# Supplementary material for: Managing the retro-pathway in direct catalytic asymmetric aldol reactions of thioamides
Source: Royal Society of Chemistry journal article supplement (doi:10.1039/c5sc02218e), 2015-01-01

---

## Managing the Retro-Pathway in Direct Catalytic Asymmetric Aldol Reactions of Thioamides

Youmei Bao, Naoya Kumagai,\* and Masakatsu Shibasaki\*

*Institute of Microbial Chemistry (BIKAKEN), Tokyo, Japan*

mshibasa@bikaken.or.jp, nkumagai@bikaken.or.jp

---

|                                                                  |        |
|------------------------------------------------------------------|--------|
| 1. General                                                       | S2     |
| 2. Instrumentation                                               | S2     |
| 3. Materials                                                     | S2     |
| 4. General Procedure                                             | S2     |
| 4.1. Synthesis of additive <b>8</b> .                            | S2     |
| 4.2. Synthesis of additive <b>9</b> .                            | S3     |
| 4.3. Direct catalytic asymmetric aldol reaction (Table 1 and 2). | S3–10  |
| 4.3.1. Characterization of <i>syn</i> -aldol products.           |        |
| 4.3.2. Crossover experiments.                                    |        |
| 4.4. Reaction with Chiral Aldehyde (Table 3 and 4).              | S10–15 |
| 4.4.1. Synthesis of ( <i>S</i> )- <b>2k</b> .                    |        |
| 4.4.2. Experimental procedure.                                   |        |
| 4.4.3. Determination of the absolute configuration.              |        |
| 4.4.4. Control experiment.                                       |        |
| 5. Calculated Structure of Aldol Adducts                         | S15–22 |
| 6. NMR Spectra of New Compounds                                  | S23–70 |

## 1. General

The catalytic asymmetric aldol reaction was performed in a flame-dried 20 mL glass test tubes with a 3-way glass stopcock under Ar atmosphere unless otherwise noted. Air- and moisture-sensitive liquids were transferred via a gas-tight syringe and a stainless-steel needle. All work-up and purification procedures were carried out with reagent-grade solvents under ambient atmosphere.

## 2. Instrumentation

Infrared (IR) spectra were recorded on a JASCO FT/IR 410 Fourier transform infrared spectrophotometer. NMR was recorded on JEOL ECS-400. Chemical shifts for protons are reported in parts per million downfield from tetramethylsilane and referenced to residual protium in the NMR solvent (CDCl<sub>3</sub>:  $\delta$  7.24 ppm). For <sup>13</sup>C NMR chemical shifts are reported in the scale relative to NMR solvent (CDCl<sub>3</sub>:  $\delta$  77.0 ppm) as an internal reference. NMR data are reported as follows: chemical shifts, multiplicity (s: singlet, d: doublet, dd: doublet of doublets, t: triplet, q: quartet, m: multiplet, br: broad signal), coupling constant (Hz), and integration. Optical rotation was measured using a 2 mL cell with a 1.0 dm path length on a JASCO polarimeter P-1030. High resolution mass spectra (ESI Orbitrap (+)) were measured on ThermoFisher Scientific LTQ Orbitrap XL. HPLC analysis was conducted on a JASCO HPLC system equipped with Daicel chiral-stationary-phase columns ( $\phi$  0.46 cm x 25 cm).

## 3. Materials

Unless otherwise noted, materials were purchased from commercial suppliers and were used without further purification. THF, CH<sub>2</sub>Cl<sub>2</sub> and diethyl ether were purified by passing through a solvent purification system (Glass Contour). Mesitylcopper was purchased from Strem chemicals or prepared by following the literature procedure,<sup>1</sup> and handled in a glove box. (*S,S*)- and (*R,R*)-Ph-BPE and 2,2,5,7,8-pentamethylchromanol (ArOH) were purchased from Aldrich. ArOH was used after recrystallization from *n*-hexane. *N,N*-diallylpropiothioamide (**1a**) was prepared from the corresponding *N,N*-diallylpropioamide by following the reported procedure.<sup>2</sup> The same procedure was used to synthesize *N,N*-diallylbutanethioamide (**1b**) and *N,N*-diallylethanethioamide (**1c**). Column chromatography was performed with silica gel Merck 60 (230–400 mesh ASTM) or Kanto Chemical 60N (neutral, spherical, 50–60  $\mu$ m).

## 4. General Procedure

### 4.1 Synthesis of 3-hydroxy-*N,N*-dimethylpropanethioamide (additive 8).

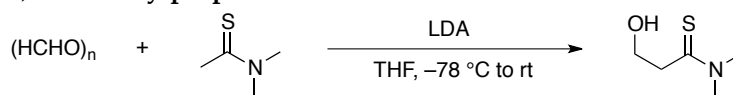

To a 200 mL flame-dried flask containing *N,N*-dimethylethanethioamide (1.0 g, 9.7 mmol) at  $-78$  °C, lithium diisopropylamide (LDA, 11 mL, 1.09 M in THF, 1.2 eq.) was added slowly and the resulting reaction mixture was warmed to  $0$  °C. After stirring for 30 min, the reaction mixture was cooled down to  $-78$  °C and paraformaldehyde (1.5 g, 5 eq.) dispersed in 30 mL THF was added. After 10 min of stirring at  $-78$  °C, the reaction mixture was warmed to room temperature and stirred for overnight. The reaction was quenched with 50 mL of sat. NH<sub>4</sub>Cl aq. and the biphasic mixture was extracted with CHCl<sub>3</sub>, and the combined organic extracts were dried over Na<sub>2</sub>SO<sub>4</sub>. Volatiles were removed under reduced pressure and the resulting crude mixture was purified by silica gel column chromatography to give **8** as a pale yellow oil (570 mg, 44% yield).

<sup>1</sup>H NMR (CDCl<sub>3</sub>, 400 Hz):  $\delta$  4.02–3.98 (m, 2H), 3.83 (t,  $J$  = 7.1 Hz, 1H), 3.49 (s, 3H), 3.29 (s, 3H), 2.74 (t,  $J$  = 5.0 Hz, 2H); <sup>13</sup>C NMR (CDCl<sub>3</sub>, 150 Hz):  $\delta$  201.4, 59.9, 44.1, 43.0, 41.5.

<sup>1</sup>Tsuda, T.; Yazawa, T.; Watanabe, K.; Fujii, T.; Saegusa, T. *J. Org. Chem.* **1981**, *46*, 192.

<sup>2</sup>Iwata, M.; Yazaki, R.; Chen, H.; Sureshkumar, D.; Kumagai, N.; Shibasaki, M. *J. Am. Chem. Soc.* **2011**, *133*, 5554.

## 4.2 Synthesis of 2-hydroxy-*N,N*-dimethylbenzothioamide (additive 9)

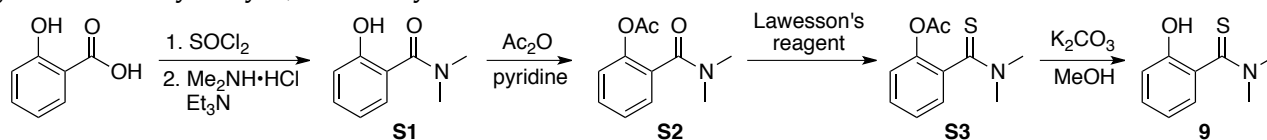

To a 300 mL flask, 50 mL  $\text{SOCl}_2$  and salicylic acid (10 g, 72.5 mmol) were added. The reaction mixture was heated to 80 °C for 1 h. After cooling,  $\text{SOCl}_2$  was carefully evaporated. The resulting mixture was dissolved in 100 mL toluene, and  $\text{Me}_2\text{NH}\cdot\text{HCl}$  (17.7 g, 217.5 mmol, 3 eq.) and triethylamine (40.4 mL, 290 mmol, 4 eq.) were added. After stirring at room temperature for overnight, the reaction mixture was heated to 100 °C for 1 h. After cooling to room temperature, 170 mL sat.  $\text{NH}_4\text{Cl}$  aq. was added and the mixture was extracted with  $\text{CH}_2\text{Cl}_2$ , and the combined extracts were dried over  $\text{Na}_2\text{SO}_4$ . The filtrate was concentrated and recrystallized from  $\text{EtOAc}/n$ -hexane to give **S1** as a white to orange crystal (11.2 g, 94% yield).

To the flask containing **S1** (5 g, 30.2 mmol) in 150 mL  $\text{CH}_2\text{Cl}_2$  at 0 °C, pyridine (4.8 mL, 60.4 mmol, 2 eq.) and acetic anhydride (4.3 mL, 45.5 mmol, 1.5 eq.) were added and the reaction mixture was warmed to room temperature. After stirring for overnight, the reaction was quenched with 50 mL 0.5 N HCl aq. and the mixture was extracted with  $\text{CH}_2\text{Cl}_2$ . The combined organic extracts were washed with brine and dried over  $\text{Na}_2\text{SO}_4$ . Filtration and evaporation gave an orange oil of **S2**, which were used directly for the next step. To a stirred solution of **S2** (5 g, 24.1 mmol) in 240 mL THF, Lawesson's reagent (5.4 g, 13.3 mmol, 0.55 eq.) was added and the reaction mixture was refluxed for 1 h. After cooling to room temperature, the mixture was concentrated and loaded onto silica gel for silica gel column chromatography to give **S3** as a pale yellow crystal (4.4 g, 81% yield).

To a stirred solution of **S3** (3.6 g, 16.2 mmol) in 60 mL MeOH,  $\text{K}_2\text{CO}_3$  (2.2 g, 16.2 mmol, 1 eq.) was added and the reaction mixture was stirred at room temperature for overnight. After removal of volatiles, 150 mL of sat.  $\text{NH}_4\text{Cl}$  aq. was added and the resulting mixture was extracted with ether. The combined organic extracts were washed with brine and dried over  $\text{Na}_2\text{SO}_4$ . The filtrate was concentrated and purified by silica gel column chromatography to give **9** as a pale pink solid (2.7 g, 92% yield).  $^1\text{H}$  NMR ( $\text{CDCl}_3$ , 400 Hz):  $\delta$  8.35 (s, 1H), 7.51–7.47 (m, 1H), 7.26–7.23 (m, 2H), 7.14–7.10 (m, 1H), 3.84 (s, 3H), 3.52 (s, 3H);  $^{13}\text{C}$  NMR ( $\text{CDCl}_3$ , 150 Hz):  $\delta$  196.5, 153.7, 130.9, 127.0, 126.1, 119.5, 118.3, 44.7, 42.9.

## 4.3 Direct catalytic asymmetric aldol reaction (Table 1 and 2).

### 4.3.1 General procedure for the catalytic asymmetric aldol reaction

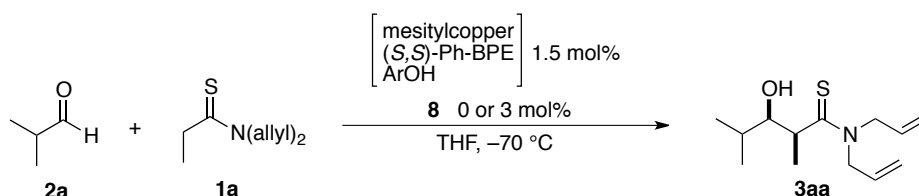

To a flame-dried 20 mL test tube equipped with a magnetic stirring bar and a 3-way glass stopcock were charged with (*S,S*)-Ph-BPE (6.1 mg, 0.012 mmol), 2,2,5,7,8-pentamethylchromanol (ArOH, 2.6 mg, 0.012 mmol) and mesitylcopper (2.2 mg, 0.012 mmol) in a dry box. To the mixture was added dry THF (240  $\mu\text{L}$ , 0.05 M) *via* syringe at room temperature, after 5 min of stirring at the same temperature, yellow-green solution of (*S,S*)-Ph-BPE/mesitylcopper/ArOH solution was obtained, which was used within 15 min.

To a flame-dried 20 mL test tube equipped with a magnetic stirring bar and a 3-way glass stopcock were charged with *N,N*-diallylthiopropionamide (**1a**, 40  $\mu\text{L}$ , 0.24 mmol, 1.2 eq.), dry THF (882  $\mu\text{L}$  or 822  $\mu\text{L}$ , 0.2 M), **2a** (18  $\mu\text{L}$ , 0.2 mmol) and additive **8** (60  $\mu\text{L}$ , 0.1 M in THF, 6  $\mu\text{mol}$ ) if any. The reaction mixture was cooled to -70 °C. To the resulting cooled solution was added (*S,S*)-Ph-BPE/mesitylcopper/ArOH solution (60  $\mu\text{L}$ , 3  $\mu\text{mol}$ ) prepared above dropwise to run the reaction. After certain time at the same temperature, the precooled solution of acetic acid in THF (0.1 M in THF, 1 mL, 0.1 mmol), then saturated aq.  $\text{NH}_4\text{Cl}$  were added to quench the reaction. The aqueous layer was extracted with ethyl acetate. The combined organic layers were washed with brine and dried over  $\text{Na}_2\text{SO}_4$ . The filtrate was

concentrated under reduced pressure. The chemical yield and diastereomeric ratio were determined by  $^1\text{H}$  NMR of the crude mixture. The crude product was purified by silica gel column chromatography to give the desired product as a colorless oil.

### (2*S*,3*R*)-*N,N*-Diallyl-3-hydroxy-2,4-dimethylpentanethioamide (3aa)

Colorless oil, IR ( $\text{CHCl}_3$  solution)  $\nu$  3402, 3019, 1710, 1488, 1412, 1362, 1210, 1089, 929, 670  $\text{cm}^{-1}$ ;  $^1\text{H}$  NMR ( $\text{CDCl}_3$ , 400 MHz):  $\delta$  5.90–5.73 (m, 2H), 5.28–5.09 (m, 4H), 4.85–4.80 (m, 2H), 4.24 (dd,  $J$  = 6.0, 14.7 Hz, 1H), 4.20 (dd,  $J$  = 4.6, 15.6 Hz, 1H), 4.09 (dd,  $J$  = 4.6, 17.4 Hz, 1H), 3.31 (d,  $J$  = 8.9 Hz, 1H), 3.16 (q,  $J$  = 6.9 Hz, 1H), 1.68 (m, 1H), 1.18 (d,  $J$  = 6.9 Hz, 3H), 1.00 (d,  $J$  = 6.6 Hz, 3H), 0.81 (d,  $J$  = 6.6 Hz, 3H);  $^{13}\text{C}$  NMR ( $\text{CDCl}_3$ , 150 MHz):  $\delta$  210.9, 130.8, 130.4, 118.6, 117.7, 77.9, 55.6, 52.6, 42.8, 31.1, 19.7, 19.2, 13.8; HRMS (ESI-Orbitrap) Anal. calcd. for  $\text{C}_{13}\text{H}_{23}\text{ONNaS}$   $m/z$  264.1393  $[\text{M}+\text{Na}]^+$ , found 264.1386;  $[\alpha]_{\text{D}}^{26}$  128.8 ( $c$  1.21,  $\text{CHCl}_3$ , 94% ee sample); HPLC: CHIRALCEL OZ-H ( $\phi$  0.46 cm  $\times$  25 cm), 2-propanol/*n*-hexane = 1/99, flow rate 1.0 mL/min, detection 254 nm,  $t_{\text{R}}$  = 14.2 min (minor), 25.3 min (major).

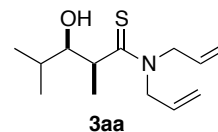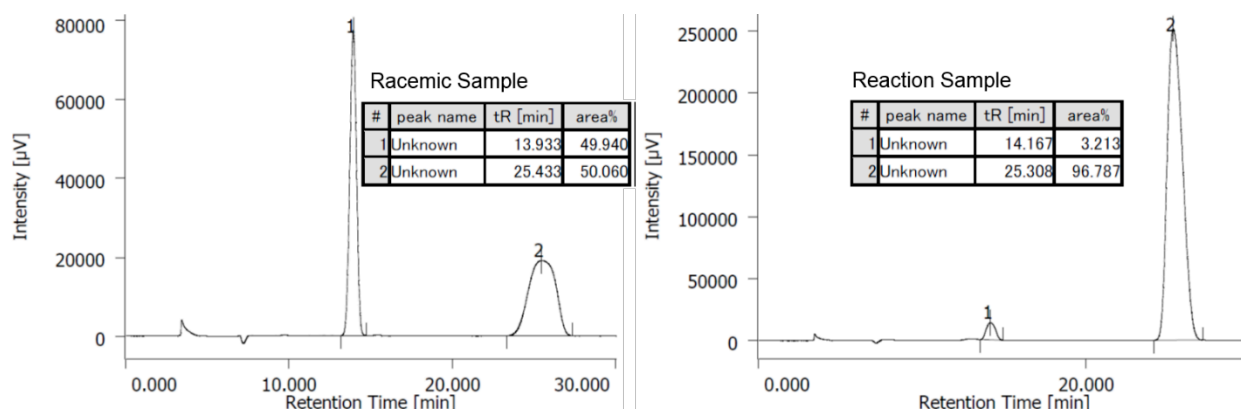

### (2*S*,3*R*)-*N,N*-Diallyl-3-cyclohexyl-3-hydroxy-2-methylpropanethioamide (3ab)

Colorless oil, IR ( $\text{CHCl}_3$  solution)  $\nu$  3335, 2990, 2927, 2853, 1643, 1489, 1449, 1412, 1221, 1205, 1143, 930  $\text{cm}^{-1}$ ;  $^1\text{H}$  NMR ( $\text{CDCl}_3$ , 400 MHz):  $\delta$  5.85–5.74 (m, 2H), 5.28–5.12 (m, 4H), 4.82–4.76 (m, 2H), 4.36 (dd,  $J$  = 5.9, 14.6 Hz, 1H), 4.2–4.0 (m, 2H), 3.36 (d,  $J$  = 8.7 Hz, 1H), 3.15 (q,  $J$  = 6.6 Hz, 1H), 2.09 (d,  $J$  = 13.0 Hz, 1H), 1.72–1.69 (m, 2H), 1.64–1.54 (m, 2H), 1.39–1.34 (m, 1H), 1.21–1.07 (m, 6H), 0.93–0.81 (m, 2H);  $^{13}\text{C}$  NMR ( $\text{CDCl}_3$ , 150 MHz):  $\delta$  210.8, 130.8, 130.4, 118.5, 117.6, 76.5, 55.5, 52.6, 42.4, 40.5, 29.8, 29.2, 26.4, 26.0, 25.9, 13.8; HRMS (ESI-Orbitrap) Anal. calcd. for  $\text{C}_{16}\text{H}_{27}\text{ONNaS}$   $m/z$  304.1706  $[\text{M}+\text{Na}]^+$ , found 304.1705;  $[\alpha]_{\text{D}}^{25}$  119.9 ( $c$  2.80,  $\text{CHCl}_3$ , 90% ee sample); HPLC: CHIRALCEL OZ-H ( $\phi$  0.46 cm  $\times$  25 cm), 2-propanol/*n*-hexane = 1/99, flow rate 1.0 mL/min, detection 254 nm,  $t_{\text{R}}$  = 15.4 min (minor), 38.1 min (major).

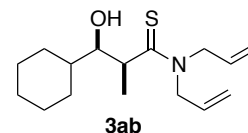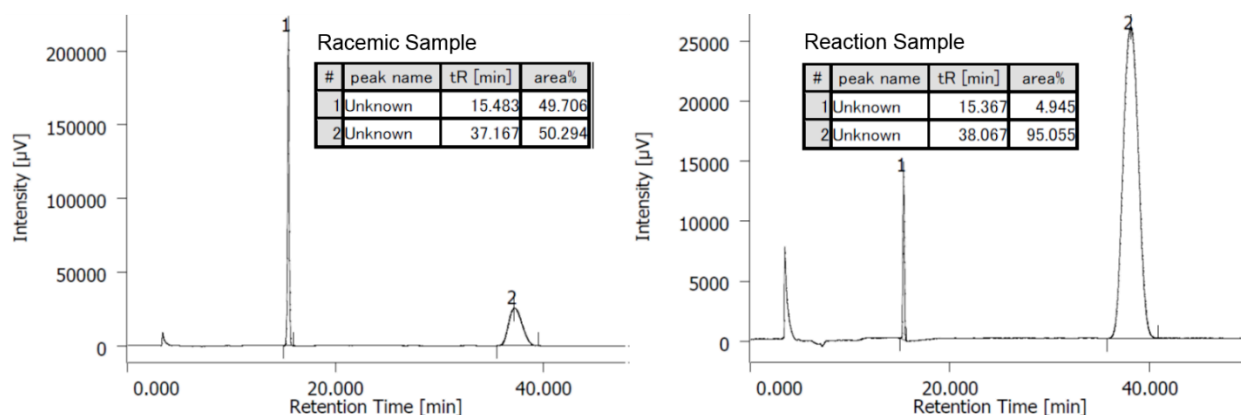

### (2*S*,3*R*)-*N,N*-Diallyl-3-hydroxy-2,5,5-trimethylhexanethioamide (3ac)

Colorless oil, IR ( $\text{CHCl}_3$  solution)  $\nu$  3407, 3018, 1709, 1415, 1363, 1217, 1090, 926, 669  $\text{cm}^{-1}$ ;  $^1\text{H}$  NMR ( $\text{CDCl}_3$ , 400 MHz):  $\delta$  5.88–5.73 (m, 2H), 5.27–5.09 (m, 4H), 4.94 (dd,  $J$  = 5.0, 14.7 Hz, 1H), 4.59 (s, 1H), 4.25–4.17 (m, 2H), 4.05 (dt,  $J$  = 2.3, 17.6 Hz, 1H), 3.91 (dd,  $J$  = 1.6, 8.5 Hz, 1H), 2.75

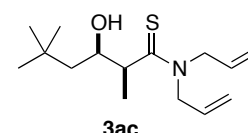



(qd,  $J = 1.6, 6.9$  Hz, 1H), 1.48 (q,  $J = 8.5$  Hz, 1H), 1.21 (d,  $J = 6.6$  Hz, 3H), 1.03 (d,  $J = 14.0$  Hz, 1H), 0.91 (s, 9H);  $^{13}\text{C}$  NMR ( $\text{CDCl}_3$ , 150 MHz):  $\delta$  210.8, 131.0, 130.5, 118.5, 117.6, 70.0, 55.3, 52.6, 49.4, 48.2, 30.3, 30.0, 14.0; HRMS (ESI-Orbitrap) Anal. calcd. for  $\text{C}_{15}\text{H}_{28}\text{ONS}$   $m/z$  270.1886  $[\text{M}+\text{H}]^+$ , found 270.1884;  $[\alpha]_{\text{D}}^{26}$  127.2 ( $c$  1.54,  $\text{CHCl}_3$ , 90% ee sample); HPLC: CHIRALCEL OD-H ( $\phi$  0.46 cm  $\times$  25 cm) and OD-H ( $\phi$  0.46 cm  $\times$  25 cm), 2-propanol/ $n$ -hexane = 1/99, flow rate 0.5 mL/min, detection 254 nm,  $t_{\text{R}} = 26.4$  min (minor), 28.2 min (major).

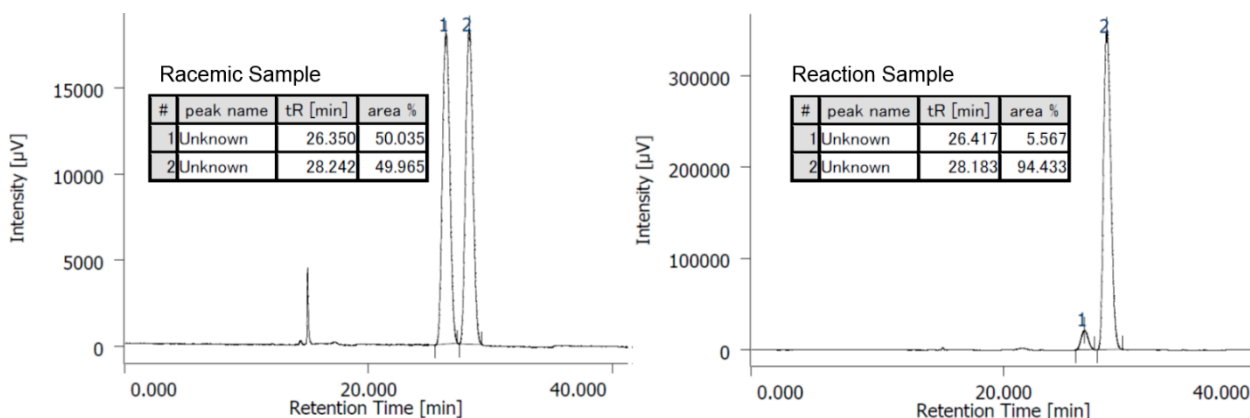

**(2S,3R)-N,N-Diallyl-7-((tert-butylidimethylsilyl)oxy)-3-hydroxy-2,5,5-trimethylheptanethioamide (3ad)**

Colorless oil, IR ( $\text{CHCl}_3$  solution)  $\nu$  3368, 3019, 1710, 1211, 1083, 929, 670  $\text{cm}^{-1}$ ;  $^1\text{H}$  NMR ( $\text{CDCl}_3$ , 400 MHz):  $\delta$  5.85–5.72 (m, 2H), 5.27–5.09 (m, 4H), 4.88 (dd,  $J = 5.3, 14.9$  Hz, 1H), 4.53 (s, 1H), 4.31 (dd,  $J = 5.2, 13.7$  Hz, 1H), 4.20–4.06 (m, 2H), 3.95 (d,  $J = 8.7$  Hz, 1H), 3.71–3.61 (m, 2H), 2.76–2.74 (m, 1H), 1.70–1.63 (m, 1H), 1.52–1.38 (m, 2H), 1.22 (d,  $J = 6.9$  Hz, 3H), 1.12 (d,  $J = 14.2$  Hz, 1H), 0.93 (s, 3H), 0.90 (s, 3H), 0.86 (s, 9H), 0.02 (s, 6H);  $^{13}\text{C}$  NMR ( $\text{CDCl}_3$ , 150 MHz):  $\delta$  210.5, 131.1, 130.6, 118.5, 117.6, 70.4, 60.2, 55.3, 52.6, 48.7, 47.4, 44.4, 32.2, 28.1, 28.0, 25.9, 18.2, 15.1, –5.3, –5.4; HRMS (ESI-Orbitrap) Anal. calcd. for  $\text{C}_{22}\text{H}_{44}\text{O}_2\text{NSSi}$   $m/z$  414.2857  $[\text{M}+\text{H}]^+$ , found 414.2852;  $[\alpha]_{\text{D}}^{26}$  82.0 ( $c$  1.11,  $\text{CHCl}_3$ , 90% ee sample); HPLC: CHIRALCEL OZ-H ( $\phi$  0.46 cm  $\times$  25 cm), 2-propanol/ $n$ -hexane = 2/98, flow rate 0.5 mL/min, detection 254 nm,  $t_{\text{R}} = 9.0$  min (minor), 12.2 min (major).

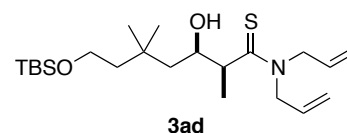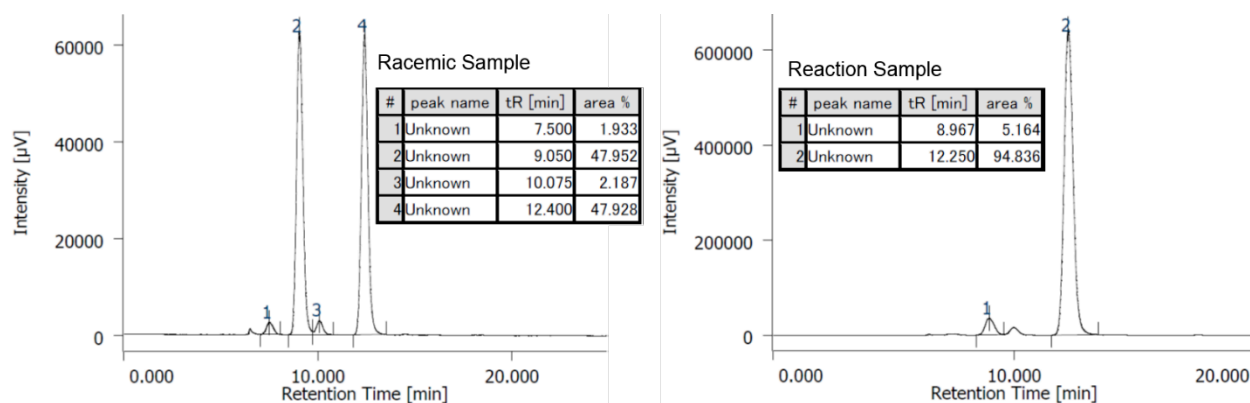

**(2S,3R)-N,N-Diallyl-4-(2-ethyl-1,3-dioxolan-2-yl)-3-hydroxy-2-methylbutanethioamide (3ae)**

Colorless oil, IR ( $\text{CHCl}_3$  solution)  $\nu$  3501, 3019, 1486, 1411, 1061, 930, 669  $\text{cm}^{-1}$ ;  $^1\text{H}$  NMR ( $\text{CDCl}_3$ , 400 MHz):  $\delta$  5.88–5.73 (m, 2H), 5.27–5.11 (m, 4H), 4.68 (dd,  $J = 5.8, 14.9$  Hz, 1H), 4.50 (dd,  $J = 6.0, 14.9$  Hz, 1H), 4.28–4.20 (m, 2H), 4.16–4.10 (m, 2H), 3.93–3.90 (m, 4H), 3.02–2.96 (m, 1H), 1.88 (dd,  $J = 2.5, 14.2$  Hz, 1H), 1.68 (q,  $J = 8.0$  Hz, 2H), 1.60 (dd,  $J = 8.7, 14.2$  Hz, 1H), 1.28 (d,  $J = 6.6$  Hz, 3H), 0.88 (t,  $J = 7.6$  Hz, 3H);  $^{13}\text{C}$  NMR ( $\text{CDCl}_3$ , 150 MHz):  $\delta$  208.9, 131.3, 130.7, 118.3, 117.7, 112.0, 71.3, 64.8, 64.5, 55.4, 52.6, 47.7, 40.1, 29.7, 17.0, 8.0; HRMS (ESI-Orbitrap) Anal. calcd. for  $\text{C}_{16}\text{H}_{27}\text{O}_3\text{NNaS}$   $m/z$  336.1604  $[\text{M}+\text{Na}]^+$ , found 336.1600;  $[\alpha]_{\text{D}}^{26}$  91.1 ( $c$  0.91,  $\text{CHCl}_3$ , >99% ee sample); HPLC: CHIRALCEL OZ-H ( $\phi$  0.46 cm  $\times$  25 cm), 2-propanol/ $n$ -hexane = 10/90, flow rate 1.0 mL/min, detection 254 nm,  $t_{\text{R}} = 7.2$  min (minor), 10.2 min (major).

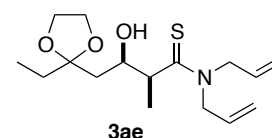

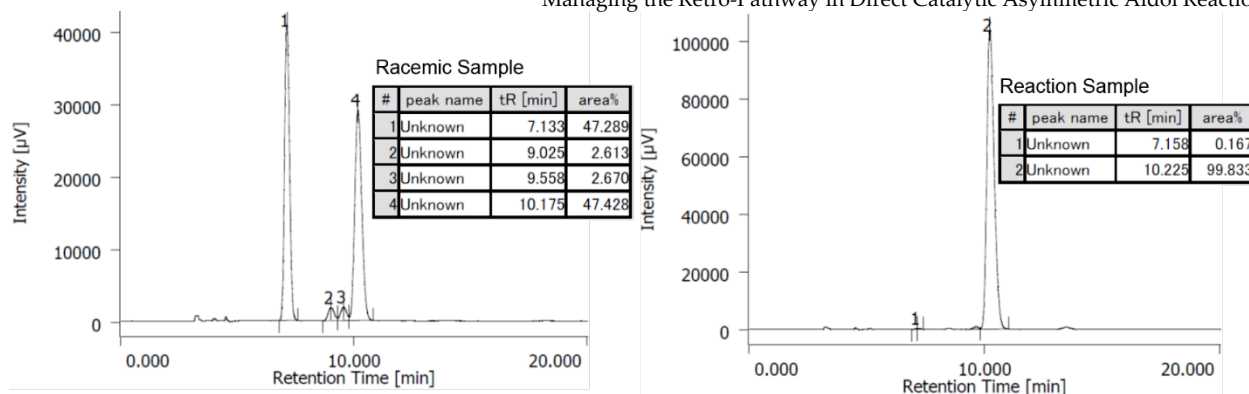

### (2*S*,3*R*)-*N,N*-Diallyl-3-hydroxy-2,5-dimethylhexanethioamide (**3af**)

Colorless oil, IR (CHCl<sub>3</sub> solution)  $\nu$  3400, 3019, 1710, 1488, 1413, 1363, 1213, 930, 669 cm<sup>-1</sup>; <sup>1</sup>H NMR (CDCl<sub>3</sub>, 400 MHz):  $\delta$  5.87–5.73 (m, 2H), 5.26–5.07 (m, 4H), 4.93 (dd,  $J$  = 5.3, 14.9 Hz, 1H), 4.64 (s, 1H), 4.24–4.17 (m, 2H), 4.07–4.02 (m, 1H), 3.87–3.84 (m, 1H), 2.81 (qd,  $J$  = 1.6, 6.6 Hz, 1H), 1.80–1.70 (m, 1H), 1.51–1.43 (m, 1H), 1.19 (d,  $J$  = 6.9 Hz, 3H), 1.00–0.97 (m, 1H), 0.87 (d,  $J$  = 3.2 Hz, 3H), 0.85 (d,  $J$  = 3.0 Hz, 3H); <sup>13</sup>C NMR (CDCl<sub>3</sub>, 150 MHz):  $\delta$  210.9, 131.0, 130.4, 118.5, 117.5, 70.4, 55.3, 52.7, 46.4, 44.0, 24.4, 23.4, 21.9, 13.9; HRMS (ESI-Orbitrap) Anal. calcd. for C<sub>14</sub>H<sub>26</sub>ONS  $m/z$  256.1730 [M+H]<sup>+</sup>, found 256.1728; [ $\alpha$ ]<sub>D</sub><sup>26</sup> 140.8 ( $c$  1.94, CHCl<sub>3</sub>, 96% ee sample); HPLC: CHIRALCEL OZ-H ( $\phi$  0.46 cm x 25 cm), 2-propanol/*n*-hexane = 2/98, flow rate 1.0 mL/min, detection 254 nm,  $t_R$  = 8.6 min (minor), 18.8 min (major).

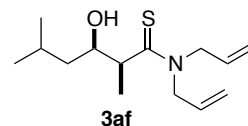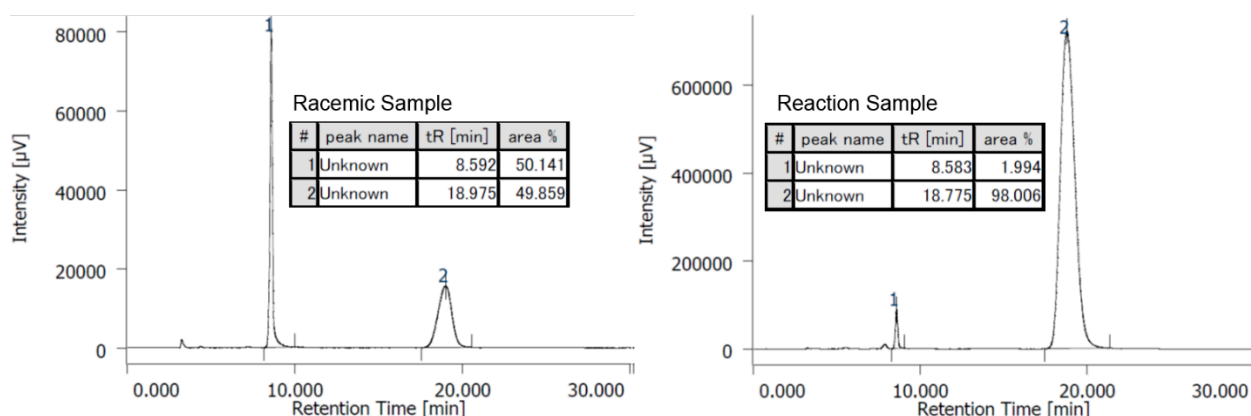

### (2*S*,3*R*)-*N,N*-Diallyl-3-hydroxy-2,6,6-trimethylheptanethioamide (**3ag**)

Colorless oil, IR (CHCl<sub>3</sub> solution)  $\nu$  3352, 2957, 1710, 1489, 1412, 1364, 930, 669 cm<sup>-1</sup>; <sup>1</sup>H NMR (CDCl<sub>3</sub>, 400 MHz):  $\delta$  5.89–5.75 (m, 2H), 5.30–5.11 (m, 4H), 4.87 (dd,  $J$  = 5.3, 14.9 Hz, 1H), 4.72 (s, 1H), 4.32 (dd,  $J$  = 6.2, 14.9 Hz, 1H), 4.20 (dd,  $J$  = 3.6, 17.4 Hz, 1H), 4.09 (dd,  $J$  = 4.6, 17.4 Hz, 1H), 3.70 (t,  $J$  = 6.9 Hz, 1H), 2.93 (q,  $J$  = 6.6 Hz, 1H), 1.53–1.50 (m, 1H), 1.36 (dt,  $J$  = 4.1, 12.8 Hz, 1H), 1.27–1.21 (m, 4H), 1.08 (dt,  $J$  = 4.1, 12.8 Hz, 1H), 0.86 (s, 9H); <sup>13</sup>C NMR (CDCl<sub>3</sub>, 150 MHz):  $\delta$  210.8, 131.0, 130.4, 118.6, 117.7, 73.5, 55.4, 52.7, 45.8, 40.3, 30.1, 29.8, 29.3, 13.8; HRMS (ESI-Orbitrap) Anal. calcd. for C<sub>16</sub>H<sub>30</sub>ONS  $m/z$  284.2043 [M+H]<sup>+</sup>, found 284.2042; [ $\alpha$ ]<sub>D</sub><sup>22</sup> 120.0 ( $c$  1.05, CHCl<sub>3</sub>, 97% ee sample); HPLC: CHIRALCEL OZ-H ( $\phi$  0.46 cm x 25 cm), 2-propanol/*n*-hexane = 2/98, flow rate 1.0 mL/min, detection 254 nm,  $t_R$  = 8.4 min (minor), 18.5 min (major).

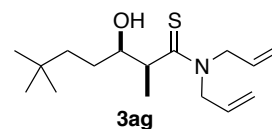

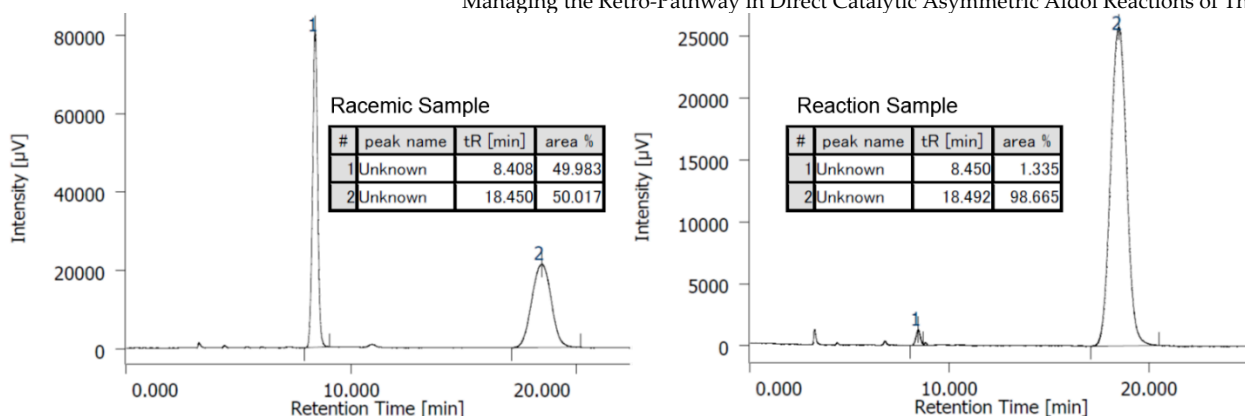**(2S,3R)-N,N-Diallyl-3-hydroxy-2-methyl-5-phenylpentanethioamide (3ah)**

Colorless oil, IR (CHCl<sub>3</sub> solution)  $\nu$  3348, 3007, 1710, 1492, 1453, 1412, 930, 770 cm<sup>-1</sup>; <sup>1</sup>H NMR (CDCl<sub>3</sub>, 400 MHz):  $\delta$  7.32–7.18 (m, 5H), 5.92–5.74 (m, 2H), 5.29–5.09 (m, 4H), 4.94 (dd,  $J$  = 5.3, 14.9 Hz, 1H), 4.82 (s, 1H), 4.30 (dd,  $J$  = 6.4, 14.9 Hz, 1H), 4.20 (dd,  $J$  = 4.2, 17.4 Hz, 1H), 4.08 (dd,  $J$  = 4.4, 17.4 Hz, 1H), 3.86 (dd,  $J$  = 3.0, 9.4 Hz, 1H), 2.93–2.87 (m, 2H), 2.70–2.66 (m, 1H), 1.96–1.90 (m, 1H), 1.59–1.56 (m, 1H), 1.27 (d,  $J$  = 6.9 Hz, 3H); <sup>13</sup>C NMR (CDCl<sub>3</sub>, 150 MHz):  $\delta$  210.5, 142.0, 130.9, 130.4, 128.4, 128.3, 125.7, 118.6, 117.6, 71.9, 55.3, 52.7, 46.3, 36.7, 32.4, 14.0; HRMS (ESI-Orbitrap) Anal. calcd. for C<sub>18</sub>H<sub>26</sub>ONS  $m/z$  304.1730 [M+H]<sup>+</sup>, found 304.1730; [ $\alpha$ ]<sub>D</sub><sup>22</sup> 145.1 ( $c$  1.76, CHCl<sub>3</sub>, 98% ee sample); HPLC: CHIRALCEL OZ-H ( $\phi$  0.46 cm x 25 cm), 2-propanol/*n*-hexane = 10/90, flow rate 0.5 mL/min, detection 254 nm,  $t_R$  = 13.4 min (minor), 17.7 min (major).

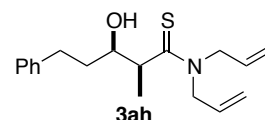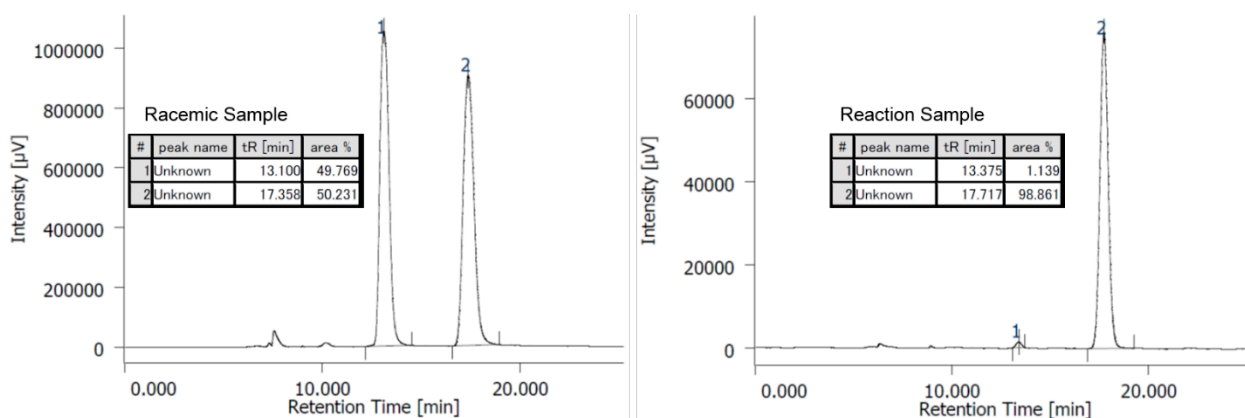**(2S,3S)-N,N-Diallyl-4-((*tert*-butyldiphenylsilyl)oxy)-3-hydroxy-2-methylbutanethioamide (3ai)**

Colorless oil, IR (CHCl<sub>3</sub> solution)  $\nu$  3342, 2932, 2859, 1710, 1488, 1428, 1363, 1226, 1112, 996, 823, 703 cm<sup>-1</sup>; <sup>1</sup>H NMR (CDCl<sub>3</sub>, 400 MHz):  $\delta$  7.61–7.59 (m, 4H), 7.41–7.36 (m, 6H), 5.87–5.67 (m, 2H), 5.24–5.06 (m, 4H), 4.62 (dd,  $J$  = 5.0, 15.4 Hz, 1H), 4.52 (dd,  $J$  = 5.2, 14.9 Hz, 1H), 4.38 (s, 1H), 4.23 (dd,  $J$  = 3.2, 17.4 Hz, 1H), 4.09 (dd,  $J$  = 1.8, 17.4 Hz, 1H), 3.97–3.95 (m, 1H), 3.70–3.68 (m, 1H), 3.57–3.55 (m, 1H), 3.40 (q,  $J$  = 6.6 Hz, 1H), 1.16 (d,  $J$  = 6.8 Hz, 3H), 1.04 (s, 9H); <sup>13</sup>C NMR (CDCl<sub>3</sub>, 150 MHz):  $\delta$  209.7, 135.48, 135.45, 133.0, 130.9, 130.5, 129.80, 129.78, 127.7, 118.5, 117.7, 73.2, 64.1, 55.2, 52.6, 42.3, 26.9, 19.0, 14.0; HRMS (ESI-Orbitrap) Anal. calcd. for C<sub>27</sub>H<sub>37</sub>O<sub>2</sub>NNaSi  $m/z$  490.2206 [M+Na]<sup>+</sup>, found 490.2198; [ $\alpha$ ]<sub>D</sub><sup>25</sup> 35.9 ( $c$  2.24, CHCl<sub>3</sub>, 97% ee sample); HPLC: CHIRALCEL OD-H ( $\phi$  0.46 cm x 25 cm) and OZ-H ( $\phi$  0.46 cm x 25 cm), 2-propanol/*n*-hexane = 1/99, flow rate 1.0 mL/min, detection 254 nm,  $t_R$  = 18.5 min (minor), 29.5 min (major).

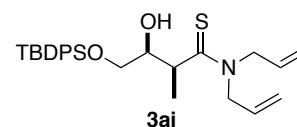

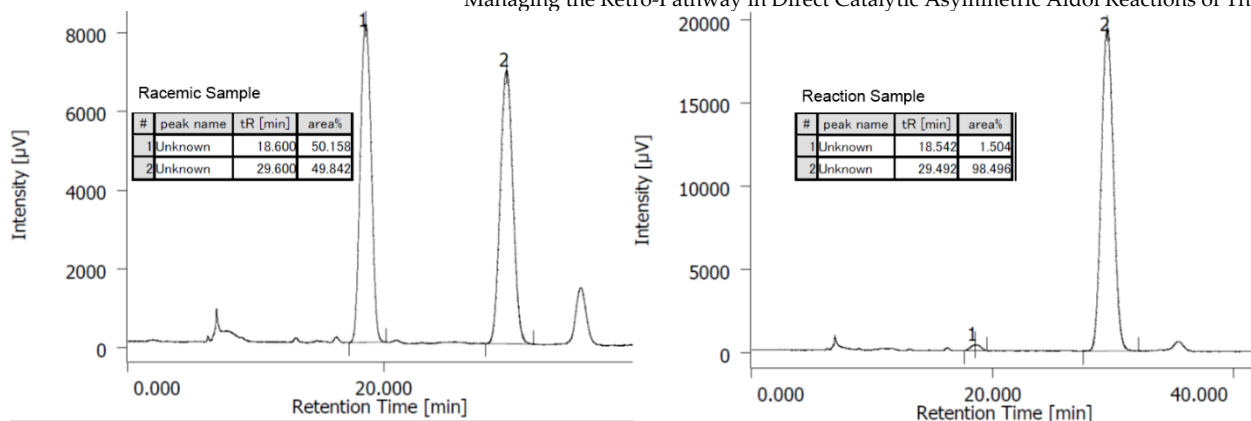

**(2*S*,3*R*)-*N,N*-Diallyl-5-((*tert*-butyldiphenylsilyl)oxy)-3-hydroxy-2-methylpentanethioamide (3aj)**

Colorless oil, IR (CHCl<sub>3</sub> solution)  $\nu$  3488, 3405, 3019, 1709, 1416, 1362, 1210, 1110, 908, 703

cm<sup>-1</sup>; <sup>1</sup>H NMR (CDCl<sub>3</sub>, 400 MHz):  $\delta$  7.66–7.62 (m, 4H), 7.41–7.34 (m, 6H), 5.87–5.69 (m, 2H), 5.23–5.09 (m, 4H), 4.75 (dd,  $J$  = 5.5, 14.9 Hz, 1H), 4.56 (s, 1H), 4.42 (dd,  $J$  = 6.2, 14.9

Hz, 1H), 4.14–4.09 (m, 3H), 3.81 (t,  $J$  = 6.0 Hz, 2H), 2.95 (m, 1H), 1.76–1.68 (m, 1H),

1.64–1.58 (m, 1H), 1.26 (d,  $J$  = 6.6 Hz, 3H), 1.02 (s, 9H); <sup>13</sup>C NMR (CDCl<sub>3</sub>, 150 MHz):  $\delta$  209.9, 135.53, 135.50, 133.4, 131.1,

130.6, 129.7, 127.68, 127.67, 118.4, 117.6, 72.0, 62.2, 55.3, 52.6, 46.8, 37.0, 26.8, 19.1, 15.3; HRMS (ESI-Orbitrap) Anal. calcd.

for C<sub>28</sub>H<sub>39</sub>O<sub>2</sub>NNaSi  $m/z$  504.2363 [M+Na]<sup>+</sup>, found 504.2359; [ $\alpha$ ]<sub>D</sub><sup>26</sup> 44.1 ( $c$  2.37, CHCl<sub>3</sub>, 92% ee sample); HPLC:

CHIRALCEL OZ-H ( $\phi$  0.46 cm  $\times$  25 cm), 2-propanol/*n*-hexane = 2/98, flow rate 1.0 mL/min, detection 254 nm,  $t_R$  = 8.5 min (minor), 18.8 min (major)

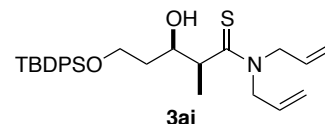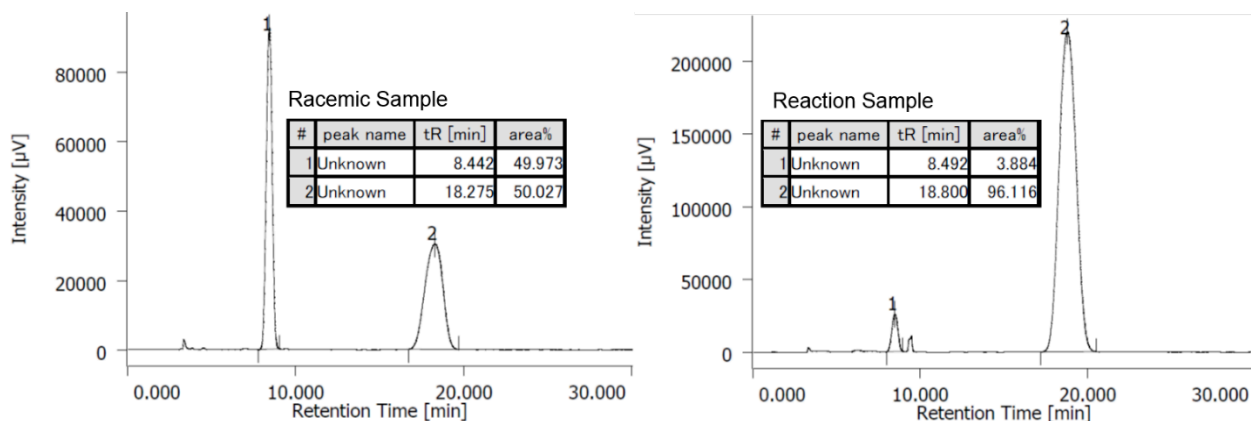

**(2*S*,3*R*)-*N,N*-Diallyl-2-ethyl-3-hydroxy-4-methylpentanethioamide (3ba)**

Colorless oil, IR (CHCl<sub>3</sub> solution)  $\nu$  3405, 3019, 1710, 1413, 1363, 1213, 1090, 929, 669 cm<sup>-1</sup>; <sup>1</sup>H NMR

(CDCl<sub>3</sub>, 400 MHz):  $\delta$  5.90–5.72 (m, 2H), 5.29–5.11 (m, 4H), 4.81 (dd,  $J$  = 5.5, 14.6 Hz, 1H), 4.72 (s, 1H), 4.43 (dd,  $J$  = 6.2, 14.6 Hz, 1H), 4.29–4.24 (m, 1H), 4.10 (dd,  $J$  = 4.8, 17.4 Hz, 1H), 3.15–3.08 (m,

2H), 2.12–2.04 (m, 1H), 1.77–1.68 (m, 2H), 0.99 (d,  $J$  = 6.6 Hz, 3H), 0.84–0.78 (m, 6H); <sup>13</sup>C NMR

(CDCl<sub>3</sub>, 150 MHz):  $\delta$  209.4, 130.9, 130.5, 118.8, 118.2, 78.4, 55.9, 52.5, 50.1, 31.5, 22.0, 20.0, 19.2, 12.2;

HRMS (ESI-Orbitrap) Anal. calcd. for C<sub>14</sub>H<sub>26</sub>ONS  $m/z$  256.1730 [M+H]<sup>+</sup>, found 256.1726; [ $\alpha$ ]<sub>D</sub><sup>26</sup> 148.0 ( $c$  1.54, CHCl<sub>3</sub>, 95%

ee sample); HPLC: CHIRALCEL OZ-H ( $\phi$  0.46 cm  $\times$  25 cm), 2-propanol/*n*-hexane = 2/98, flow rate 0.5 mL/min,

detection 254 nm,  $t_R$  = 14.8 min (minor), 17.7 min (major).

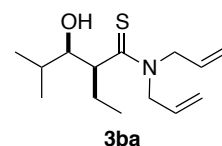

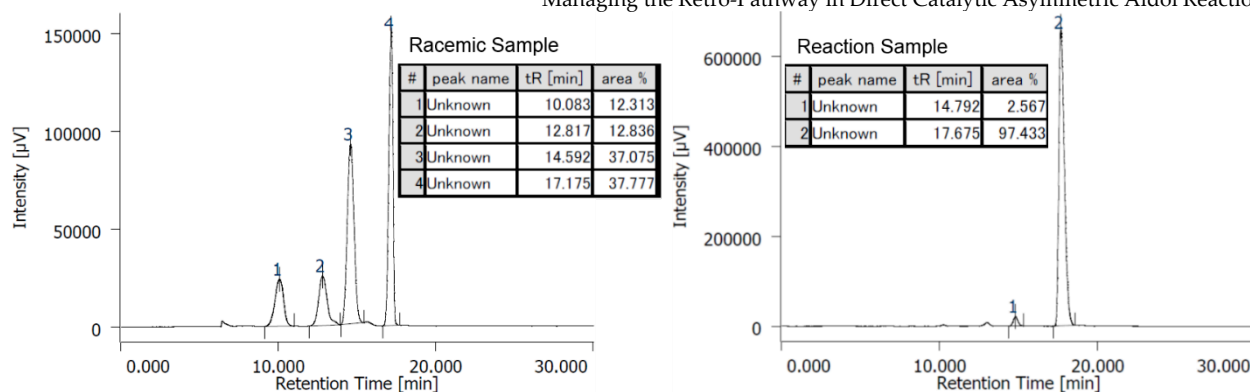

### (S)-N,N-Diallyl-3-hydroxy-4-methylpentanethioamide (**3ca**)

Colorless oil, IR (CHCl<sub>3</sub> solution)  $\nu$  3414, 2965, 1642, 1491, 1411, 1297, 1204, 994, 931, 684 cm<sup>-1</sup>; <sup>1</sup>H NMR (CDCl<sub>3</sub>, 400 MHz):  $\delta$  5.90–5.72 (m, 2H), 5.29–5.11 (m, 4H), 4.69 (dd,  $J$  = 6.0, 14.9 Hz, 1H), 4.56 (dd,  $J$  = 6.0, 14.9 Hz, 1H), 4.24 (dt,  $J$  = 2.5, 17.2 Hz, 1H), 4.09 (dt,  $J$  = 2.5, 17.4 Hz, 1H), 3.96–3.89 (m, 2H), 2.79 (dd,  $J$  = 1.8, 15.6 Hz, 1H), 2.64 (dd,  $J$  = 9.8, 15.6 Hz, 1H), 1.78–1.70 (m, 1H), 0.94 (t,  $J$  = 6.4 Hz, 6H); <sup>13</sup>C NMR (CDCl<sub>3</sub>, 150 MHz):  $\delta$  203.4, 130.53, 130.49, 118.7, 117.9, 74.6, 55.8, 52.8, 45.1, 33.3, 18.5, 17.8; HRMS (ESI-Orbitrap) Anal. calcd. for C<sub>12</sub>H<sub>21</sub>ONNaS  $m/z$  250.1236 [M+Na]<sup>+</sup>, found 250.1235; [ $\alpha$ ]<sub>D</sub><sup>25</sup> –84.8 ( $c$  0.92, CHCl<sub>3</sub>, 89% ee sample); HPLC: CHIRALCEL OD-H ( $\phi$  0.46 cm x 25 cm), 2-propanol/*n*-hexane = 1/99, flow rate 1.0 mL/min, detection 254 nm,  $t_R$  = 9.1 min (major), 12.1 min (minor).

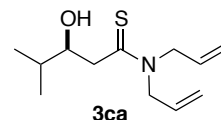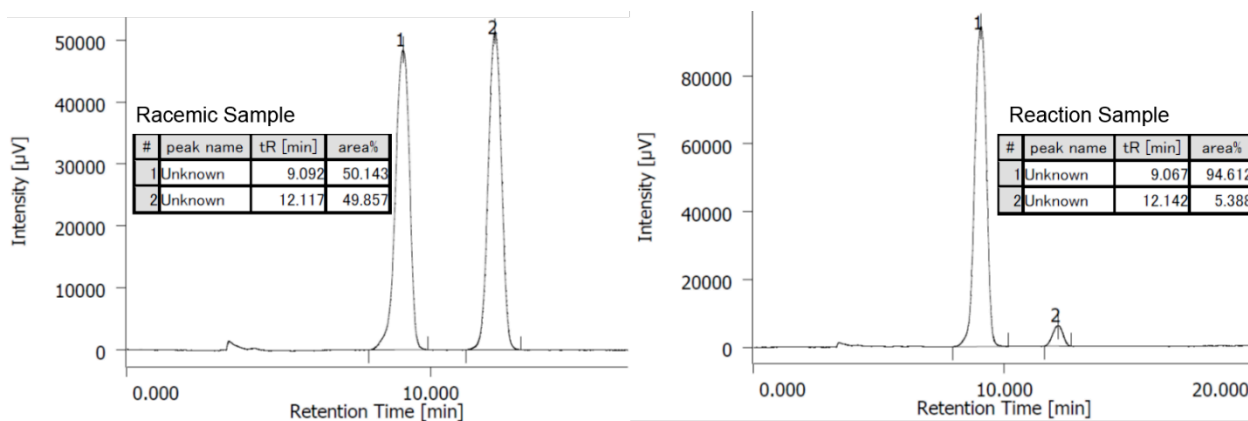

### 4.3.2 Crossover experiment.

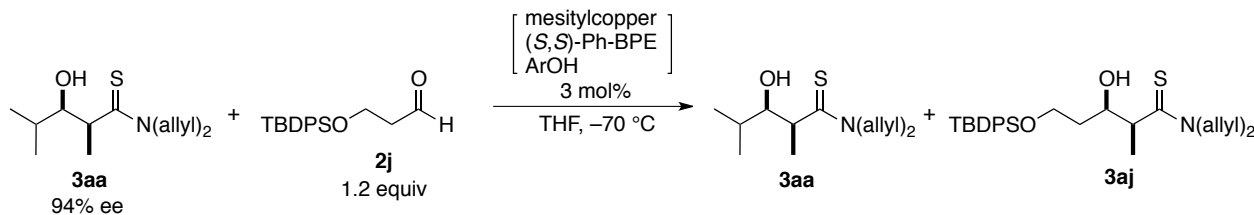

To a flame-dried 20 mL test tube equipped with a magnetic stirring bar and a 3-way glass stopcock were charged with (*S,S*)-Ph-BPE (3.0 mg, 6  $\mu$ mol), 2,2,5,7,8-pentamethylchromanol (ArOH, 1.3 mg, 6  $\mu$ mol) and mesitylcopper (1.1 mg, 6  $\mu$ mol) in a dry box. To the mixture was added THF (120  $\mu$ L, 0.05 M) *via* syringe at room temperature, after 5 min of stirring at the same temperature, yellow-green solution of (*S,S*)-Ph-BPE/mesitylcopper/ArOH solution was obtained, which was used within 15 min.

To a flame-dried 20 mL test tube equipped with a magnetic stirring bar and a 3-way glass stopcock were charged with **3aa** (24.1 mg, 0.1 mmol, 94% ee sample), **2j** (37.4 mg, 0.12 mmol, 1.2 eq.), dry THF (440  $\mu$ L, 0.2 M), the reaction mixture was cooled to –70 °C. To the resulting cooled solution was added (*S,S*)-Ph-BPE/mesitylcopper/ArOH solution (60  $\mu$ L, 3  $\mu$ mol) prepared above dropwise to run the reaction. After specified time at the same temperature, the

precooled solution of acetic acid in THF (0.1 M in THF, 1 mL, 0.1 mmol), then saturated aq.  $\text{NH}_4\text{Cl}$  were added to quench the reaction. The aqueous layer was extracted with ethyl acetate. The combined organic layers were washed with brine and dried over  $\text{Na}_2\text{SO}_4$ . The filtrate was concentrated under reduced pressure. The product distribution was determined by crude  $^1\text{H}$  NMR. The enantiomeric excess was determined by HPLC analysis.

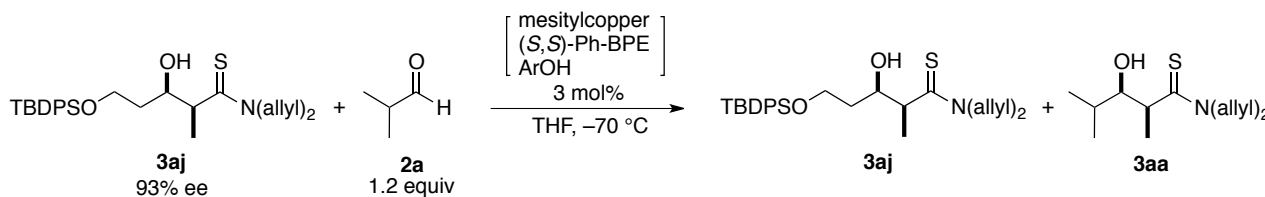

To a flame-dried 20 mL test tube equipped with a magnetic stirring bar and a 3-way glass stopcock were charged with  $(S,S)$ -Ph-BPE (3.0 mg, 6  $\mu\text{mol}$ ), 2,2,5,7,8-pentamethylchromanol (ArOH, 1.3 mg, 6  $\mu\text{mol}$ ) and mesitylcopper (1.1 mg, 6  $\mu\text{mol}$ ) in a dry box. To the mixture was added THF (120  $\mu\text{L}$ , 0.05 M) *via* syringe at room temperature, after 5 min of stirring at the same temperature, yellow-green solution of  $(S,S)$ -Ph-BPE/mesitylcopper/ArOH solution was obtained, which was used within 15 min.

To a flame-dried 20 mL test tube equipped with a magnetic stirring bar and a 3-way glass stopcock were charged with **3aj** (48.1 mg, 0.1 mmol, 93% ee sample), **2a** (11  $\mu\text{L}$ , 0.12 mmol, 1.2 eq.), dry THF (440  $\mu\text{L}$ , 0.2 M), the reaction mixture was cooled to  $-70\text{ }^\circ\text{C}$ . To the resulting cooled solution was added  $(S,S)$ -Ph-BPE/mesitylcopper/ArOH solution (60  $\mu\text{L}$ , 3  $\mu\text{mol}$ ) prepared above dropwise to run the reaction. After 48 h at the same temperature, the precooled solution of acetic acid in THF (0.1 M in THF, 1 mL, 0.1 mmol), then saturated aq.  $\text{NH}_4\text{Cl}$  were added to quench the reaction. The aqueous layer was extracted with ethyl acetate. The combined organic layers were washed with brine and dried over  $\text{Na}_2\text{SO}_4$ . The filtrate was concentrated under reduced pressure. The product distribution was determined by crude  $^1\text{H}$  NMR. The enantiomeric excess was determined by HPLC analysis.

#### 4.4. Direct catalytic asymmetric aldol reaction with chiral aldehyde (Table 3 and 4).

##### 4.4.1 Synthesis of (*S*)-2-((*tert*-butyldimethylsilyl)oxy)propanal ((*S*)-**2k**).

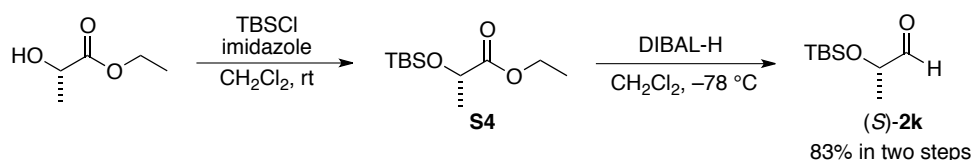

(*S*)-2-((*tert*-Butyldimethylsilyl)oxy)propanal was synthesized from ethyl L-lactate by following literature.<sup>3</sup> To a 500 mL flask containing ethyl L-lactate (14.2 g, 120 mmol) and imidazole (16.4 g, 240 mmol, 2 eq.),  $\text{CH}_2\text{Cl}_2$  (250 mL) was added and the resulting solution was cooled to  $0\text{ }^\circ\text{C}$ . TBSCl (23.6 g, 156 mmol, 1.3 eq.) in  $\text{CH}_2\text{Cl}_2$  (50 mL) was added via a cannula and the reaction mixture was warmed to room temperature. After stirring for overnight, the reaction mixture was washed with 1N HCl aq., sat.  $\text{NaHCO}_3$  aq. and brine, and dried over  $\text{Na}_2\text{SO}_4$ . Filtration and concentration gave a crude product of **S4** as a colorless oil, which was used for the next step without purification. The crude **S4** (2.2 g, 9 mmol) was dissolved in 50 mL  $\text{CH}_2\text{Cl}_2$  and the solution was cooled to  $-78\text{ }^\circ\text{C}$ . Diisobutylaluminium hydride (DIBAL-H, 11 mL, 1.04 M in *n*-hexane, 10.6 mmol, 1.2 eq.) was added dropwise via a cannula. After stirring at the same temperature for 1 h, 5 mL of methanol was added dropwise via a cannula to the reaction mixture at  $-78\text{ }^\circ\text{C}$ . After stirring at the same temperature for 20 min, the reaction mixture was warmed to  $0\text{ }^\circ\text{C}$ , and 20 mL sat. potassium sodium tartrate aq. was added. The reaction mixture was further warmed to room temperature and stirred for 3 h until clear phase separation was observed. The mixture was extracted with  $\text{CH}_2\text{Cl}_2$ , and combined organic extracts were washed with brine and dried over  $\text{Na}_2\text{SO}_4$ . Filtration and concentration gave the crude product, which was distilled to give (*S*)-**2k** as a colorless oil (83% in two steps). All data matched the reported data.<sup>3</sup>

<sup>3</sup>Kim, D.; Lee, J.; Shim, P.; Lim, J.; Doi, T.; Kim, A. *J. Org. Chem.* **2002**, 67, 772.



Colorless oil,  $^1\text{H}$  NMR ( $\text{CDCl}_3$ , 400 Hz):  $\delta$  9.59 (d,  $J = 1.4$  Hz, 1H), 4.07 (qd,  $J = 1.4, 6.9$  Hz, 1H), 1.05 (d,  $J = 6.9$  Hz, 3H), 0.89 (s, 9H), 0.08 (s, 3H), 0.07 (s, 3H);  $^{13}\text{C}$  NMR ( $\text{CDCl}_3$ , 150 Hz):  $\delta$  204.2, 73.8, 25.7, 18.5, 18.2, -4.8;  $[\alpha]_{\text{D}}^{24} -14.8$  (c 0.84,  $\text{CHCl}_3$ ). The enantiopurity of the aldehyde was determined to be >99% by HPLC analysis after transforming the aldehyde to *N*-benzyl-2-((*tert*-butyldimethylsilyl)oxy)-propanamide (**S6**) by following procedures.

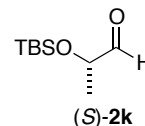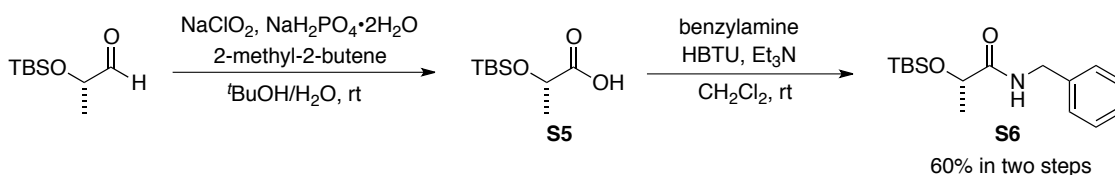

To a stirred solution of (S)-2k (188 mg, 1 mmol) in  $t\text{BuOH}/\text{H}_2\text{O}$  (1.2 mL, 5:1), 2-methyl-2-butene (1.06 mL, 10 mmol, 10 eq.),  $\text{NaClO}_2$  (271 mg, 3 mmol, 3 eq.) and  $\text{NaH}_2\text{PO}_4 \cdot 2\text{H}_2\text{O}$  (468 mg, 3 mmol, 3 eq.) were added. After stirring at room temperature for 30 min, the reaction mixture was diluted with ethyl acetate, and the resulting mixture was washed with 1N HCl aq. and brine, and dried over  $\text{Na}_2\text{SO}_4$ . Filtration and concentration gave crude acid **S5**, which was directly used for the next step. **S5** (102 mg, 0.5 mmol) was dissolved in 5 mL  $\text{CH}_2\text{Cl}_2$  and HBTU (379 mg, 1 mmol, 2 eq.), benzylamine (109  $\mu\text{L}$ , 1 mmol, 2 eq.), and  $\text{Et}_3\text{N}$  (140  $\mu\text{L}$ , 1 mmol, 2 eq.) were added to the solution. After stirring at room temperature for 2 h, the reaction mixture was concentrated and directly loaded onto silica gel column chromatography to give **S6** as a colorless oil (87 mg, 60% in two steps).

Colorless oil; IR ( $\text{CHCl}_3$  solution)  $\nu$  3420, 3008, 2955, 2930, 2858, 1710, 1666, 1524, 1363, 1260, 1121, 945, 838  $\text{cm}^{-1}$ ;  $^1\text{H}$  NMR ( $\text{CDCl}_3$ , 400 Hz):  $\delta$  7.32–7.22 (m, 5H), 6.93 (br, 1H), 4.49 (dd,  $J = 6.4, 14.9$  Hz, 1H), 4.38 (dd,  $J = 5.6, 14.7$  Hz, 1H), 4.24 (q,  $J = 6.9$  Hz, 1H), 1.38 (d,  $J = 6.6$  Hz, 3H), 0.82 (s, 9H), 0.05 (s, 3H), 0.02 (s, 3H);  $^{13}\text{C}$  NMR ( $\text{CDCl}_3$ , 150 Hz):  $\delta$  174.3, 138.1, 128.7, 127.5, 127.4, 70.0, 42.9, 25.7, 22.0, 17.9; HRMS (ESI-Orbitrap) Anal. calcd. for  $\text{C}_{16}\text{H}_{28}\text{O}_2\text{NSi}$   $m/z$  294.1884  $[\text{M}+\text{H}]^+$ , found 294.1882;  $[\alpha]_{\text{D}}^{26} -17.2$  (c 2.52,  $\text{CHCl}_3$ ); HPLC: CHIRALCEL AD-H ( $\phi$  0.46 cm x 25 cm) and AD-H ( $\phi$  0.46 cm x 25 cm), 2-propanol/*n*-hexane = 2/98, flow rate 0.5 mL/min, detection 220 nm,  $t_{\text{R}} = 34.9$  min (major), 40.0 min (minor).

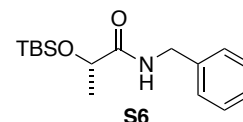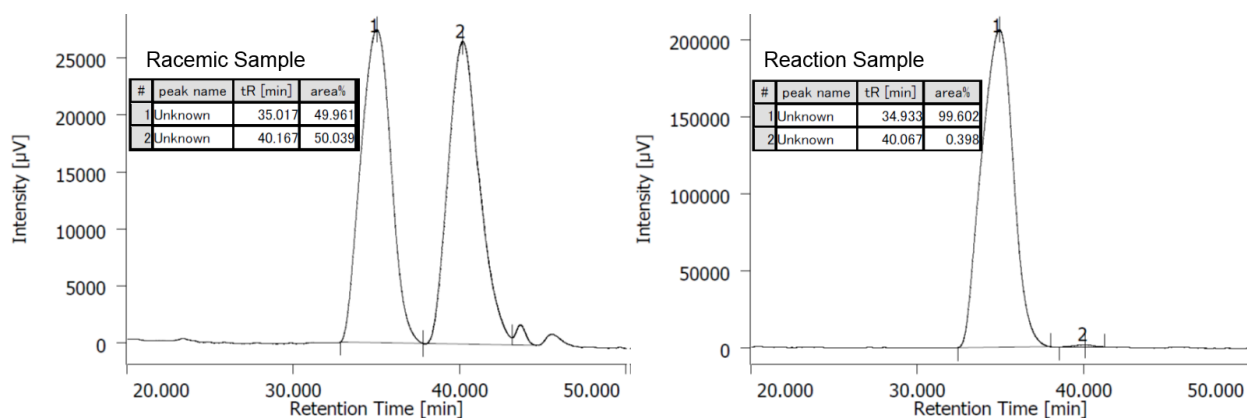

#### 4.4.2 Experimental procedure.

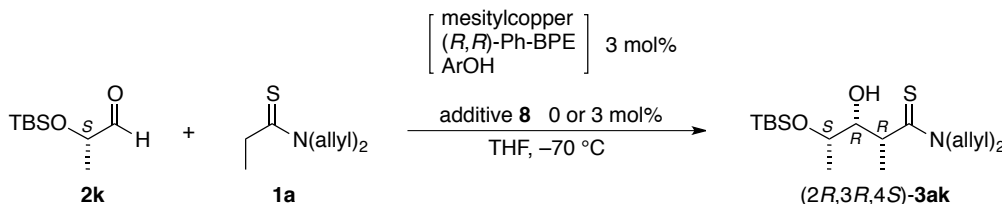

To a flame-dried 20 mL test tube equipped with a magnetic stirring bar and a 3-way glass stopcock were charged with (*R,R*)-Ph-BPE (6.1 mg, 0.012 mmol), 2,2,5,7,8-pentamethylchromanol (ArOH, 2.6 mg, 0.012 mmol) and mesitylcopper (2.2 mg, 0.012 mmol) in a dry box. To the mixture was added THF (240  $\mu\text{L}$ , 0.05 M) *via* syringe at room temperature, after 5 min of stirring at the same temperature, yellow-green solution of (*R,R*)-Ph-BPE/mesitylcopper/ArOH solution

was obtained, which was used within 15 min.

To a flame-dried 20 mL test tube equipped with a magnetic stirring bar and a 3-way glass stopcock were charged with *N,N*-diallylthiopropionamide (**1a**, 40  $\mu$ L, 0.24 mmol, 1.2 eq.), dry THF (1.8 mL or 1.86 mL, 0.1 M), and (*S*)-**2k** (44  $\mu$ L, 0.2 mmol) and additive **8** (60  $\mu$ L, 0.1 M in THF, 6  $\mu$ mol) if any, the reaction mixture was cooled to  $-70$   $^{\circ}$ C. To the resulting cooled solution was added (*R,R*)-Ph-BPE/mesitylcopper/ArOH solution (120  $\mu$ L, 6  $\mu$ mmol) prepared above dropwise to run the reaction. After certain time at the same temperature, the precooled solution of acetic acid in THF (0.1 M in THF, 1 mL, 0.1 mmol), then saturated aq.  $\text{NH}_4\text{Cl}$  were added to quench the reaction. The aqueous layer was extracted with ethyl acetate. The combined organic layers were washed with brine and dried over  $\text{Na}_2\text{SO}_4$ . The filtrate was concentrated under reduced pressure. The chemical yield and diastereomeric ratio were determined by  $^1\text{H}$  NMR of the crude mixture. The crude product was purified by silica gel column chromatography, giving the desired product as a colorless oil.

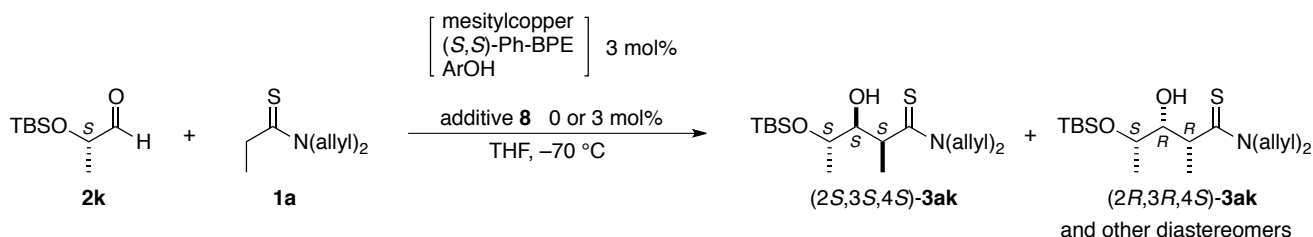

To a flame-dried 20 mL test tube equipped with a magnetic stirring bar and a 3-way glass stopcock were charged with (*S,S*)-Ph-BPE (10.1 mg, 0.02 mmol), 2,2,5,7,8-pentamethylchromanol (ArOH, 4.4 mg, 0.02 mmol) and mesitylcopper (3.6 mg, 0.02 mmol) in a dry box. To the mixture was added THF (0.4 mL, 0.05 M) *via* syringe at room temperature, after 5 min of stirring at the same temperature, yellow-green solution of (*S,S*)-Ph-BPE/mesitylcopper/ArOH solution was obtained, which was used within 15 min.

To a flame-dried 20 mL test tube equipped with a magnetic stirring bar and a 3-way glass stopcock were charged with *N,N*-diallylthiopropionamide (**1a**, 40  $\mu$ L, 0.24 mmol, 1.2 eq.), dry THF (1.6 mL or 1.7 mL, 0.1 M), and (*S*)-**2k** (44  $\mu$ L, 0.2 mmol) and additive **8** (100  $\mu$ L, 0.1 M in THF, 0.01 mmol) if any, and the reaction mixture was cooled to  $-78$   $^{\circ}$ C. To the resulting cooled solution was added (*S,S*)-Ph-BPE/mesitylcopper/ArOH solution (0.2 mL, 0.01 mmol) prepared above dropwise to run the reaction. After certain time at the same temperature, the precooled solution of acetic acid in THF (0.1 M in THF, 1 mL, 0.1 mmol), then saturated aq.  $\text{NH}_4\text{Cl}$  were added to quench the reaction. The aqueous layer was extracted with ethyl acetate. The combined organic layers were washed with brine and dried over  $\text{Na}_2\text{SO}_4$ . The filtrate was concentrated under reduced pressure. The chemical yield and diastereomeric ratio were determined by  $^1\text{H}$  NMR of the crude mixture. The crude product was purified by silica gel column chromatography to give the desired product as a colorless oil.

**(2R,3R,4S)-*N,N*-Diallyl-4-((*tert*-butyldimethylsilyl)oxy)-3-hydroxy-2-methylpentanethioamide (2R,3R,4S-3ak)**

Less polar product, colorless oil, IR ( $\text{CHCl}_3$  solution)  $\nu$  3338, 2957, 2931, 2857, 1710, 1489, 1412, 1257, 1224, 1088, 835  $\text{cm}^{-1}$ ;  $^1\text{H}$  NMR ( $\text{CDCl}_3$ , 400 Hz):  $\delta$  5.89–5.71 (m, 2H), 5.27–5.08 (m, 4H), 4.68–4.63 (m, 2H), 4.50 (dd,  $J$  = 6.0, 14.7 Hz, 1H), 4.26 (dd,  $J$  = 3.9, 17.4 Hz, 1H), 4.10 (dd,  $J$  = 2.3, 17.2 Hz, 1H), 3.65 (m, 1H), 3.52 (q,  $J$  = 6.9 Hz, 1H), 3.36 (d,  $J$  = 8.0 Hz, 1H), 1.22 (d,  $J$  = 6.0 Hz, 3H), 1.19 (d,  $J$  = 6.6 Hz, 3H), 0.85 (s, 9H), 0.07 (s, 3H), 0.03 (s, 3H);  $^{13}\text{C}$  NMR ( $\text{CDCl}_3$ , 150 Hz):  $\delta$  210.1, 130.9, 130.4, 118.5, 117.7, 76.7, 68.6, 55.1, 52.4, 41.0, 25.7, 21.2, 17.8, 13.6,  $-4.3$ ,  $-4.7$ ; HRMS (ESI-Orbitrap) Anal. calcd. for  $\text{C}_{18}\text{H}_{36}\text{O}_2\text{NSSi}$   $m/z$  358.2231  $[\text{M}+\text{H}]^+$ , found 358.2230;  $[\alpha]_{\text{D}}^{28} -68.0$  ( $c$  2.18,  $\text{CHCl}_3$ ).

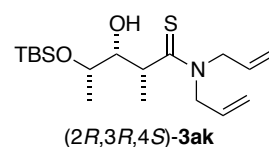

**(2S,3S,4S)-*N,N*-Diallyl-4-((*tert*-butyldimethylsilyl)oxy)-3-hydroxy-2-methylpentanethioamide (2S,3S,4S-3ak)**

More polar product, colorless oil, IR ( $\text{CHCl}_3$  solution)  $\nu$  3336, 2956, 2931, 2858, 1644, 1488, 1410, 1256, 1138, 1088, 987, 933, 837  $\text{cm}^{-1}$ ;  $^1\text{H}$  NMR ( $\text{CDCl}_3$ , 400 Hz):  $\delta$  5.90–5.72 (m, 2H), 5.28–5.12 (m, 4H), 4.85 (dd,  $J$  = 5.5, 14.7 Hz, 1H), 4.38 (dd,  $J$  = 6.2, 14.9 Hz, 2H), 4.08–4.01 (m, 1H), 3.94–3.89 (m, 1H), 3.77–3.76 (m, 1H), 3.38 (d,  $J$  = 5.7 Hz, 1H), 3.18–3.13 (m, 1H), 1.29 (d,  $J$  = 6.6 Hz, 3H), 1.18 (d,  $J$  = 6.4 Hz, 3H), 0.86 (s, 9H), 0.06 (s, 3H), 0.02 (s, 3H);  $^{13}\text{C}$  NMR ( $\text{CDCl}_3$ , 150 Hz):  $\delta$  210.1, 131.2, 130.7,

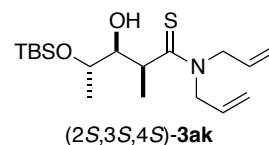



118.6, 118.2, 77.6, 69.9, 55.2, 52.8, 44.0, 16.0, 20.5, 18.2, 17.6, -3.9, -4.5; HRMS (ESI-Orbitrap) Anal. calcd. for  $C_{18}H_{35}O_2NNaSSi$   $m/z$  380.2050  $[M+Na]^+$ , found 380.2043;  $[\alpha]_D^{27}$  13.2 ( $c$  0.28,  $CHCl_3$ ).

#### 4.4.3 Determination of the absolute configuration

Relative and absolute configuration of aldol adduct **3ak** was determined by converting into the reported 5-membered lactone **S9** by following procedures.

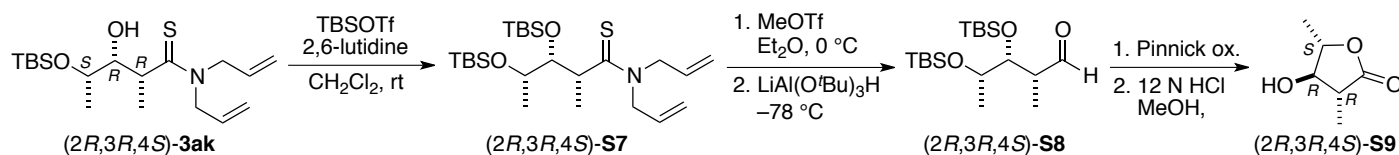

To a stirred solution of  $(2R,3R,4S)\text{-3ak}$  (357 mg, 1 mmol, obtained with the  $(R)$ -catalyst) in 10 mL of  $CH_2Cl_2$ , 2,6-lutidine (233  $\mu\text{L}$ , 2 mmol, 2 eq.) and TBSOTf (459  $\mu\text{L}$ , 2 mmol, 2 eq.) were added at 0  $^\circ\text{C}$  and the reaction mixture was stirred at room temperature for 2 h. Saturated  $NH_4Cl$  aq. was added and the mixture was extracted with  $CH_2Cl_2$ . The combined organic layers were washed with brine and dried over  $Na_2SO_4$ . The filtrate was concentrated under reduced pressure and the resulting residue was purified by column chromatography, giving  $(2R,3R,4S)\text{-S7}$  as a colorless oil (462 mg, 98% yield).

To a stirred solution of  $(2R,3R,4S)\text{-S7}$  (450 mg, 0.955 mmol) in 10 mL of ether, MeOTf (209  $\mu\text{L}$ , 1.91 mmol, 2 eq.) was added at 0  $^\circ\text{C}$  and the reaction mixture was stirred at room temperature for 5 h. The reaction mixture was cooled to -78  $^\circ\text{C}$  and  $LiAlH(O^tBu)_3$  (1.91 mL, 1.0 M in THF, 1.91 mmol, 2 eq.) was added. After stirring at the same temperature for 4 h, silica gel (9.55 g, 10 g/1 mmol starting material) was added slowly with  $CH_2Cl_2$  at -78  $^\circ\text{C}$ . The resulting mixture was slowly warmed to room temperature for 1.5 h, and filtered through a short pad of silica gel with ethyl acetate as eluent. The filtrate was concentrated under reduced pressure and the crude material was purified by column chromatography to give aldehyde  $(2R,3R,4S)\text{-S8}$  as a colorless oil (288 mg, 84% yield).

To a stirred solution of  $(2R,3R,4S)\text{-S8}$  (180 mg, 0.5 mmol) in  $tBuOH/H_2O$  (1.2 mL, 5:1), 2-methyl-2-butene (530  $\mu\text{L}$ , 5 mmol, 10 eq.),  $NaClO_2$  (136 mg, 1.5 mmol, 3 eq.), and  $NaH_2PO_4 \cdot 2H_2O$  (234 mg, 1.5 mmol, 3 eq.) were added. After stirring at room temperature for 30 min, the reaction mixture was diluted with ethyl acetate, washed with 1N HCl aq. and brine, dried over  $Na_2SO_4$ . Filtration and concentration gave crude acid, which was used directly for the next step. The crude acid was dissolved in 2 mL MeOH and several drops of 12 N HCl was added till the starting material was consumed in 30 min. Sat.  $NaHCO_3$  aq. was added to neutralize. MeOH was removed under reduced pressure, and the resulting residue was dissolved in EtOAc, and the resulting mixture was washed with brine and dried over  $Na_2SO_4$ . The crude product was purified by silica gel column chromatography to give lactone  $(2R,3R,4S)\text{-S9}$  as a colorless oil (58 mg, 90% yield in two steps).

Configuration of  $(2R,3R,4S)\text{-S9}$  was confirmed by NOE analysis and reported NMR data.<sup>4</sup>

#### $(2R,3R,4S)\text{-N,N-Diallyl-3,4-bis}((tert\text{-butyldimethylsilyl})\text{oxy})\text{-2-methylpentanethioamide ((2R,3R,4S)-S7)}$

Colorless oil; IR ( $CHCl_3$  solution)  $\nu$  2957, 2930, 2857, 1472, 1408, 1254, 1149, 1104, 1033, 835  $cm^{-1}$ ;  $^1H$  NMR ( $CDCl_3$ , 400 Hz):  $\delta$  5.91–5.71 (m, 2H), 5.26–5.09 (m, 4H), 4.88 (dd,  $J$  = 5.5, 14.6 Hz, 1H), 4.41–4.27 (m, 3H), 4.06 (dd,  $J$  = 4.8, 17.2 Hz, 1H), 3.80–3.76 (m, 1H), 2.95–2.87 (m, 1H), 1.24 (d, 3H), 0.97 (d, 3H), 0.89 (s, 9H), 0.85 (s, 9H), 0.12 (s, 6H), 0.06 (s, 3H), 0.01 (s, 3H);  $^{13}C$  NMR ( $CDCl_3$ , 150 Hz):  $\delta$  209.0, 131.3, 131.0, 118.3, 117.9, 82.3, 70.6, 55.3, 52.5, 45.6, 26.3, 26.0, 20.8, 18.5, 18.1, 17.8, -3.5, -4.1, -4.6, -4.8; HRMS (ESI-Orbitrap) Anal. calcd. for  $C_{24}H_{50}O_2NSSi_2$   $m/z$  472.3095  $[M+H]^+$ , found 472.3084;  $[\alpha]_D^{28}$  -61.5 ( $c$  1.10,  $CHCl_3$ ).

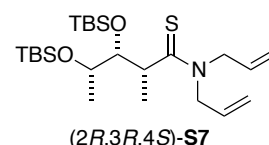

#### $(2R,3R,4S)\text{-3,4-Bis}((tert\text{-butyldimethylsilyl})\text{oxy})\text{-2-methylpentanal ((2R,3R,4S)-S8)}$

Colorless oil, IR ( $CHCl_3$  solution)  $\nu$  2957, 2931, 2958, 1717, 1472, 1362, 1257, 1104, 839  $cm^{-1}$ ;  $^1H$  NMR ( $CDCl_3$ , 400 Hz):  $\delta$  9.71 (s, 1H), 3.95 (dd,  $J$  = 2.7, 6.2 Hz, 1H), 3.70–3.64 (m, 1H), 2.72 (qd,  $J$  = 3.2, 6.9

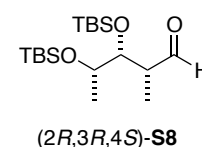

<sup>4</sup>Nebot, J.; Figueras, S.; Romea, P.; Urpí, F.; Ji, Y. *Tetrahedron* **2006**, 62, 11090.

Hz, 1H), 1.15 (d,  $J = 6.2$  Hz, 3H), 1.06 (d,  $J = 7.1$  Hz, 3H), 0.83 (s, 18H), 0.05 (s, 3H), 0.04 (s, 3H), 0.02 (s, 3H), -0.05 (s, 3H);  $^{13}\text{C}$  NMR ( $\text{CDCl}_3$ , 150 Hz):  $\delta$  205.2, 76.1, 70.0, 25.8, 20.7, 18.2, 18.0, 7.4, -4.1, -4.2, -4.9; HRMS (ESI-Orbitrap) Anal. calcd. for  $\text{C}_{18}\text{H}_{40}\text{O}_3\text{NaSi}_2$   $m/z$  383.2408  $[\text{M}+\text{Na}]^+$ , found 383.2399;  $[\alpha]_{\text{D}}^{28} -16.6$  (c 1.96,  $\text{CHCl}_3$ ).

#### (2R,3R,4S)-4-Hydroxy-3,5-dimethyldihydrofuran-2(3H)-one ((2R,3R,4S)-S9)

Colorless oil, IR ( $\text{CHCl}_3$  solution)  $\nu$  3615, 3399, 3025, 2982, 2935, 1780, 1455, 1213, 1180, 1064, 963  $\text{cm}^{-1}$ ;  $^1\text{H}$  NMR ( $\text{CDCl}_3$ , 400 Hz):  $\delta$  4.22–4.16 (m, 1H), 3.71–3.66 (m, 1H), 2.79 (d,  $J = 5.3$  Hz, 1H), 2.62–2.54 (m, 1H), 1.44 (d,  $J = 6.2$  Hz, 3H), 1.28 (d,  $J = 7.1$  Hz, 3H);  $^{13}\text{C}$  NMR ( $\text{CDCl}_3$ , 150 Hz):  $\delta$  176.2, 80.6, 79.7, 43.9, 18.0, 12.5; HRMS (ESI-Orbitrap) Anal. calcd. for  $\text{C}_6\text{H}_{10}\text{O}_3\text{Na}$   $m/z$  153.0522  $[\text{M}+\text{Na}]^+$ , found 153.0519;  $[\alpha]_{\text{D}}^{28} -30.4$  (c 0.64,  $\text{CHCl}_3$ ). The absolute configuration was determined by NOE experiment, and further confirmed by comparison with reported data. ( $[\alpha]_{\text{D}} -23.5$  (c 1.0,  $\text{CHCl}_3$ );  $^1\text{H}$  NMR ( $\text{CDCl}_3$ , 300 MHz):  $\delta$  4.22 (dq,  $J = 7.6, 6.1$  Hz, 1H), 3.76–3.67 (m, 1H), 2.75 (br, 1H), 2.60 (dq,  $J = 9.2, 7.2$  Hz, 1H), 1.46 (d,  $J = 6.1$  Hz, 3H), 1.31 (d,  $J = 7.2$  Hz, 3H);  $^{13}\text{C}$  NMR ( $\text{CDCl}_3$ , 75.4 MHz):  $\delta$  176.7, 80.5, 80.0, 43.9, 18.0, 12.5.)<sup>4</sup>

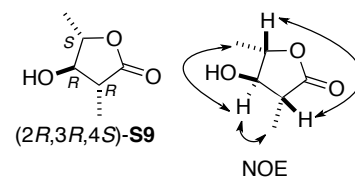

(2S,3S,4S)-3ak (the major diastereomer obtained with the (S)-catalyst) was converted to lactone (2S,3S,4S)-S9 by following the identical procedure and its configuration was confirmed by comparing with the reported NMR data.<sup>5</sup>

#### (2S,3S,4S)-N,N-Diallyl-3,4-bis((tert-butyldimethylsilyl)oxy)-2-methylpentanethioamide ((2S,3S,4S)-S7)

Colorless oil; IR ( $\text{CHCl}_3$  solution)  $\nu$  2958, 2929, 2857, 1711, 1255, 1103, 837  $\text{cm}^{-1}$ ;  $^1\text{H}$  NMR ( $\text{CDCl}_3$ , 400 Hz):  $\delta$  5.92–5.80 (m, 2H), 5.23–5.14 (m, 4H), 4.65–4.47 (m, 3H), 4.43 (q,  $J = 4.4$  Hz, 1H), 4.05–3.99 (m, 1H), 3.88–3.83 (m, 1H), 3.34–3.28 (m, 1H), 1.17 (d,  $J = 6.9$  Hz, 3H), 1.11 (d,  $J = 6.4$  Hz, 3H), 0.89 (s, 9H), 0.84 (s, 9H), 0.17 (s, 3H), 0.07 (s, 3H), 0.04 (s, 3H), -0.01 (s, 3H);  $^{13}\text{C}$  NMR ( $\text{CDCl}_3$ , 150 Hz):  $\delta$  211.1, 132.1, 131.6, 118.2, 118.0, 77.8, 71.6, 55.9, 53.0, 42.2, 26.0, 20.2, 18.5, 18.2, 17.6, -4.0, -4.4, -4.5, -4.7; HRMS (ESI-Orbitrap) Anal. calcd. for  $\text{C}_{24}\text{H}_{50}\text{O}_2\text{NSSi}_2$   $m/z$  472.3095  $[\text{M}+\text{H}]^+$ , found 472.3093;  $[\alpha]_{\text{D}}^{27} 38.8$  (c 0.80,  $\text{CHCl}_3$ ).

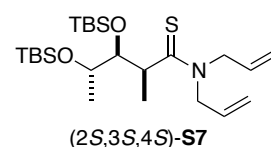

#### (2S,3S,4S)-3,4-Bis((tert-butyldimethylsilyl)oxy)-2-methylpentanal ((2S,3S,4S)-S8)

Colorless oil, IR ( $\text{CHCl}_3$  solution)  $\nu$  2958, 2929, 2857, 1711, 1255, 1103, 837  $\text{cm}^{-1}$ ;  $^1\text{H}$  NMR ( $\text{CDCl}_3$ , 400 Hz):  $\delta$  9.57 (d,  $J = 3.2$  Hz, 1H), 3.88–3.82 (m, 1H), 3.78–3.75 (m, 1H), 2.58–2.54 (m, 1H), 1.12 (d,  $J = 6.4$  Hz, 3H), 1.06 (d,  $J = 6.9$  Hz, 3H), 0.87 (s, 9H), 0.84 (s, 9H), 0.05 (d, 6H), 0.03 (s, 3H), 0.01 (s, 3H);  $^{13}\text{C}$  NMR ( $\text{CDCl}_3$ , 150 Hz):  $\delta$  202.5, 75.3, 70.7, 48.0, 25.7, 18.0, 17.4, 11.4, -4.5, -4.6, -4.7, -4.8; HRMS (ESI-Orbitrap) Anal. calcd. for  $\text{C}_{18}\text{H}_{40}\text{O}_3\text{NaSi}_2$   $m/z$  383.2408  $[\text{M}+\text{Na}]^+$ , found 383.2404;  $[\alpha]_{\text{D}}^{28} -0.6$  (c 0.71,  $\text{CHCl}_3$ ).

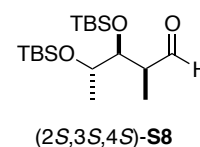

#### (2S,3S,4S)-4-Hydroxy-3,5-dimethyldihydrofuran-2(3H)-one ((2S,3S,4S)-S9)

colorless oil, IR ( $\text{CHCl}_3$  solution)  $\nu$  3503, 3406, 3023, 3016, 1709, 1418, 1363, 1227, 1090, 902  $\text{cm}^{-1}$ ;  $^1\text{H}$  NMR ( $\text{CDCl}_3$ , 400 Hz):  $\delta$  4.68–4.61 (m, 1H), 4.14–4.10 (m, 1H), 2.64–2.57 (m, 1H), 2.03 (dd,  $J = 1.8, 4.8$  Hz, 1H), 1.38 (dd,  $J = 1.8, 6.4$  Hz, 3H), 1.28 (dd,  $J = 2.0, 7.6$  Hz, 3H);  $^{13}\text{C}$  NMR ( $\text{CDCl}_3$ , 150 Hz):  $\delta$  177.9, 77.8, 75.4, 43.2, 13.8, 13.0; HRMS (ESI-Orbitrap) Anal. calcd. for  $\text{C}_6\text{H}_{10}\text{O}_3\text{Na}$   $m/z$  153.0522  $[\text{M}+\text{Na}]^+$ , found 153.0519;  $[\alpha]_{\text{D}}^{28} -71.7$  (c 0.30,  $\text{CHCl}_3$ ). The absolute configuration was confirmed by comparison with the reported data (typical chemical shifts in  $^1\text{H}$  NMR:  $\delta$  = 4.12 (dd,  $J = 5.0, 5.0$  Hz, 1H), 4.66 (dq,  $J = 6.6$  Hz, 1H)).<sup>5</sup>

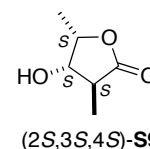

<sup>5</sup>Nakata, M.; Takao, H.; Ikegama, Y.; Sakai, T.; Tatsuta, K.; Kinoshita, M. *Bull. Chem. Soc. Jpn.* **1981**, *54*, 1749.

#### 4.4.4 Control experiment

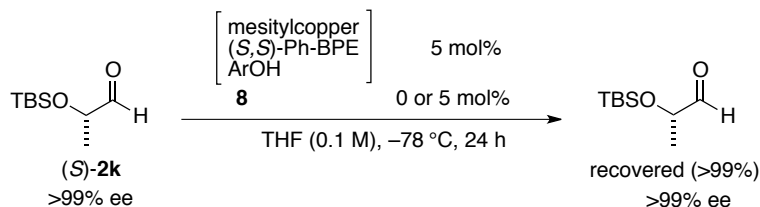

To a flame-dried 20 mL test tube equipped with a magnetic stirring bar and a 3-way glass stopcock were charged with (S,S)-Ph-BPE (10.1 mg, 0.02 mmol), 2,2,5,7,8-pentamethylchromanol (ArOH, 4.4 mg, 0.02 mmol) and mesitylcopper (3.6 mg, 0.02 mmol) in a dry box. To the mixture was added THF (0.4 mL, 0.05 M) *via* syringe at room temperature, after 5 min of stirring at the same temperature, yellow-green solution of (S,S)-Ph-BPE/mesitylcopper/ArOH solution was obtained, which was used within 15 min.

To a flame-dried 20 mL test tube equipped with a magnetic stirring bar and a 3-way glass stopcock were charged with (S)-2k (44  $\mu$ L, 0.2 mmol), dry THF (1.76 mL, 0.1 M). The reaction mixture was cooled to  $-78^\circ\text{C}$ . To the resulting cooled solution was added Ph-BPE/mesitylcopper/ArOH solution (0.2 mL, 0.01 mmol) prepared above dropwise to run the reaction. After 24 h at the same temperature, the precooled solution of acetic acid in THF (0.1 M in THF, 1 mL, 0.1 mmol), then saturated aq.  $\text{NH}_4\text{Cl}$  were added to quench the reaction. The aqueous layer was extracted with ethyl acetate. The combined organic layers were washed with brine and dried over  $\text{Na}_2\text{SO}_4$ . The filtrate was concentrated under reduced pressure.  $^1\text{H}$  NMR of the crude mixture showed complete recovery of (S)-2k. The enantiopurity of the recovered aldehyde was determined to be >99% by HPLC analysis after transforming to *N*-benzyl-2-((*tert*-butyldimethylsilyl)oxy)propanamide as mentioned before.

#### 5. Calculated Structure of Aldol Adducts

All calculations were performed using Gaussian 09.<sup>6</sup> Computed XYZ-coordinates are summarized in Table S1-9.

**Table S1.** XYZ-coordinates and the structure of 3aI' optimized at PM2 with a 6-31G(d,p) basis set.

| Number | atom | X         | Y         | Z         |
|--------|------|-----------|-----------|-----------|
| 1      | C    | 2.226447  | 0.354306  | -0.343339 |
| 2      | C    | 3.205723  | -0.336044 | -1.299125 |
| 3      | H    | 3.630872  | -1.239154 | -0.858702 |
| 4      | H    | 2.718419  | -0.596946 | -2.241958 |
| 5      | H    | 4.037235  | 0.329940  | -1.530408 |
| 6      | C    | 2.919521  | 0.563412  | 1.002891  |
| 7      | H    | .312801   | 1.157422  | 1.686001  |
| 8      | H    | 3.133531  | -0.395994 | 1.473194  |
| 9      | H    | 3.861987  | 1.093603  | 0.857906  |
| 10     | C    | 0.974272  | -0.535103 | -0.191164 |
| 11     | C    | -0.065366 | 0.033843  | 0.808077  |
| 12     | C    | 1.410599  | 0.369493  | 0.172952  |
| 13     | N    | -2.121345 | -0.612174 | -0.428429 |
| 14     | C    | -3.426175 | -0.289067 | -0.994002 |
| 15     | H    | -3.820028 | -1.180961 | -1.474486 |
| 16     | H    | -4.107576 | 0.047721  | -0.212955 |

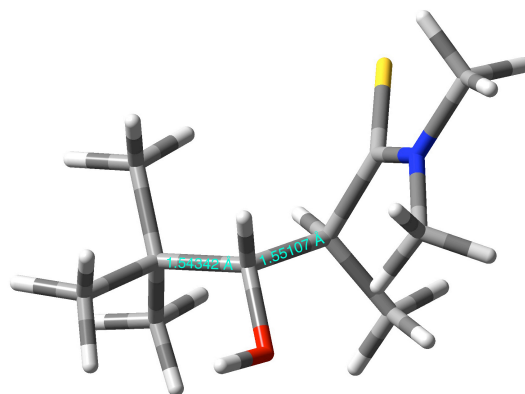

<sup>6</sup>M. J. Frisch, G. W. Trucks, H. B. Schlegel, G. E. Scuseria, M. A. Robb, J. R. Cheeseman, G. Scalmani, V. Barone, B. Mennucci, G. A. Petersson, H. Nakatsuji, M. Caricato, X. Li, H. P. Hratchian, A. F. Izmaylov, J. Bloino, G. Zheng, J. L. Sonnenberg, M. Hada, M. Ehara, K. Toyota, R. Fukuda, J. Hasegawa, M. Ishida, T. Nakajima, Y. Honda, O. Kitao, H. Nakai, T. Vreven, J. A. Montgomery, Jr., J. E. Peralta, F. Ogliaro, M. Bearpark, J. J. Heyd, E. Brothers, K. N. Kudin, V. N. Staroverov, R. Kobayashi, J. Normand, K. Raghavachari, A. Rendell, J. C. Burant, S. S. Iyengar, J. Tomasi, M. Cossi, N. Rega, J. M. Millam, M. Klene, J. E. Knox, J. B. Cross, V. Bakken, C. Adamo, J. Jaramillo, R. Gomperts, R. E. Stratmann, O. Yazyev, A. J. Austin, R. Cammi, C. Pomelli, J. W. Ochterski, R. L. Martin, K. Morokuma, V. G. Zakrzewski, G. A. Voth, P. Salvador, J. J. Dannenberg, S. Dapprich, A. D. Daniels, O. Farkas, J. B. Foresman, J. V. Ortiz, J. Cioslowski, and D. J. Fox, Gaussian, Inc., Wallingford CT, 2009.

|    |   |           |           |           |
|----|---|-----------|-----------|-----------|
| 17 | C | -1.754320 | -2.023405 | -0.487838 |
| 18 | H | -0.752882 | -2.190139 | -0.115735 |
| 19 | H | -2.460007 | -2.613677 | 0.100579  |
| 20 | S | -1.980614 | 1.930740  | 0.271028  |
| 21 | C | -0.231274 | -0.775613 | 2.101377  |
| 22 | H | -0.910128 | -0.233505 | 2.759309  |
| 23 | H | -0.627604 | -1.773182 | 1.936826  |
| 24 | H | 0.729687  | -0.879650 | 2.601052  |
| 25 | O | 1.323414  | -1.860061 | 0.244303  |
| 26 | H | 1.846808  | -2.259783 | -0.462102 |
| 27 | H | 0.512449  | -0.595032 | -1.187874 |
| 28 | H | 0.292664  | 1.009203  | 1.124130  |
| 29 | C | 1.816566  | 1.693855  | -0.958601 |
| 30 | H | 1.376767  | 1.546210  | -1.947137 |
| 31 | H | 1.087937  | 2.226898  | -0.349442 |
| 32 | H | 2.694223  | 2.331592  | -1.074432 |
| 33 | H | -1.804622 | -2.361644 | -1.523963 |
| 34 | H | -3.329376 | 0.516896  | -1.719045 |

**Table S2.** XYZ-coordinates and the structure of **3aa'** optimized at PM2 with a 6-31G(d,p) basis set.

| Number | atom | X         | Y         | Z         |
|--------|------|-----------|-----------|-----------|
| 1      | C    | -2.308897 | -0.571191 | -0.540235 |
| 2      | C    | -3.224416 | 0.018893  | -1.611792 |
| 3      | H    | -3.733804 | 0.912435  | -1.244643 |
| 4      | H    | -2.667382 | 0.282354  | -2.512374 |
| 5      | H    | -3.998133 | -0.694483 | -1.893132 |
| 6      | C    | -3.099863 | -0.890196 | 0.725151  |
| 7      | H    | -2.495168 | -1.414299 | 1.463722  |
| 8      | H    | -3.469766 | 0.029530  | 1.176635  |
| 9      | H    | -3.953923 | -1.524743 | 0.488494  |
| 10     | C    | -1.120904 | 0.358308  | -0.262322 |
| 11     | C    | -0.088531 | -0.288419 | 0.694899  |
| 12     | C    | 1.297880  | -0.436404 | 0.076653  |
| 13     | N    | 2.007236  | 0.673464  | -0.232331 |
| 14     | C    | 3.356524  | 0.520087  | -0.763838 |
| 15     | H    | 3.791342  | 1.509493  | -0.880341 |
| 16     | H    | 3.960058  | -0.077681 | -0.083440 |
| 17     | C    | 1.534973  | 2.050848  | -0.136469 |
| 18     | H    | 0.496004  | 2.095921  | 0.159702  |
| 19     | H    | 2.141569  | 2.601094  | 0.585337  |
| 20     | S    | 1.911572  | -1.964956 | -0.165396 |
| 21     | C    | -0.035051 | 0.319680  | 2.101451  |
| 22     | H    | 0.651813  | -0.270659 | 2.707529  |
| 23     | H    | 0.296163  | 1.353722  | 2.108499  |
| 24     | H    | -1.020749 | 0.286903  | 2.561148  |
| 25     | O    | -1.559096 | 1.603324  | 0.308069  |
| 26     | H    | -2.101330 | 2.043745  | -0.359348 |
| 27     | H    | -0.630356 | 0.558014  | -1.225461 |

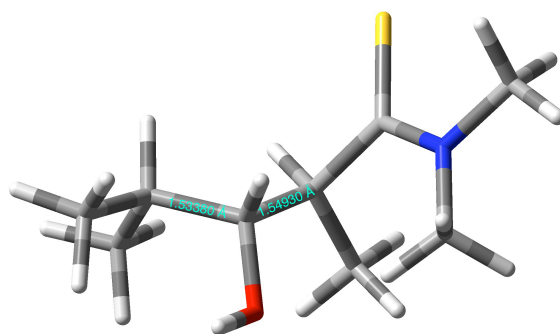

|    |   |           |           |           |
|----|---|-----------|-----------|-----------|
| 28 | H | -0.397170 | -1.323763 | 0.825373  |
| 29 | H | 1.640924  | 2.531698  | -1.110629 |
| 30 | H | 3.332566  | 0.005935  | -1.724544 |
| 31 | H | -1.875986 | -1.496386 | -0.935415 |

**Table S3.** XYZ-coordinates and the structure of **3ab'** optimized at PM2 with a 6-31G(d,p) basis set.

| Number | atom | X         | Y         | Z         |
|--------|------|-----------|-----------|-----------|
| 1      | C    | 0.194026  | -0.655602 | -0.122301 |
| 2      | C    | -0.794310 | 0.124714  | 0.781314  |
| 3      | C    | -2.071889 | 0.535796  | 0.057791  |
| 4      | N    | -2.928621 | -0.421683 | -0.366210 |
| 5      | C    | -4.177191 | -0.016935 | -1.001591 |
| 6      | H    | -4.763688 | -0.910356 | -1.200157 |
| 7      | H    | -4.727761 | 0.656008  | -0.347060 |
| 8      | C    | -2.705745 | -1.862708 | -0.306967 |
| 9      | H    | -1.721508 | -2.098863 | 0.073625  |
| 10     | H    | -3.460969 | -2.328277 | 0.329124  |
| 11     | S    | -2.390272 | 2.155756  | -0.156833 |
| 12     | C    | -1.079084 | -0.519005 | 2.143544  |
| 13     | H    | -1.706059 | 0.159222  | 2.722048  |
| 14     | H    | -1.582746 | -1.477991 | 2.067739  |
| 15     | H    | -0.147779 | -0.678492 | 2.683299  |
| 16     | O    | 0.370316  | -1.973667 | 0.424268  |
| 17     | H    | 0.901429  | -2.472085 | -0.210646 |
| 18     | H    | -0.240265 | -0.739829 | -1.129060 |
| 19     | H    | -0.325598 | 1.083790  | 0.993404  |
| 20     | H    | -2.799774 | -2.278754 | -1.311735 |
| 21     | H    | -3.977961 | 0.514723  | -1.932011 |
| 22     | C    | 1.534524  | 0.072940  | -0.266277 |
| 23     | C    | 2.285447  | 0.205279  | 1.060176  |
| 24     | C    | 2.429056  | -0.597136 | -1.313682 |
| 25     | H    | 1.291886  | 1.079340  | -0.632591 |
| 26     | C    | 3.606910  | 0.953901  | 0.882171  |
| 27     | H    | 2.476787  | -0.797387 | 1.452491  |
| 28     | H    | 1.669167  | 0.722891  | 1.798220  |
| 29     | C    | 3.743613  | 0.159376  | -1.500566 |
| 30     | H    | 2.665978  | -1.618011 | -0.989977 |
| 31     | H    | 1.894775  | -0.675026 | -2.265482 |
| 32     | C    | 4.488187  | 0.291080  | -0.174044 |
| 33     | H    | 4.135528  | 1.009896  | 1.836346  |
| 34     | H    | 3.395890  | 1.983831  | 0.577825  |
| 35     | H    | 4.366960  | -0.346084 | -2.241561 |
| 36     | H    | 3.527092  | 1.156771  | -1.895106 |
| 37     | H    | 5.410899  | 0.859029  | -0.311363 |
| 38     | H    | 4.778618  | -0.705530 | 0.173878  |

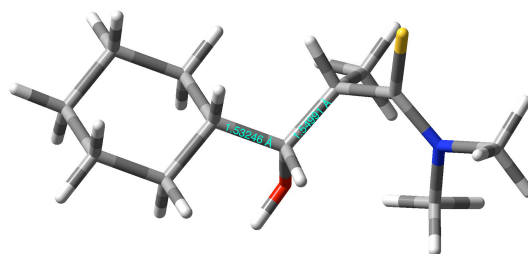

**Table S4.** XYZ-coordinates and the structure of **3ba'** optimized at PM2 with a 6-31G(d,p) basis set.

| Number | atom | X         | Y         | Z         |
|--------|------|-----------|-----------|-----------|
| 1      | C    | -2.423420 | -0.301391 | 0.739594  |
| 2      | C    | -3.414940 | -1.459521 | 0.637663  |
| 3      | H    | -3.899157 | -1.476811 | -0.341046 |
| 4      | H    | -2.924336 | -2.420722 | 0.799551  |
| 5      | H    | -4.204597 | -1.357279 | 1.381114  |
| 6      | C    | -3.120378 | 1.027623  | 0.463347  |
| 7      | H    | -2.463294 | 1.877959  | 0.640149  |
| 8      | H    | -3.457091 | 1.065159  | -0.571986 |
| 9      | H    | -3.989042 | 1.142157  | 1.111815  |
| 10     | C    | -1.219995 | -0.527939 | -0.183800 |
| 11     | C    | -0.121275 | 0.547360  | 0.017330  |
| 12     | C    | 1.209297  | -0.050018 | 0.461089  |
| 13     | O    | 1.939979  | -0.759874 | -0.431366 |
| 14     | C    | 3.248044  | -1.264852 | -0.032956 |
| 15     | H    | 3.748935  | -1.645093 | -0.920096 |
| 16     | H    | 3.831085  | -0.463341 | 0.413485  |
| 17     | C    | 1.466951  | -1.254189 | -1.721079 |
| 18     | H    | 0.436804  | -0.978022 | -1.900191 |
| 19     | H    | 2.093937  | -0.860374 | -2.522911 |
| 20     | S    | 1.736850  | 0.218557  | 2.015960  |
| 21     | C    | 0.020853  | 1.558665  | -1.132147 |
| 22     | H    | 0.309522  | 1.068456  | -2.059691 |
| 23     | H    | -0.963466 | 1.990779  | -1.317946 |
| 24     | O    | -1.617792 | -0.528329 | -1.565831 |
| 25     | H    | -2.199426 | -1.289734 | -1.690157 |
| 26     | H    | -0.797612 | -1.511396 | 0.066868  |
| 27     | H    | -0.418376 | 1.130035  | 0.888924  |
| 28     | H    | 1.542070  | -2.343676 | -1.730700 |
| 29     | H    | 3.149221  | -2.059243 | 0.708517  |
| 30     | H    | -2.017582 | -0.289524 | 1.756785  |
| 31     | C    | 1.017920  | 2.663068  | -0.796860 |
| 32     | H    | 1.046021  | 3.406751  | -1.593133 |
| 33     | H    | 0.747599  | 3.167102  | 0.131028  |
| 34     | H    | 2.023331  | 2.262836  | -0.672609 |

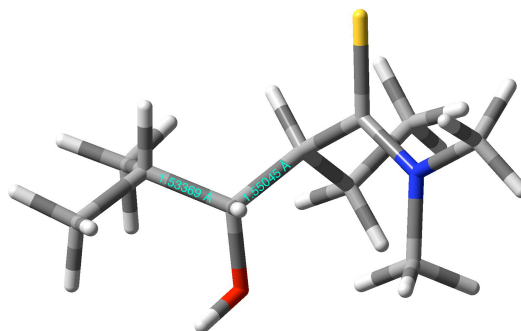**Table S5.** XYZ-coordinates and the structure of **3ac'** optimized at PM2 with a 6-31G(d,p) basis set.

| Number | atom | X         | Y         | Z         |
|--------|------|-----------|-----------|-----------|
| 1      | C    | 1.876078  | -0.376656 | 0.616191  |
| 2      | C    | 3.131396  | 0.143653  | -0.109447 |
| 3      | C    | 0.536275  | -0.144995 | -0.088184 |
| 4      | C    | -0.627726 | -0.078824 | 0.906316  |
| 5      | C    | -1.904490 | 0.442083  | 0.239224  |
| 6      | N    | -2.861795 | -0.412123 | -0.187131 |
| 7      | C    | -4.135279 | 0.128305  | -0.647599 |
| 8      | H    | -4.855689 | -0.686035 | -0.677810 |
| 9      | H    | -4.470770 | 0.903043  | 0.035996  |

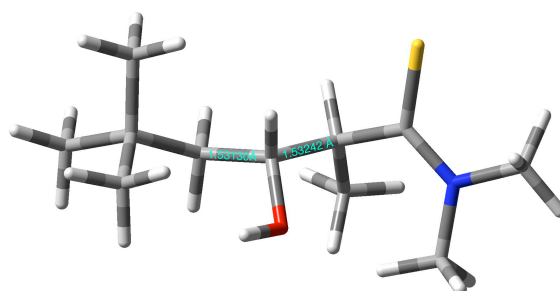

|    |   |           |           |           |
|----|---|-----------|-----------|-----------|
| 10 | C | -2.679959 | -1.837855 | -0.456299 |
| 11 | H | -1.629701 | -2.079736 | -0.506008 |
| 12 | H | -3.191482 | -2.444736 | 0.292598  |
| 13 | S | -2.079259 | 2.095094  | 0.113811  |
| 14 | C | -0.750604 | -1.328450 | 1.787006  |
| 15 | H | -1.721627 | -1.356433 | 2.280644  |
| 16 | H | -0.615195 | -2.253702 | 1.234614  |
| 17 | H | 0.011435  | -1.296964 | 2.564845  |
| 18 | O | 0.244801  | -1.204785 | -1.013383 |
| 19 | H | 0.881035  | -1.147502 | -1.734934 |
| 20 | H | 0.543137  | 0.814154  | -0.616849 |
| 21 | H | -0.369516 | 0.749244  | 1.567359  |
| 22 | H | 3.114478  | -2.051318 | -1.432643 |
| 23 | H | -4.035707 | 0.573382  | -1.639048 |
| 24 | H | 1.852450  | 0.095094  | 1.603997  |
| 25 | H | 1.971292  | -1.454297 | 0.780470  |
| 26 | C | 4.359463  | -0.385661 | 0.634475  |
| 27 | H | 5.278219  | -0.002163 | 0.187541  |
| 28 | H | 4.339129  | -0.078744 | 1.681288  |
| 29 | H | 4.394533  | -1.475836 | 0.601500  |
| 30 | C | 3.158662  | 1.673525  | -0.086306 |
| 31 | H | 2.291628  | 2.103241  | -0.588475 |
| 32 | H | 3.169612  | 2.042573  | 0.940370  |
| 33 | H | 4.053118  | 2.045916  | -0.588507 |
| 34 | C | 3.188879  | -0.340048 | -1.560261 |
| 35 | H | 3.105877  | -1.427397 | -1.618893 |
| 36 | H | 2.401128  | 0.115000  | -2.165336 |
| 37 | H | 4.137713  | -0.055607 | -2.017405 |

**Table S6.** XYZ-coordinates and the structure of **3af'** optimized at PM2 with a 6-31G(d,p) basis set.

| Number | atom | X         | Y         | Z         |
|--------|------|-----------|-----------|-----------|
| 1      | C    | 2.117108  | -0.180179 | 0.585435  |
| 2      | C    | 3.319272  | -0.055162 | -0.355549 |
| 3      | H    | 3.230554  | -0.840599 | -1.114081 |
| 4      | C    | 0.760989  | 0.005486  | -0.088407 |
| 5      | C    | -0.405227 | -0.155801 | 0.893606  |
| 6      | C    | -1.710647 | 0.386247  | 0.301892  |
| 7      | N    | -2.602427 | -0.446769 | -0.280468 |
| 8      | C    | -3.906325 | 0.076142  | -0.670724 |
| 9      | H    | -4.566619 | -0.768256 | -0.855162 |
| 10     | H    | -4.303288 | 0.697797  | 0.126882  |
| 11     | C    | -2.323307 | -1.795631 | -0.770315 |
| 12     | H    | -1.259143 | -1.966312 | -0.817911 |
| 13     | H    | -2.816678 | -2.545175 | -0.149360 |
| 14     | S    | -1.999947 | 2.020804  | 0.451201  |
| 15     | C    | -0.466415 | -1.532681 | 1.569478  |
| 16     | H    | -1.457696 | -1.712160 | 1.984329  |
| 17     | H    | -0.220561 | -2.347382 | 0.893828  |

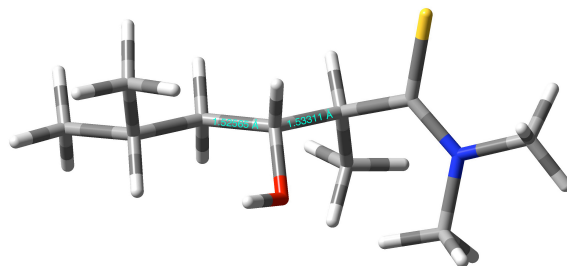

|    |   |           |           |           |
|----|---|-----------|-----------|-----------|
| 18 | H | 0.242564  | -1.564694 | 2.395386  |
| 19 | O | 0.585573  | -0.950002 | -1.146412 |
| 20 | H | 1.161913  | -0.685784 | -1.873876 |
| 21 | H | 0.683812  | 1.021399  | -0.488977 |
| 22 | H | -0.197658 | 0.573894  | 1.677120  |
| 23 | H | -2.715764 | -1.871534 | -1.784289 |
| 24 | H | -3.828353 | 0.690197  | -1.569465 |
| 25 | H | 2.212310  | 0.563719  | 1.384264  |
| 26 | H | 2.145164  | -1.167008 | 1.053694  |
| 27 | C | 4.613979  | -0.305576 | 0.413869  |
| 28 | H | 5.477794  | -0.275743 | -0.250662 |
| 29 | H | 4.753336  | 0.458195  | 1.180881  |
| 30 | H | 4.597400  | -1.278363 | 0.905636  |
| 31 | C | 3.370695  | 1.299830  | -1.058780 |
| 32 | H | 2.506166  | 1.473136  | -1.699815 |
| 33 | H | 3.403217  | 2.106774  | -0.324638 |
| 34 | H | 4.262364  | 1.376373  | -1.681438 |

**Table S7.** XYZ-coordinates and the structure of **3ag'** optimized at PM2 with a 6-31G(d,p) basis set.

| Number | atom | X         | Y         | Z         |
|--------|------|-----------|-----------|-----------|
| 1      | C    | 1.366547  | -0.022164 | 0.408936  |
| 2      | C    | 2.474408  | 0.004330  | -0.642073 |
| 3      | C    | -0.021339 | 0.024985  | -0.224885 |
| 4      | C    | -1.143492 | 0.066599  | 0.817609  |
| 5      | C    | -2.482078 | 0.460840  | 0.184964  |
| 6      | N    | -3.383815 | -0.483222 | -0.167304 |
| 7      | C    | -4.712417 | -0.064191 | -0.597623 |
| 8      | H    | -5.365536 | -0.933466 | -0.569762 |
| 9      | H    | -5.084709 | 0.708426  | 0.069233  |
| 10     | C    | -3.103458 | -1.903162 | -0.373718 |
| 11     | H    | -2.039843 | -2.071040 | -0.439938 |
| 12     | H    | -3.550974 | -2.507612 | 0.416981  |
| 13     | S    | -2.793484 | 2.087774  | 0.001231  |
| 14     | C    | -1.149139 | -1.137112 | 1.769843  |
| 15     | H    | -2.112464 | -1.225145 | 2.271164  |
| 16     | H    | -0.932274 | -2.076186 | 1.268174  |
| 17     | H    | -0.392680 | -0.993566 | 2.540127  |
| 18     | O    | -0.237171 | -1.120359 | -1.063863 |
| 19     | H    | 0.292325  | -0.997633 | -1.860925 |
| 20     | H    | -0.109813 | 0.942006  | -0.820199 |
| 21     | H    | -0.916176 | 0.946384  | 1.420726  |
| 22     | H    | -3.544013 | -2.196233 | -1.326521 |
| 23     | H    | -4.684526 | 0.347530  | -1.607858 |
| 24     | H    | 1.459681  | 0.833003  | 1.083077  |
| 25     | H    | 1.445714  | -0.929261 | 1.009944  |
| 26     | C    | 3.917095  | 0.108521  | -0.117248 |
| 27     | H    | 2.405811  | -0.908656 | -1.243365 |
| 28     | H    | 2.298960  | 0.846888  | -1.322244 |

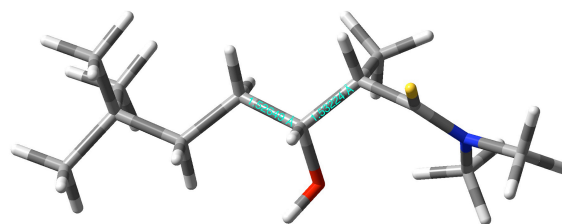



|    |   |          |           |           |
|----|---|----------|-----------|-----------|
| 29 | C | 4.862233 | 0.040214  | -1.318961 |
| 30 | H | 5.902098 | 0.122313  | -0.998841 |
| 31 | H | 4.746363 | -0.905330 | -1.851566 |
| 32 | H | 4.659486 | 0.851924  | -2.019738 |
| 33 | C | 4.136109 | 1.437637  | 0.607391  |
| 34 | H | 3.896485 | 2.279790  | -0.044248 |
| 35 | H | 3.521975 | 1.516467  | 1.504159  |
| 36 | H | 5.179258 | 1.534351  | 0.912573  |
| 37 | C | 4.231033 | -1.050773 | 0.829556  |
| 38 | H | 3.630030 | -1.002093 | 1.737429  |
| 39 | H | 4.040506 | -2.010879 | 0.346054  |
| 40 | H | 5.281116 | -1.025277 | 1.125150  |

**Table S8.** XYZ-coordinates and the structure of **3ah'** optimized at PM2 with a 6-31G(d,p) basis set.

| Number | atom | X         | Y         | Z         |
|--------|------|-----------|-----------|-----------|
| 1      | C    | 0.884852  | 0.013826  | 0.110681  |
| 2      | C    | 1.901251  | 0.023952  | -1.035123 |
| 3      | C    | -0.557332 | 0.039951  | -0.383595 |
| 4      | C    | -1.570666 | 0.100753  | 0.763987  |
| 5      | C    | -2.967792 | 0.471300  | 0.255621  |
| 6      | N    | -3.894666 | -0.485829 | 0.024595  |
| 7      | C    | -5.262867 | -0.084336 | -0.280309 |
| 8      | H    | -5.904530 | -0.953933 | -0.157721 |
| 9      | H    | -5.569268 | 0.708402  | 0.396321  |
| 10     | C    | -3.626154 | -1.909838 | -0.170453 |
| 11     | H    | -2.574564 | -2.072682 | -0.348804 |
| 12     | H    | -3.978023 | -2.493925 | 0.681434  |
| 13     | S    | -3.304724 | 2.090821  | 0.052907  |
| 14     | C    | -1.470682 | -1.079660 | 1.739643  |
| 15     | H    | -2.376753 | -1.158711 | 2.339464  |
| 16     | H    | -1.301197 | -2.030097 | 1.241119  |
| 17     | H    | -0.639691 | -0.914574 | 2.423862  |
| 18     | O    | -0.839165 | -1.128522 | -1.171706 |
| 19     | H    | -0.477141 | -0.978738 | -2.053004 |
| 20     | H    | -0.712084 | 0.941272  | -0.988696 |
| 21     | H    | -1.292312 | 0.996111  | 1.321123  |
| 22     | H    | -4.166537 | -2.233065 | -1.059983 |
| 23     | H    | -5.341326 | 0.294519  | -1.300718 |
| 24     | H    | 1.058388  | 0.882678  | 0.752057  |
| 25     | H    | 1.046258  | -0.880278 | 0.716524  |
| 26     | H    | 1.757893  | -0.868414 | -1.649307 |
| 27     | H    | 1.721311  | 0.894320  | -1.673764 |
| 28     | C    | 3.316237  | 0.053824  | -0.522494 |
| 29     | C    | 3.956657  | 1.272378  | -0.264603 |
| 30     | C    | 3.991268  | -1.136612 | -0.224529 |
| 31     | C    | 5.247226  | 1.301994  | 0.264940  |
| 32     | H    | 3.444822  | 2.201009  | -0.492939 |
| 33     | C    | 5.281598  | -1.111850 | 0.305870  |

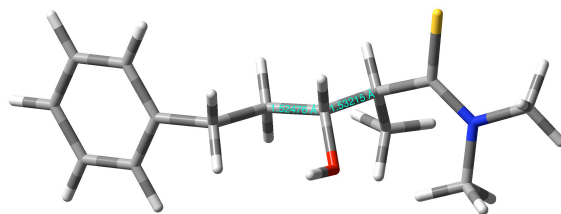

|    |   |          |           |           |
|----|---|----------|-----------|-----------|
| 34 | H | 3.506225 | -2.086594 | -0.421796 |
| 35 | C | 5.911634 | 0.108856  | 0.555291  |
| 36 | H | 5.731855 | 2.252199  | 0.451627  |
| 37 | H | 5.793104 | -2.040992 | 0.524395  |
| 38 | H | 6.913761 | 0.130103  | 0.964208  |

**Table S9.** XYZ-coordinates and the structure of **3ca'** optimized at PM2 with a 6-31G(d,p) basis set.

| Number | atom | X         | Y         | Z         |
|--------|------|-----------|-----------|-----------|
| 1      | C    | 2.597478  | -0.355521 | -0.317029 |
| 2      | C    | 3.573187  | -0.656441 | 0.819081  |
| 3      | H    | 3.593387  | 0.167971  | 1.533063  |
| 4      | H    | 3.296165  | -1.569281 | 1.349176  |
| 5      | H    | 4.585632  | -0.784645 | 0.437782  |
| 6      | C    | 2.973577  | 0.946740  | -1.018085 |
| 7      | H    | 2.399206  | 1.100020  | -1.930764 |
| 8      | H    | 2.794673  | 1.790463  | -0.352107 |
| 9      | H    | 4.029085  | 0.943384  | -1.290421 |
| 10     | C    | 1.160257  | -0.340201 | 0.215530  |
| 11     | C    | 0.111199  | -0.087476 | -0.860717 |
| 12     | C    | -1.288147 | -0.331018 | -0.332940 |
| 13     | N    | -2.033743 | 0.747679  | -0.012472 |
| 14     | C    | -3.409547 | 0.540579  | 0.424609  |
| 15     | H    | -3.900217 | 1.506610  | 0.496639  |
| 16     | H    | -3.931880 | -0.092630 | -0.289950 |
| 17     | C    | -1.529632 | 2.121553  | -0.060856 |
| 18     | H    | -0.514303 | 2.160015  | 0.315836  |
| 19     | H    | -1.575685 | 2.528440  | -1.073332 |
| 20     | S    | -1.836012 | -1.892237 | -0.165507 |
| 21     | O    | 0.980943  | 0.688865  | 1.203632  |
| 22     | H    | 1.341973  | 0.360259  | 2.035510  |
| 23     | H    | 0.941089  | -1.319347 | 0.656525  |
| 24     | H    | 0.275173  | -0.796289 | -1.671727 |
| 25     | H    | -2.154552 | 2.732649  | 0.584164  |
| 26     | H    | -3.431507 | 0.036258  | 1.390833  |
| 27     | H    | 2.650830  | -1.178396 | -1.038266 |
| 28     | H    | 0.235553  | 0.916352  | -1.264167 |

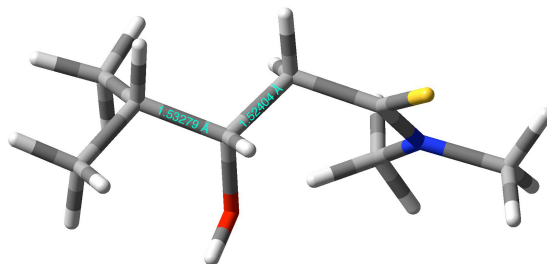

## 6. NMR Spectra of New Compounds

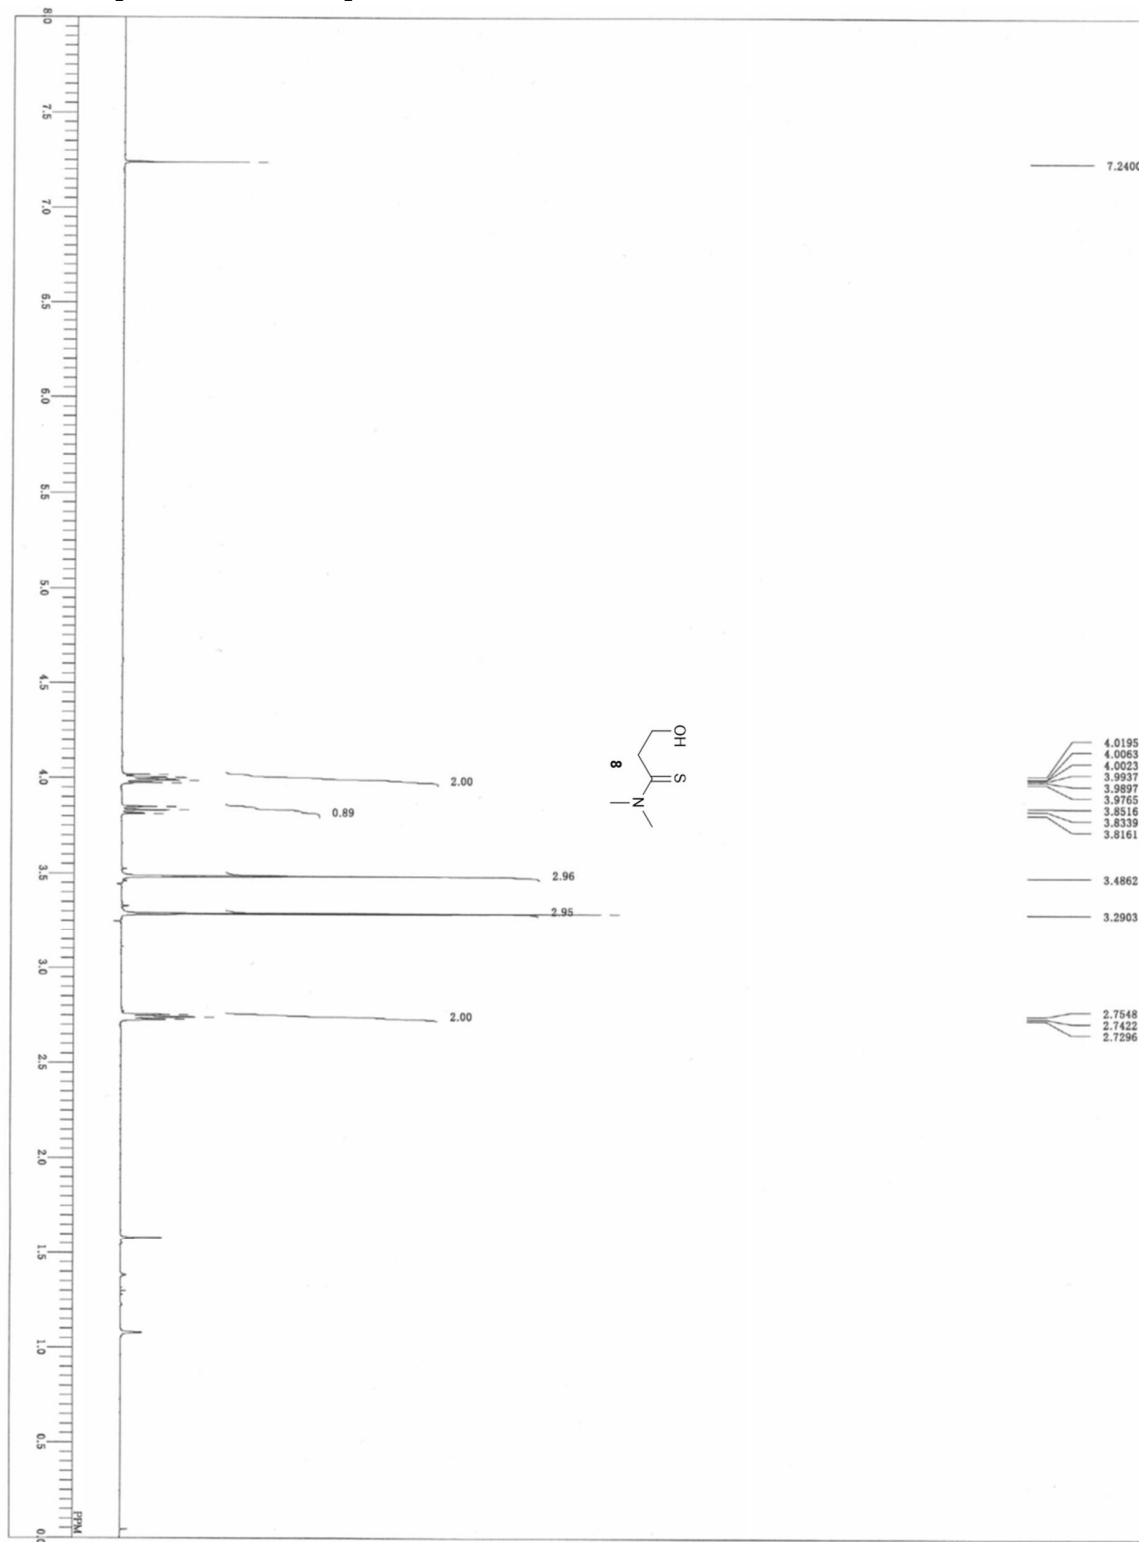

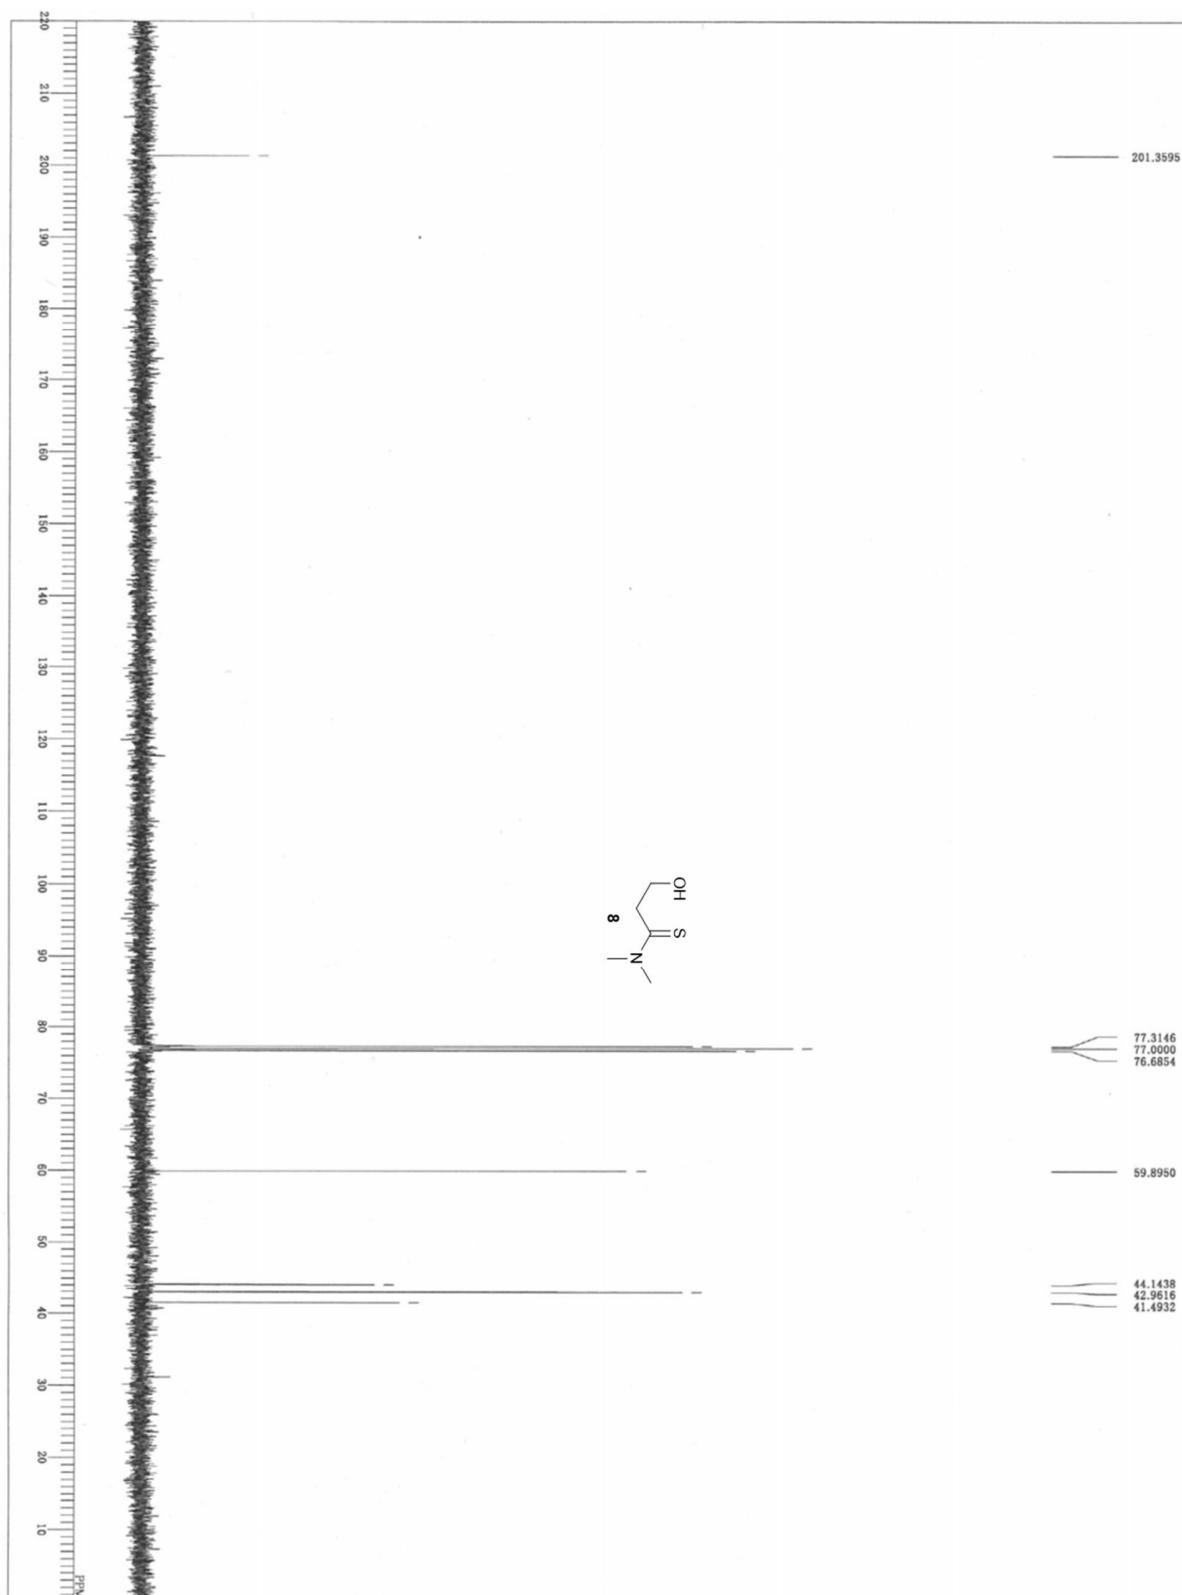

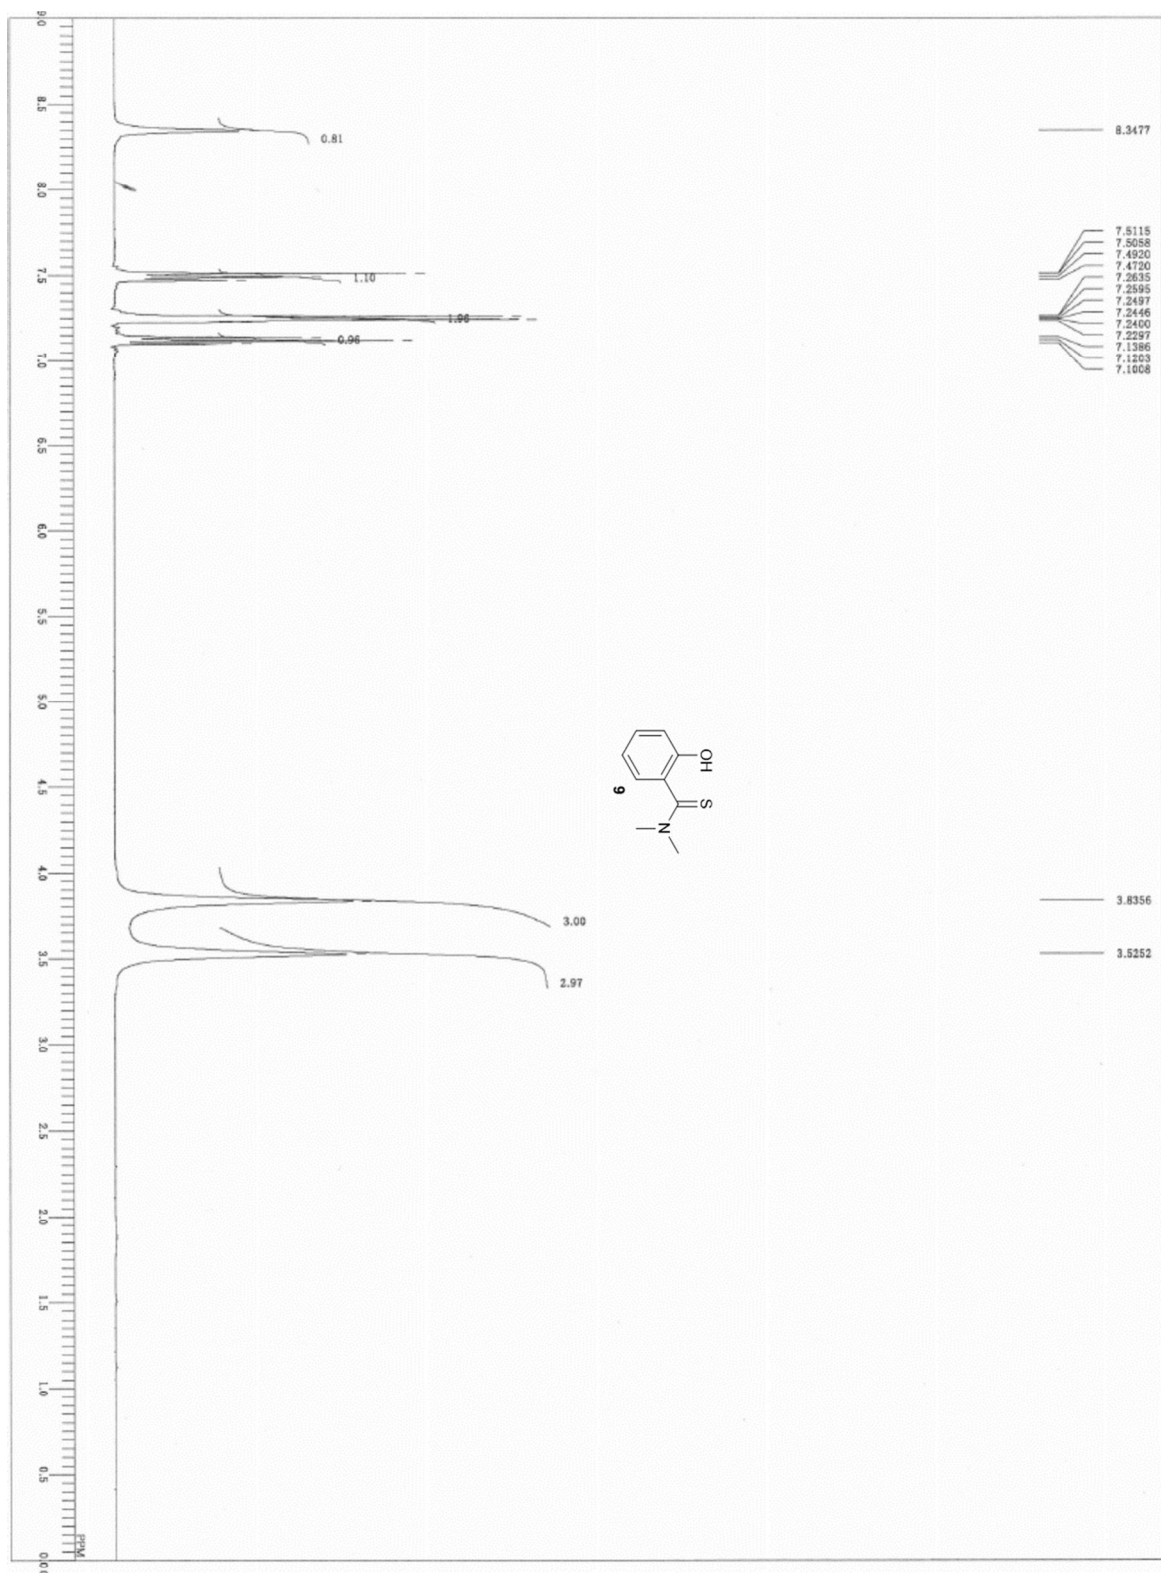

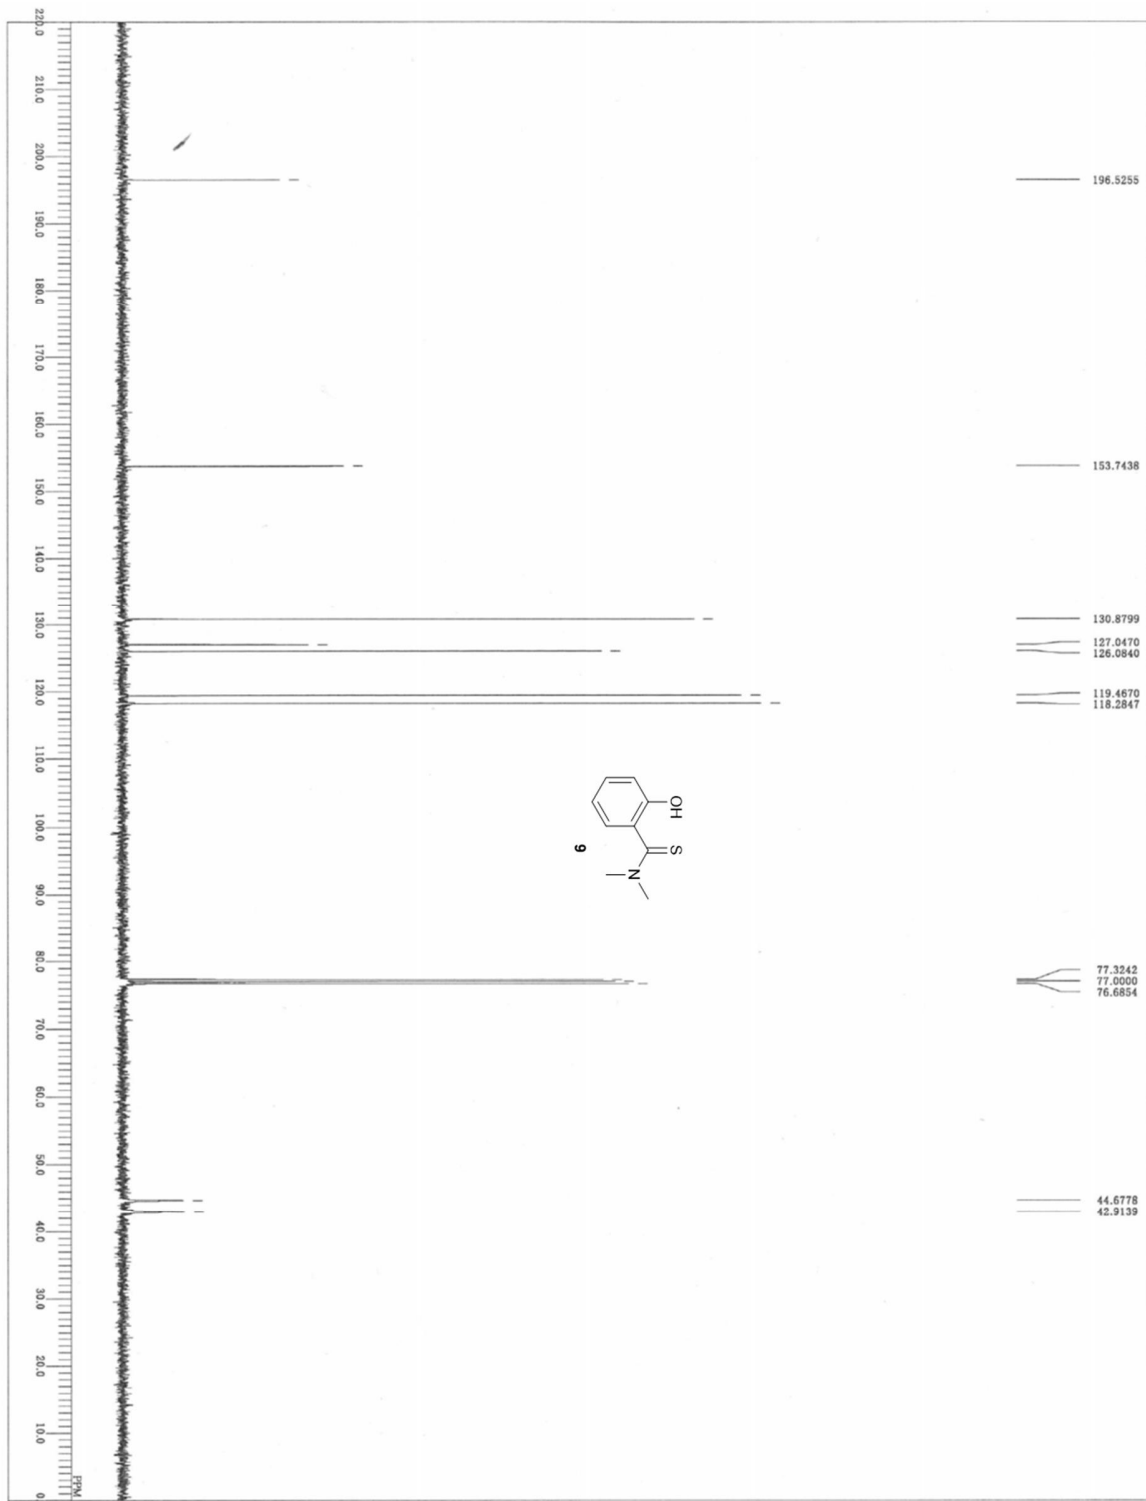

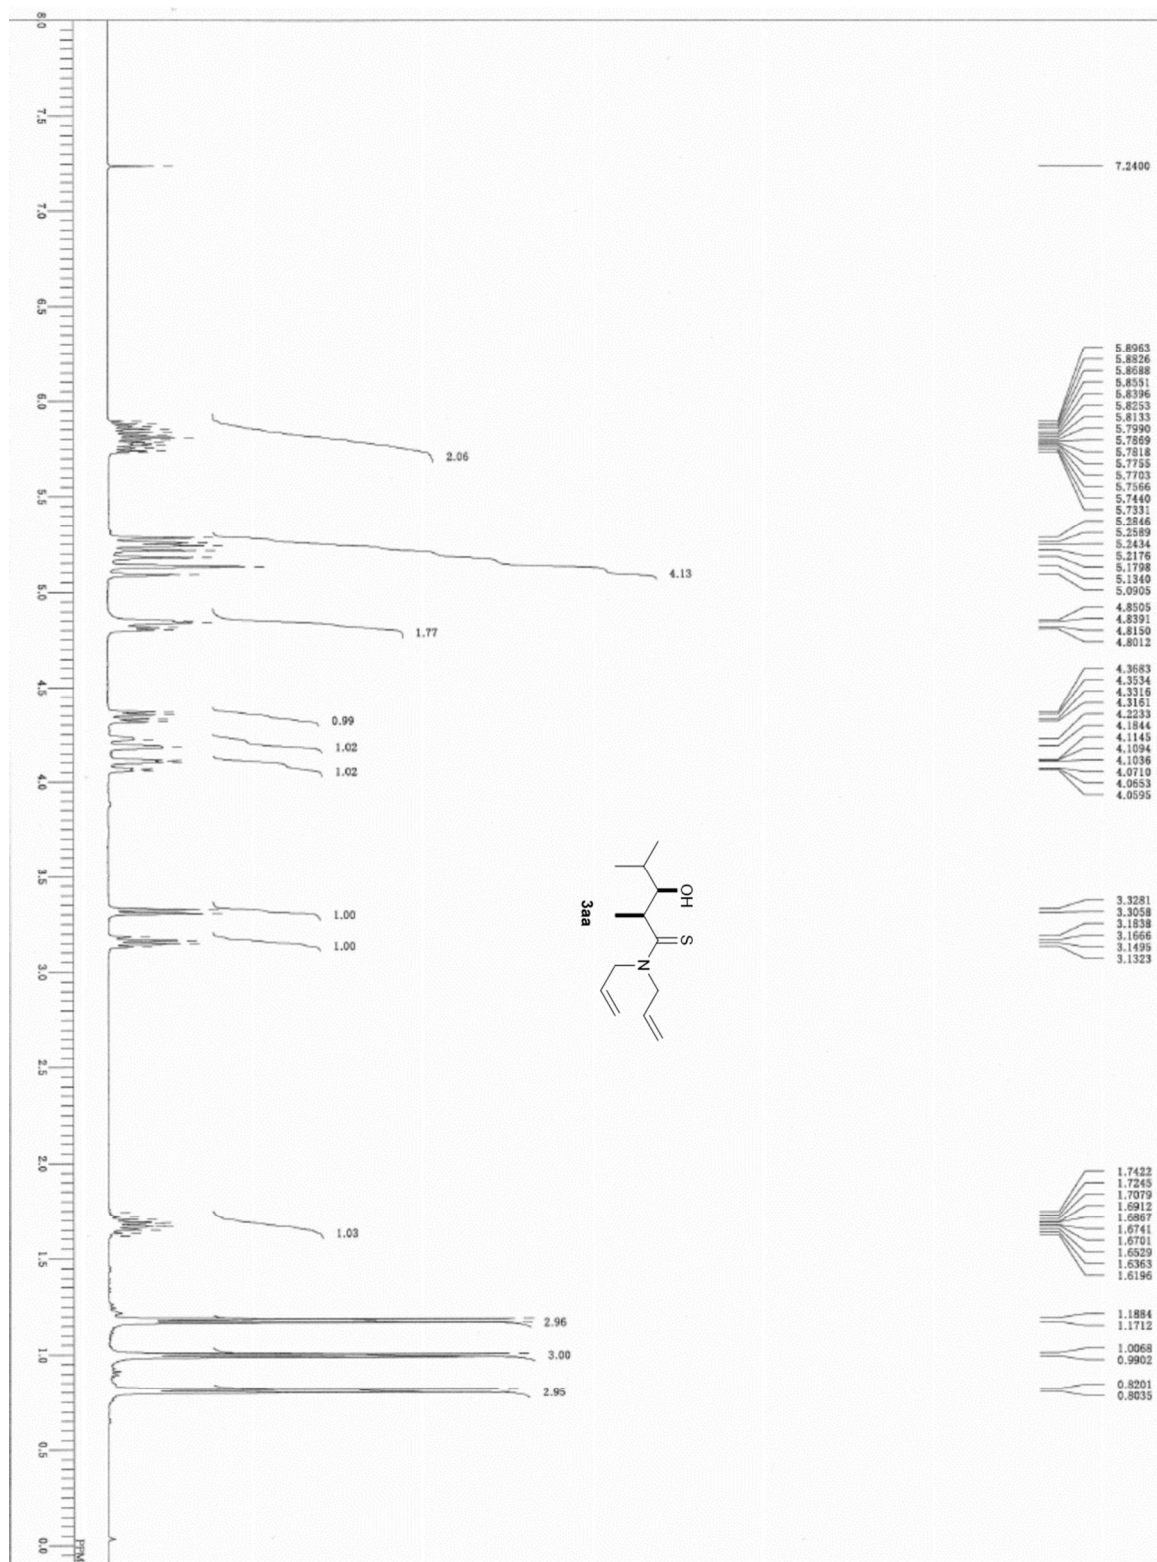

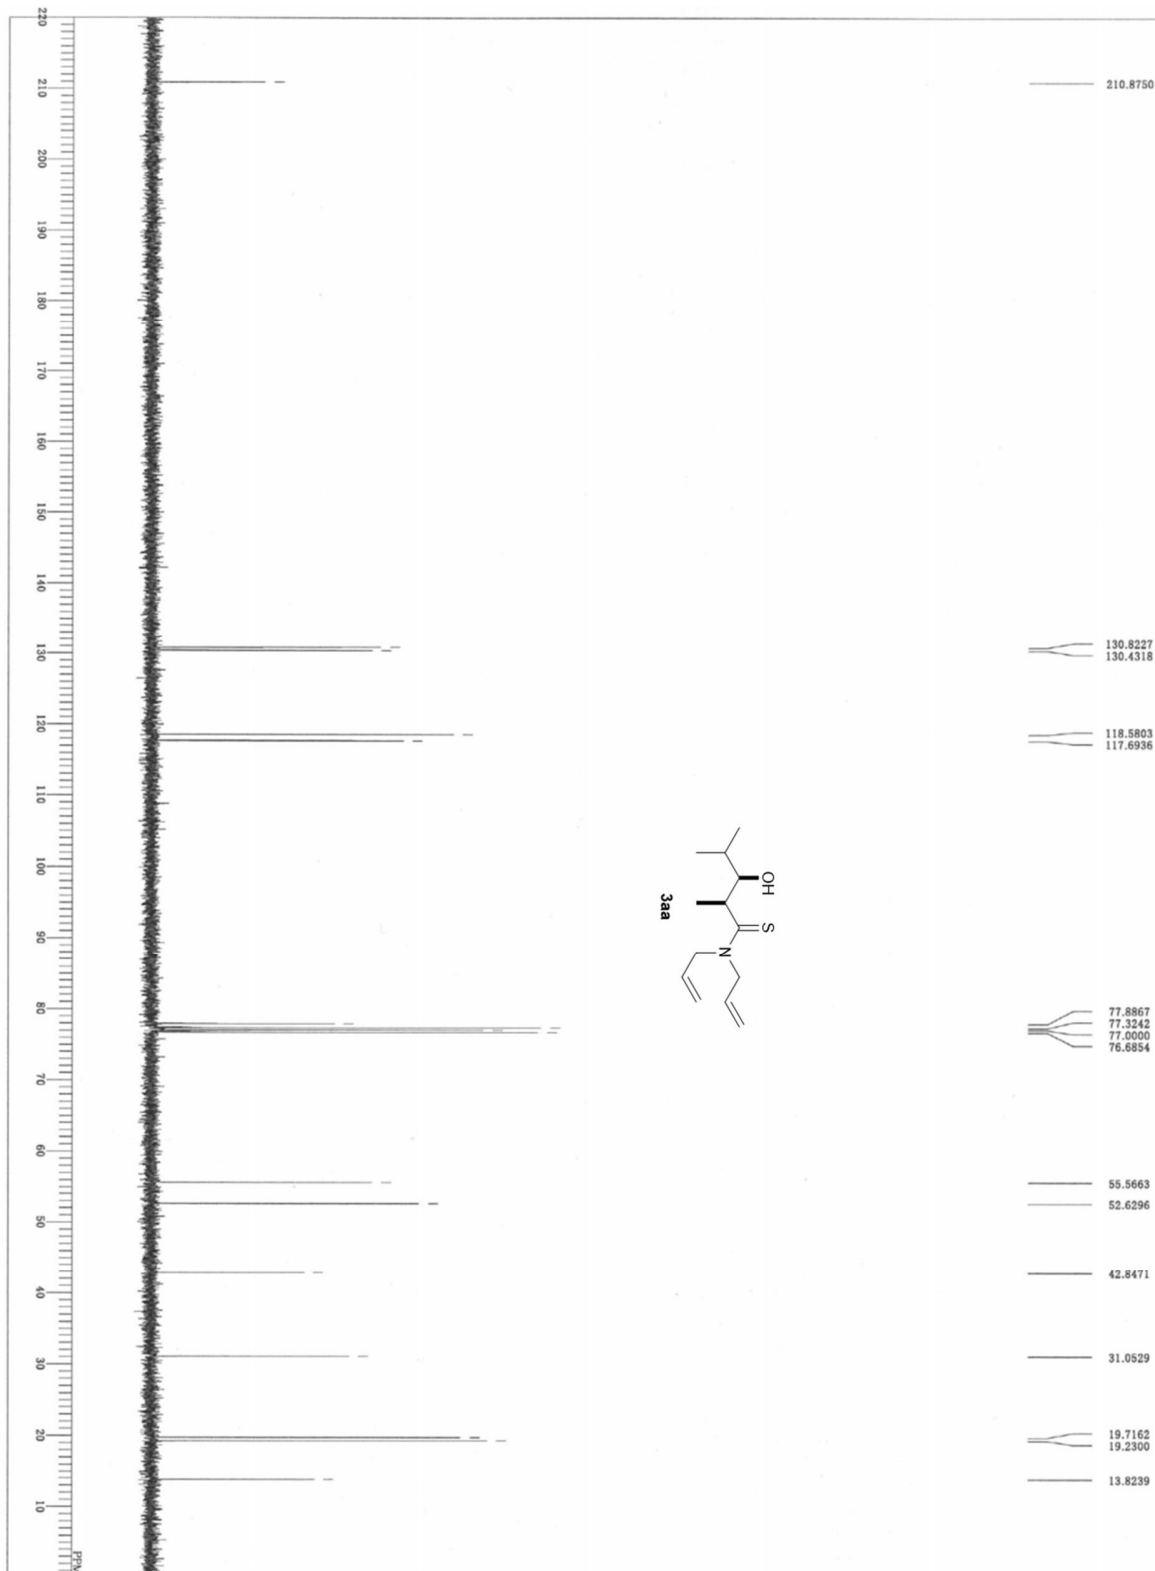



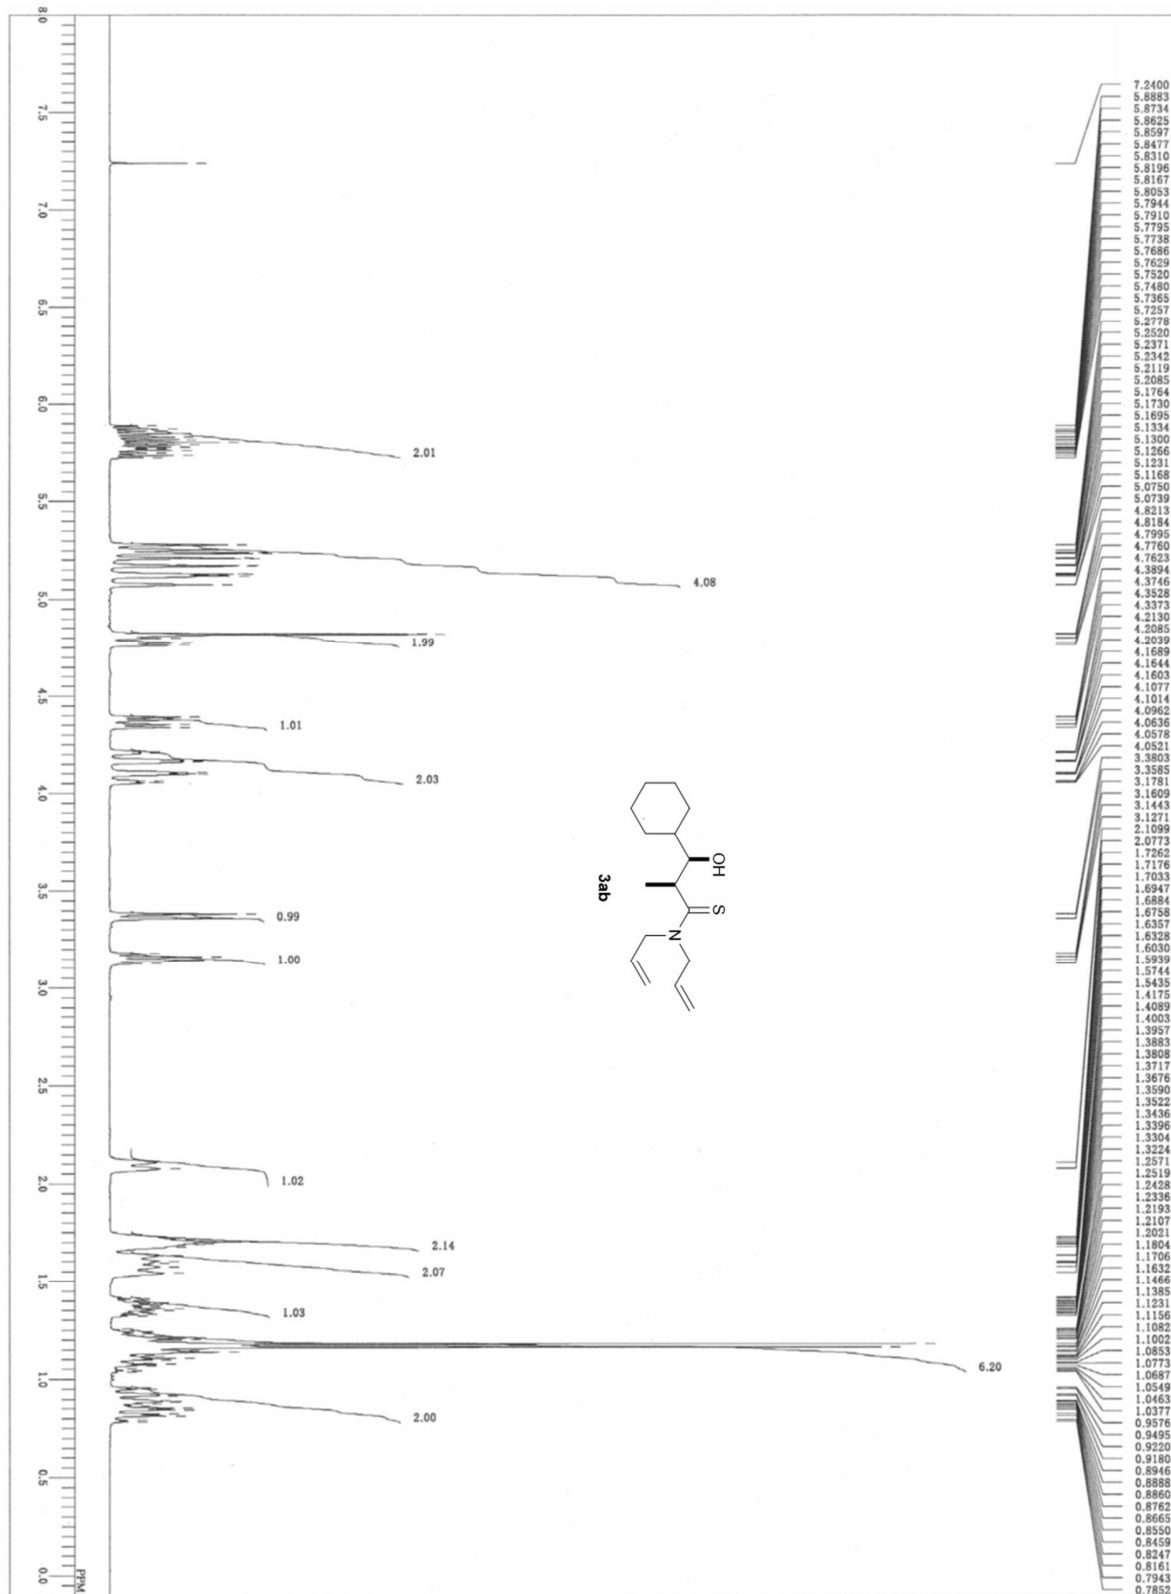

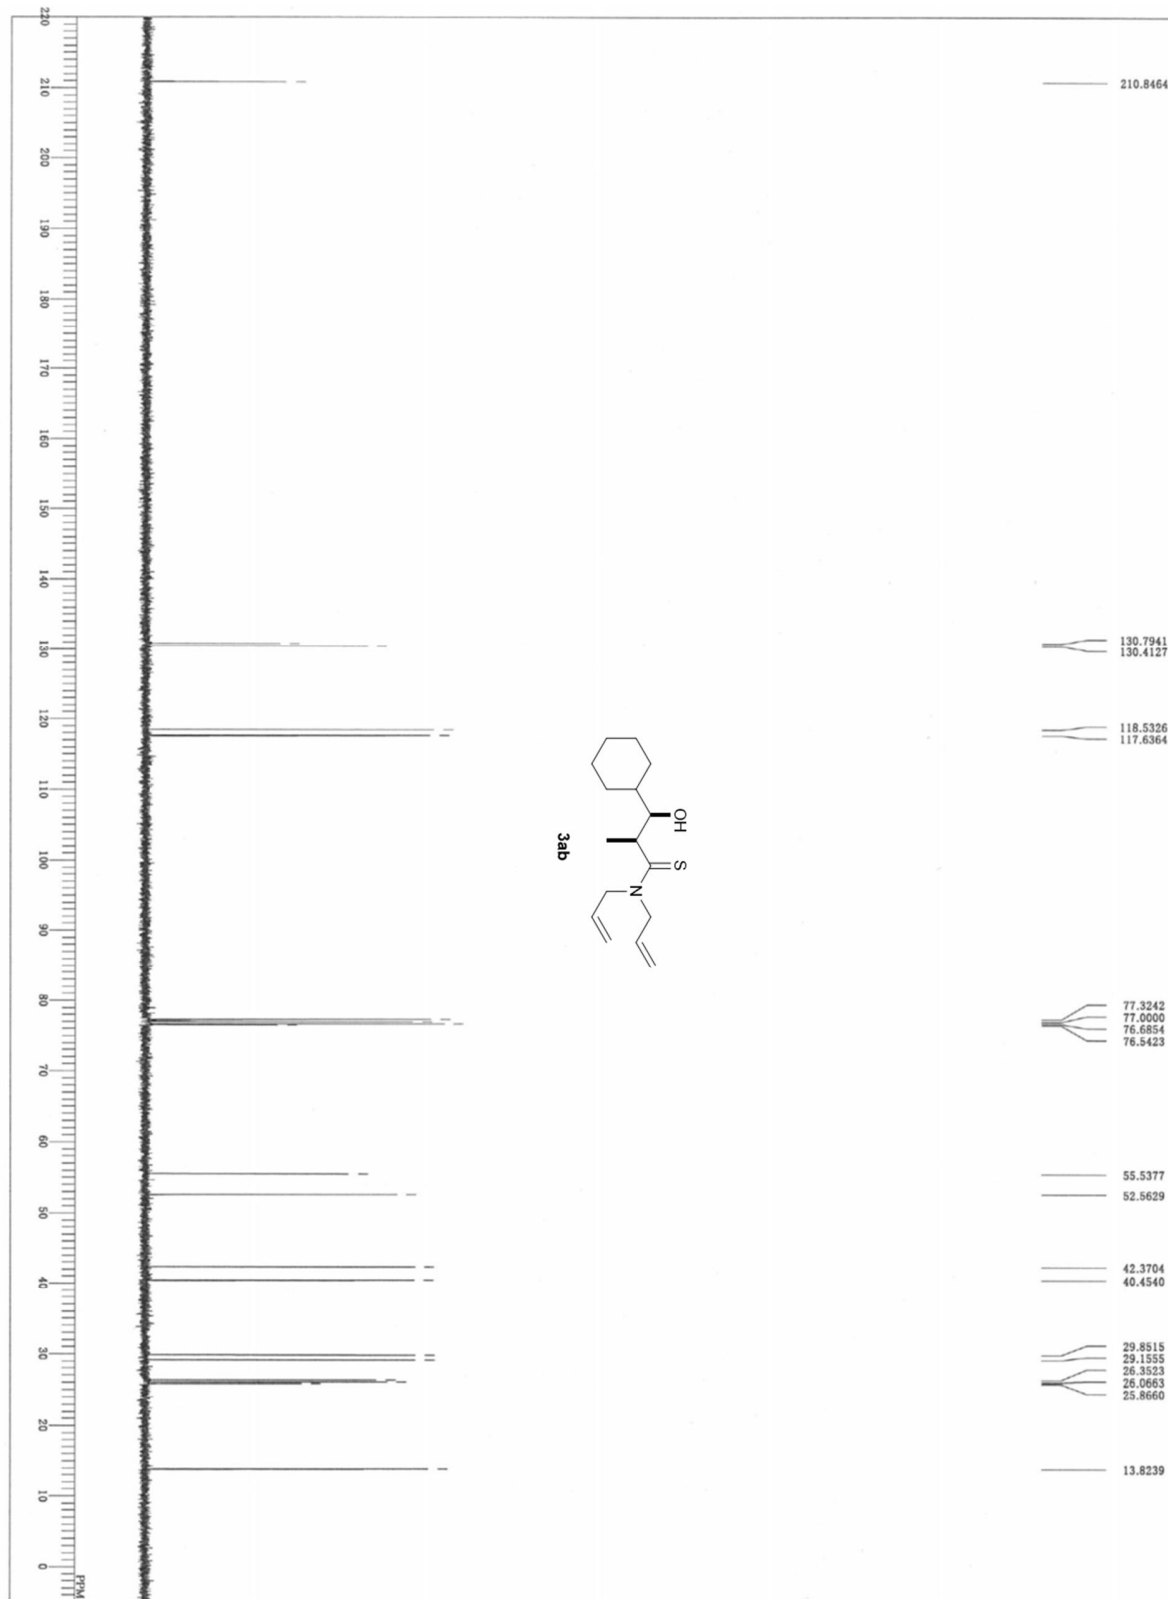

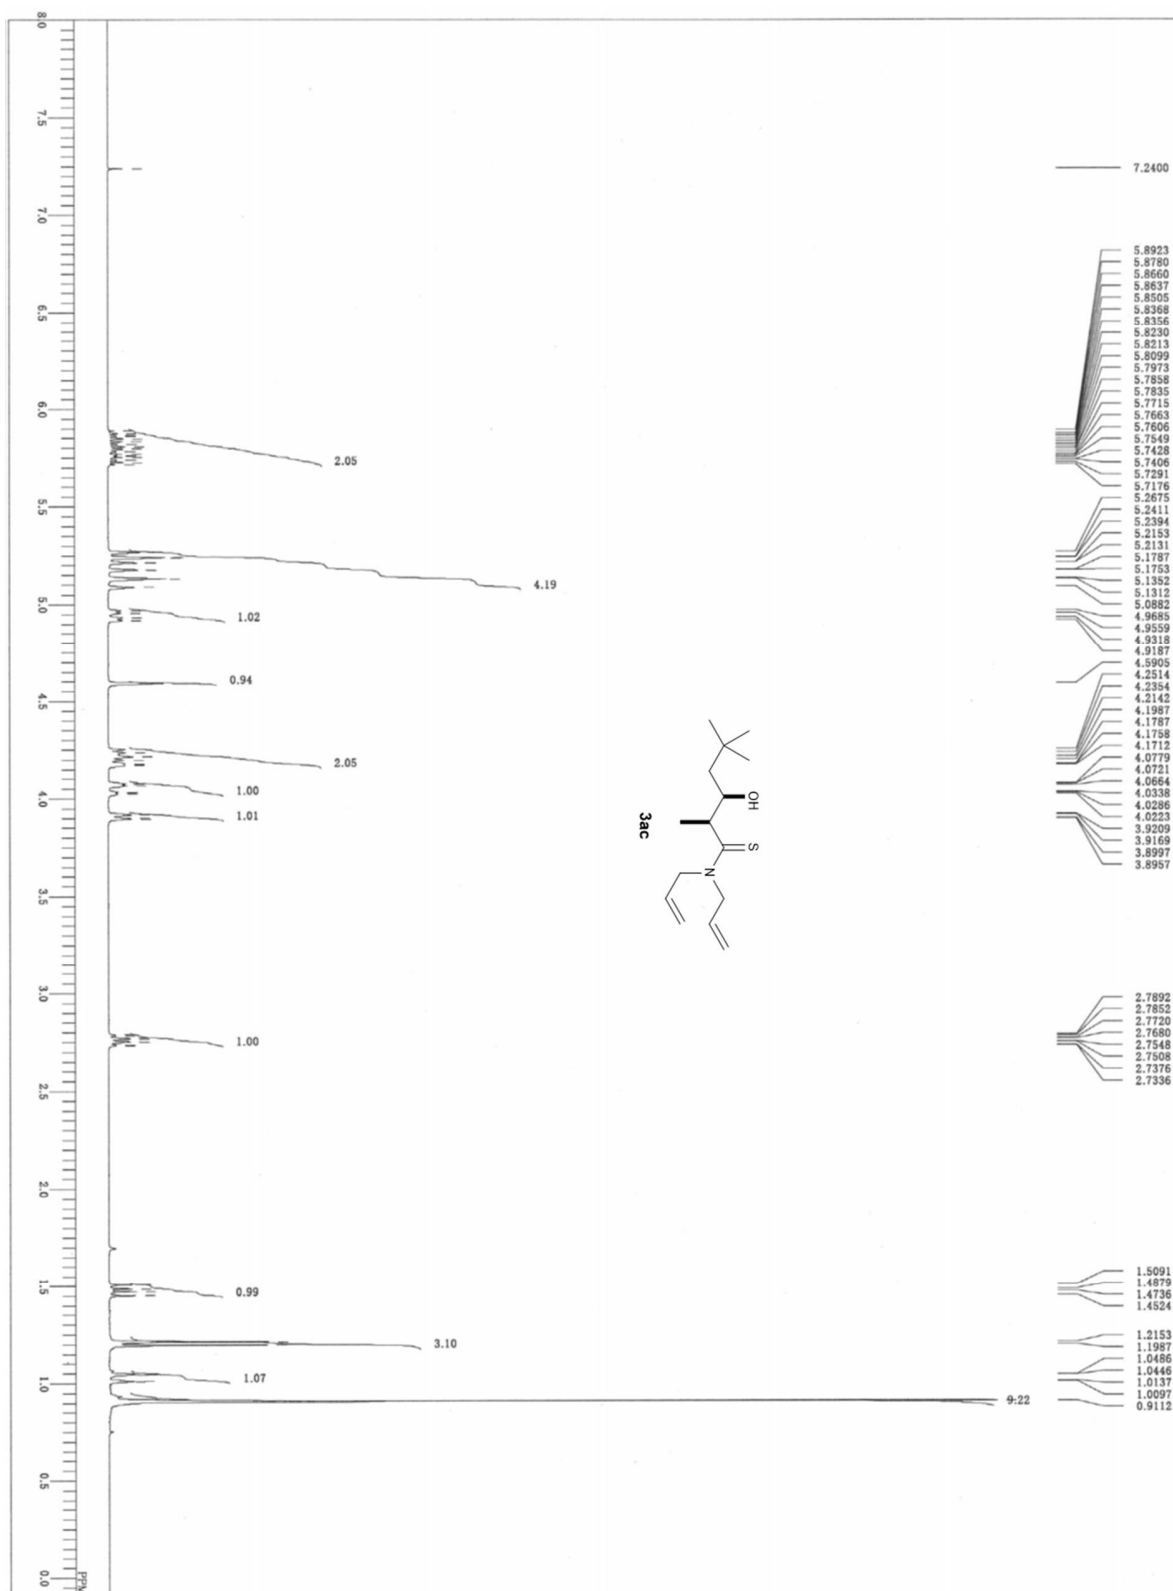

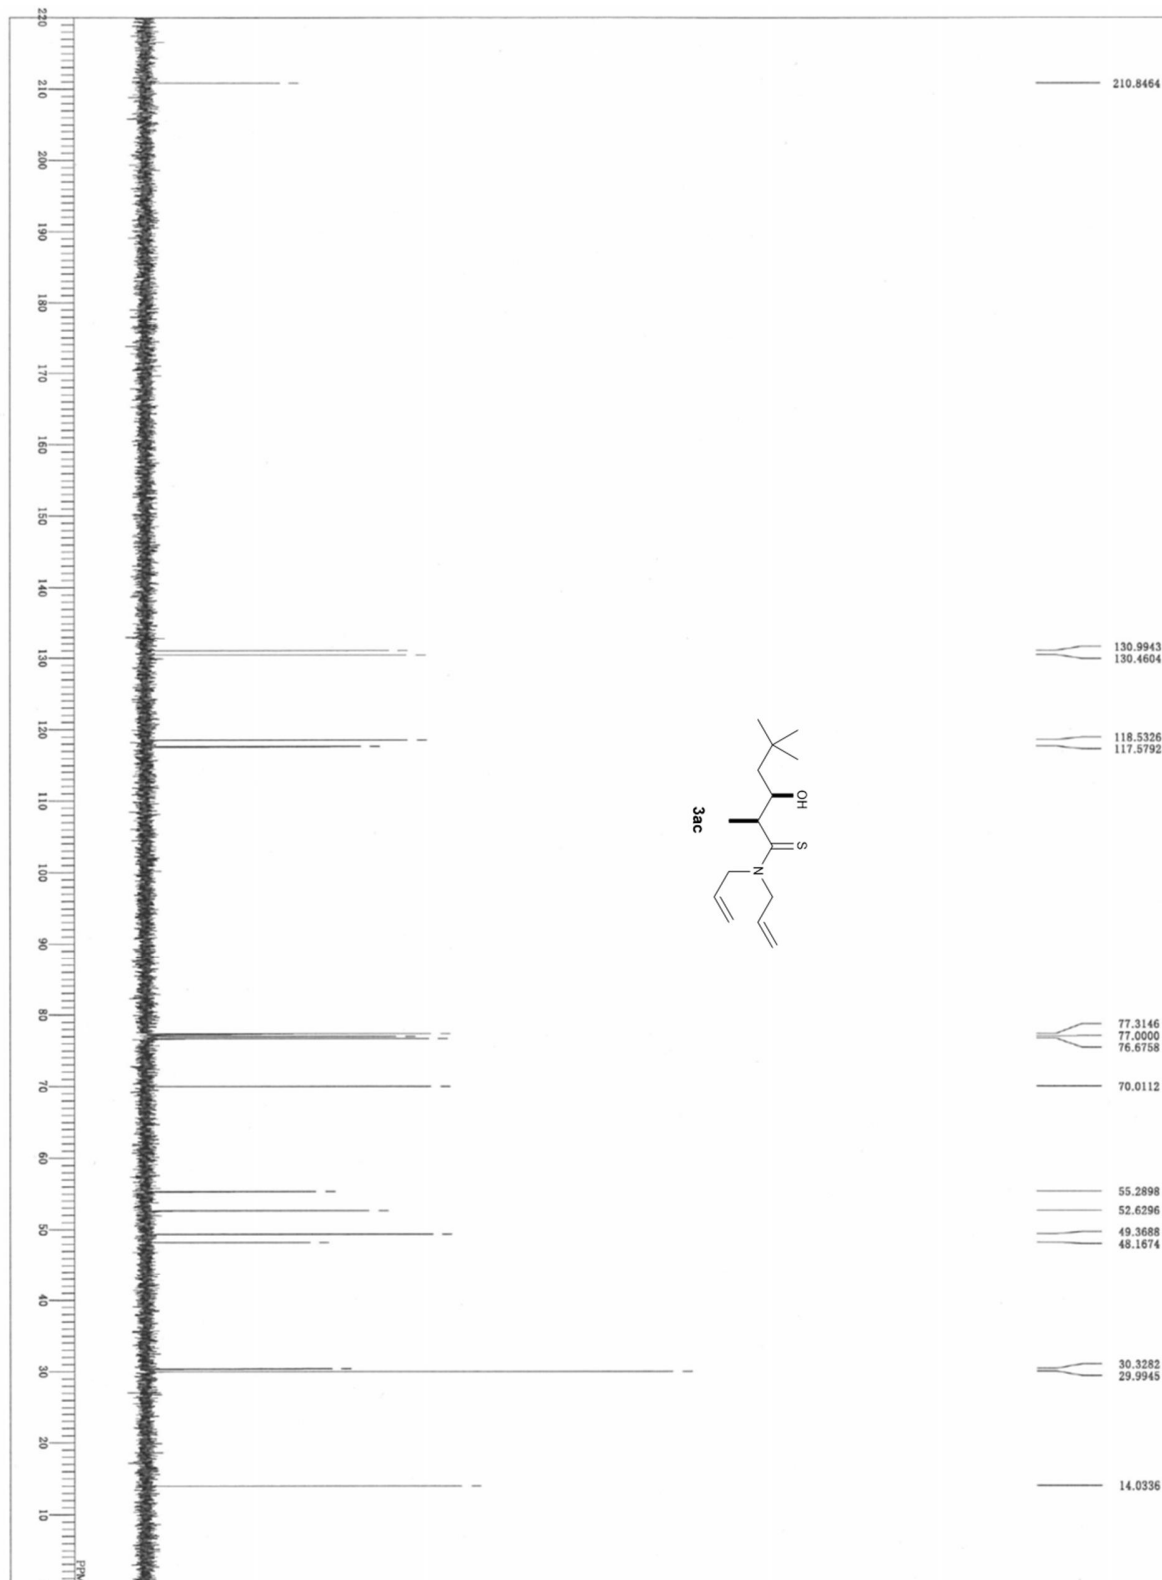

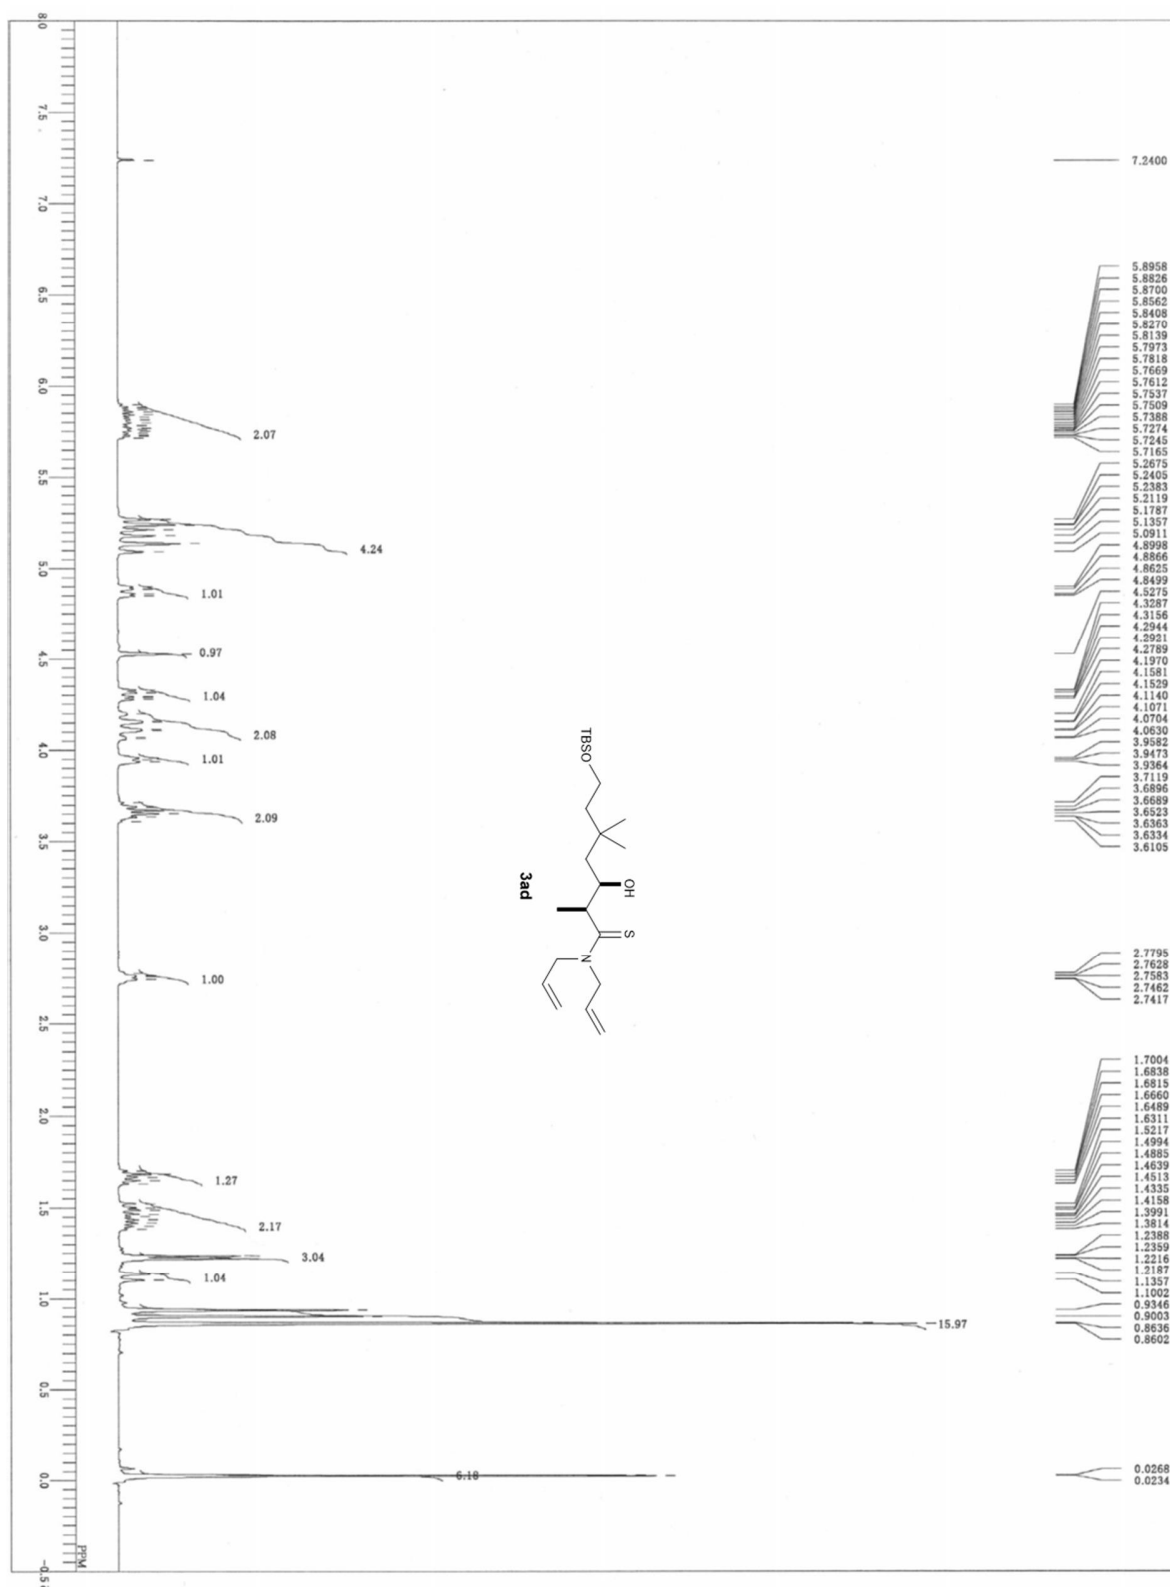

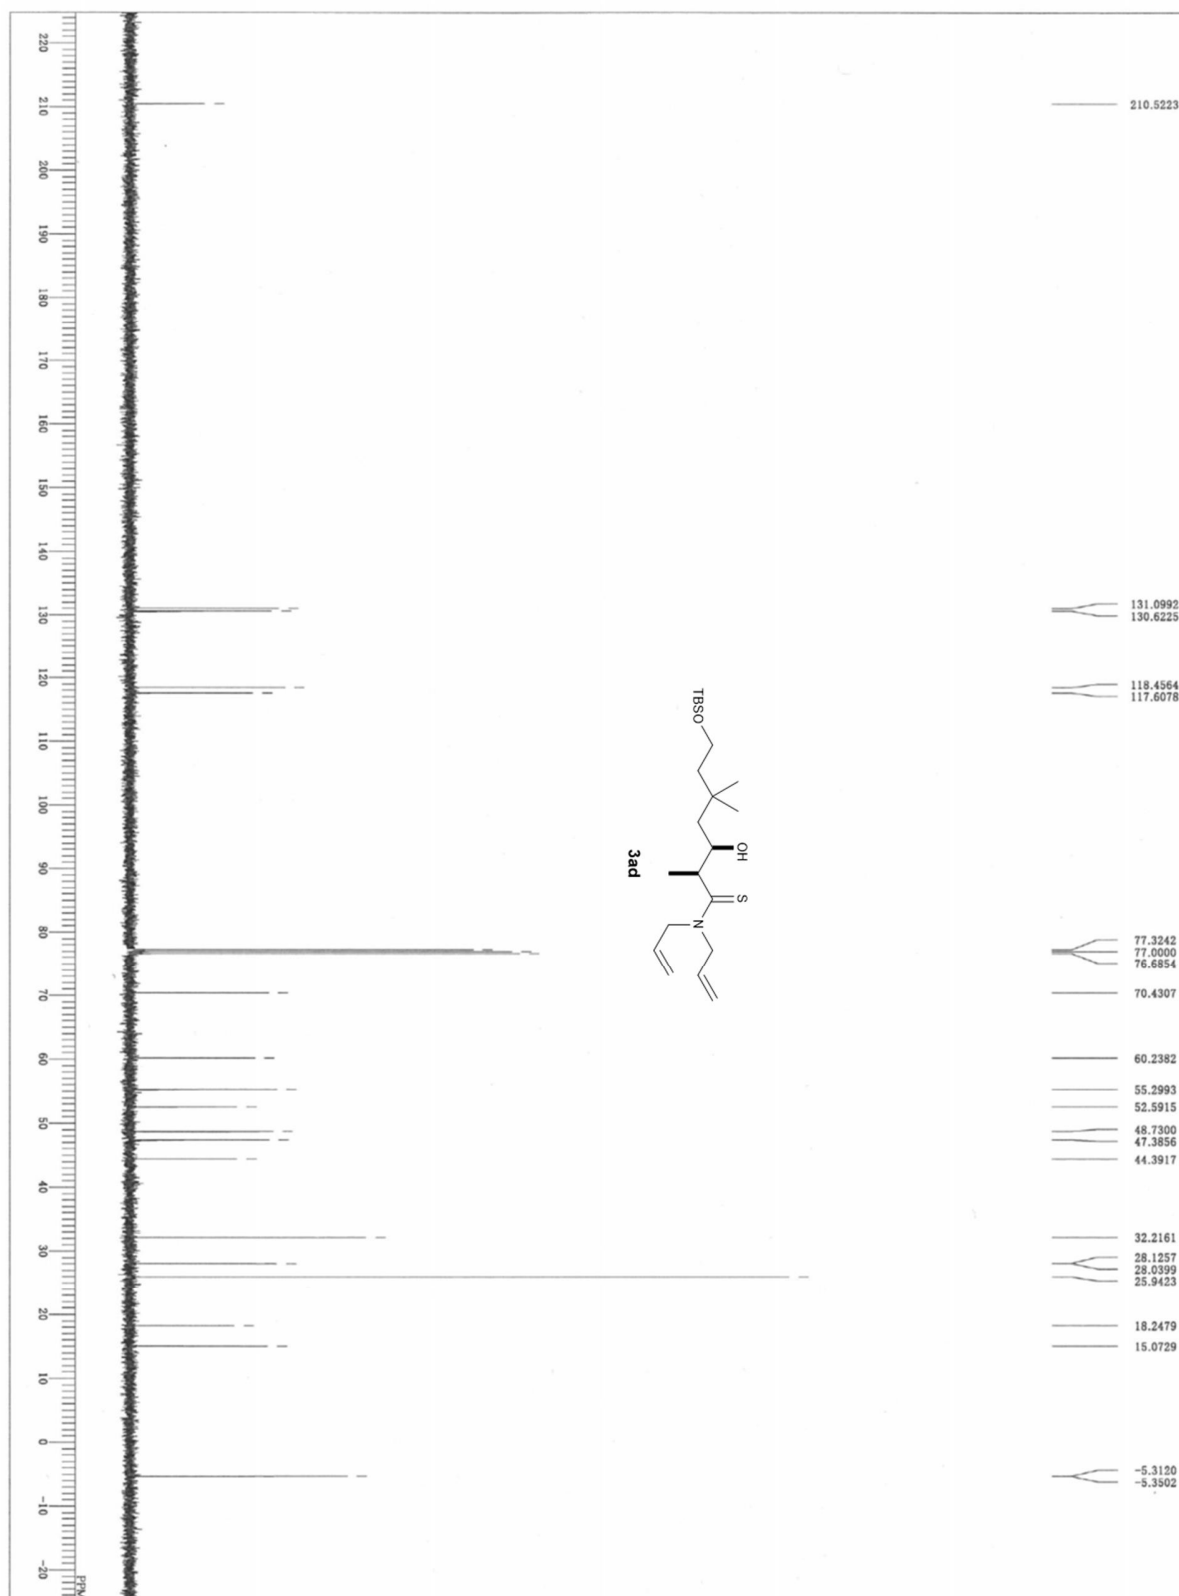

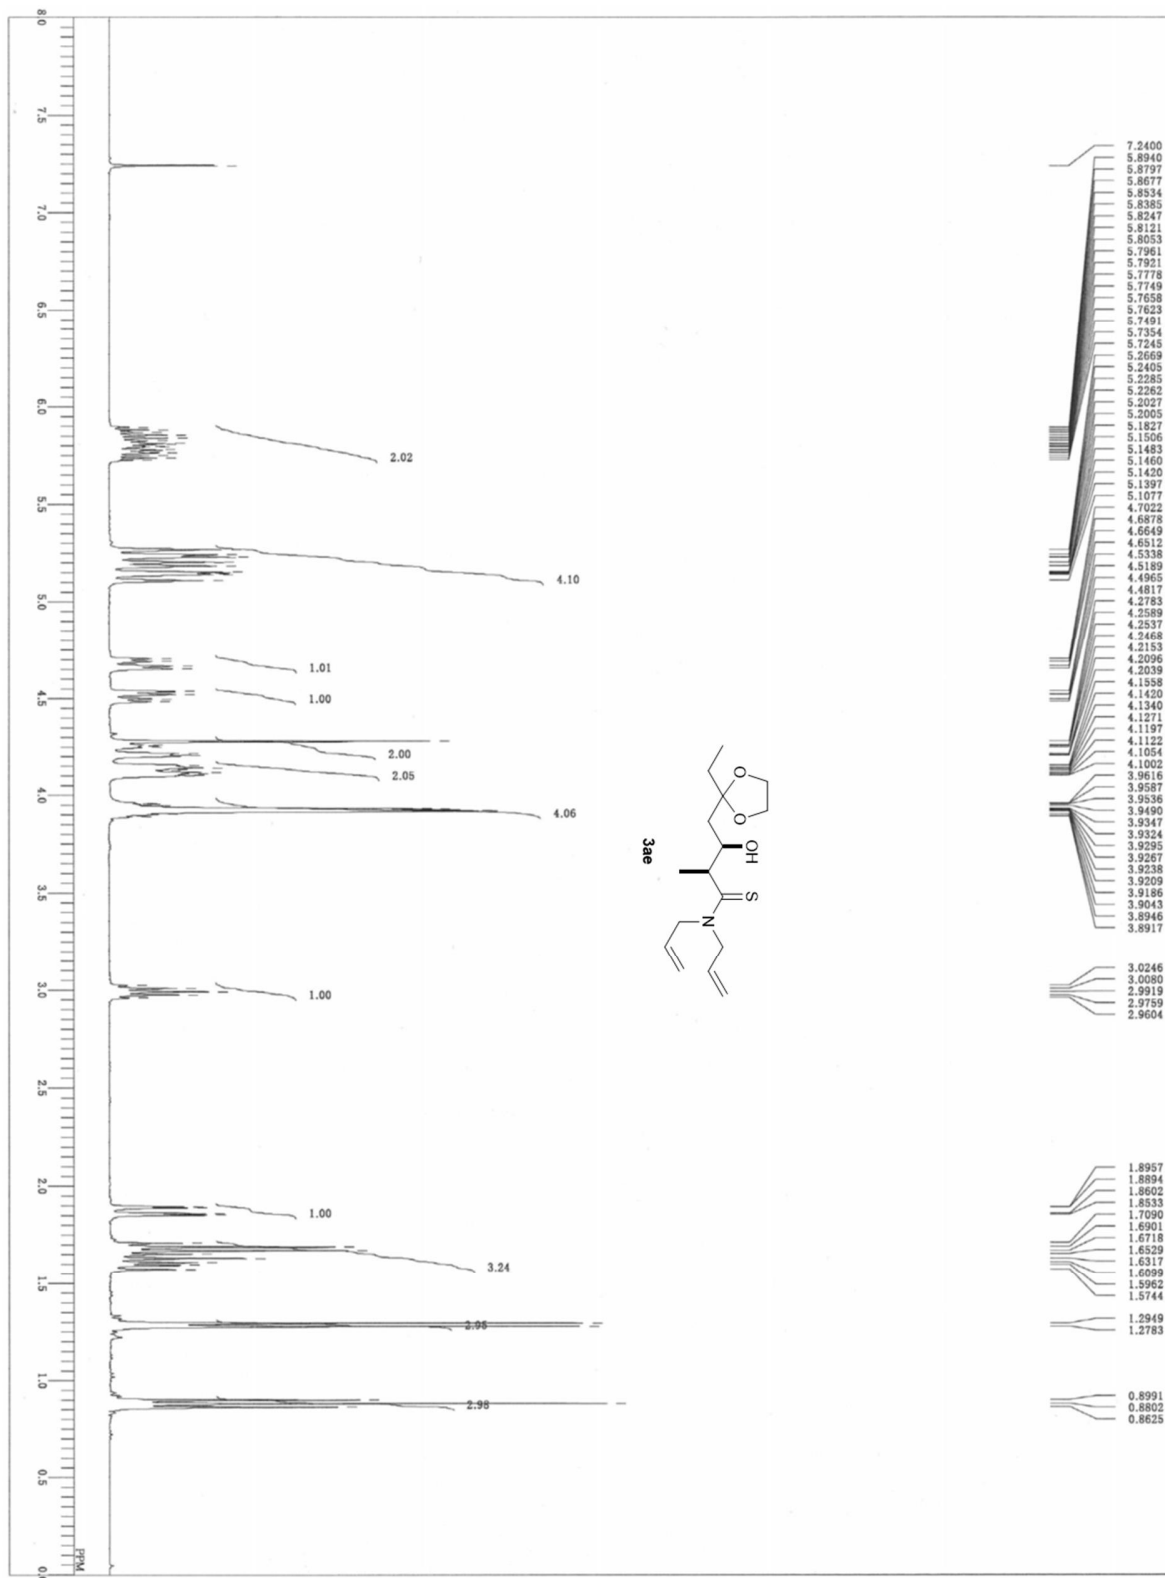

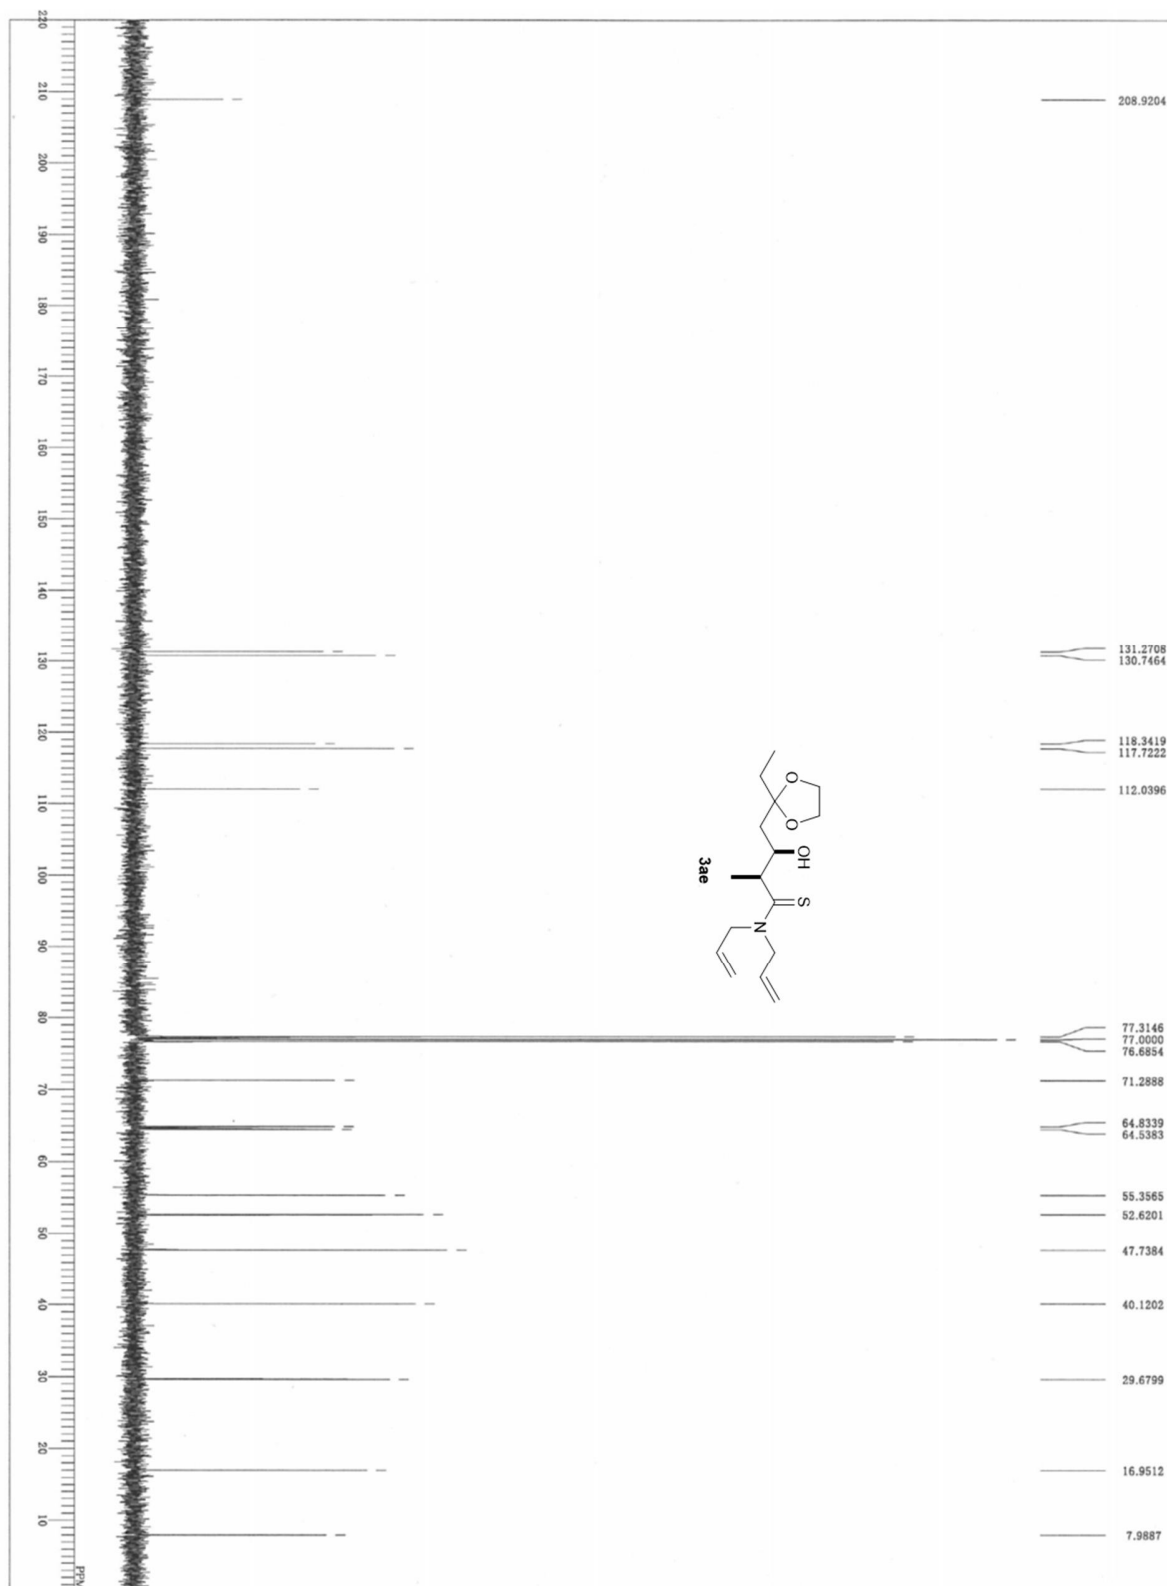



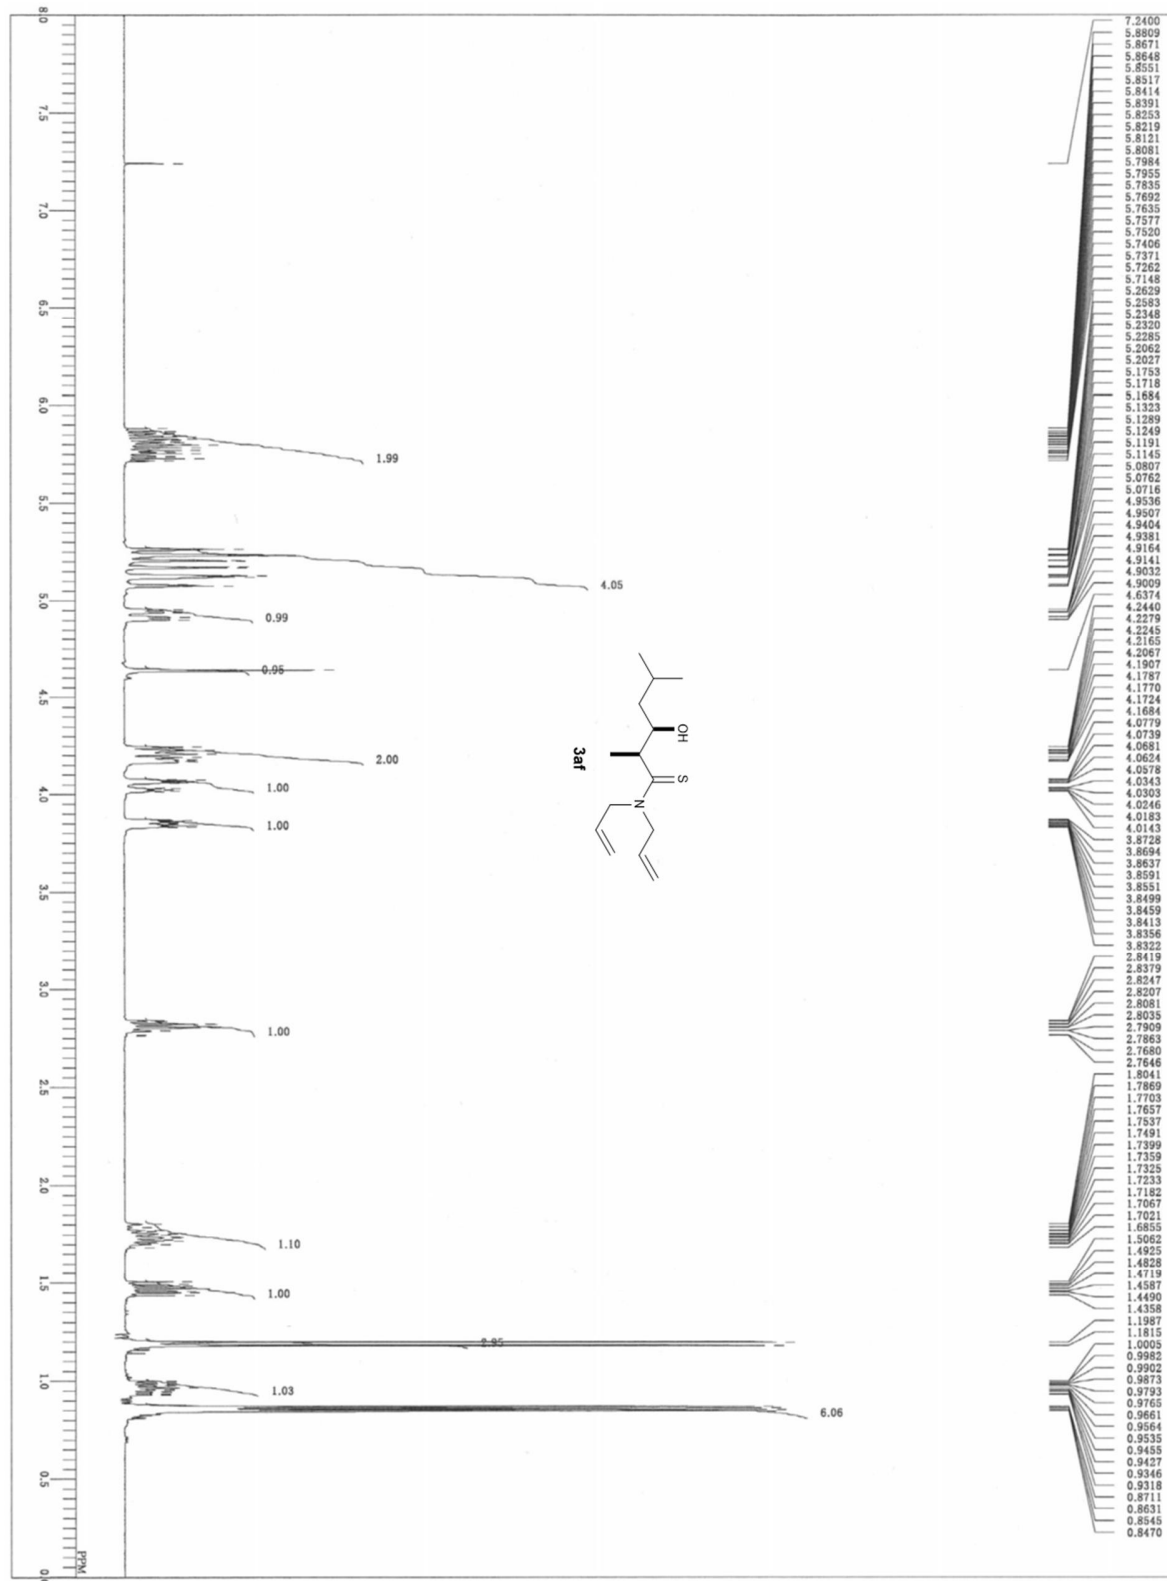

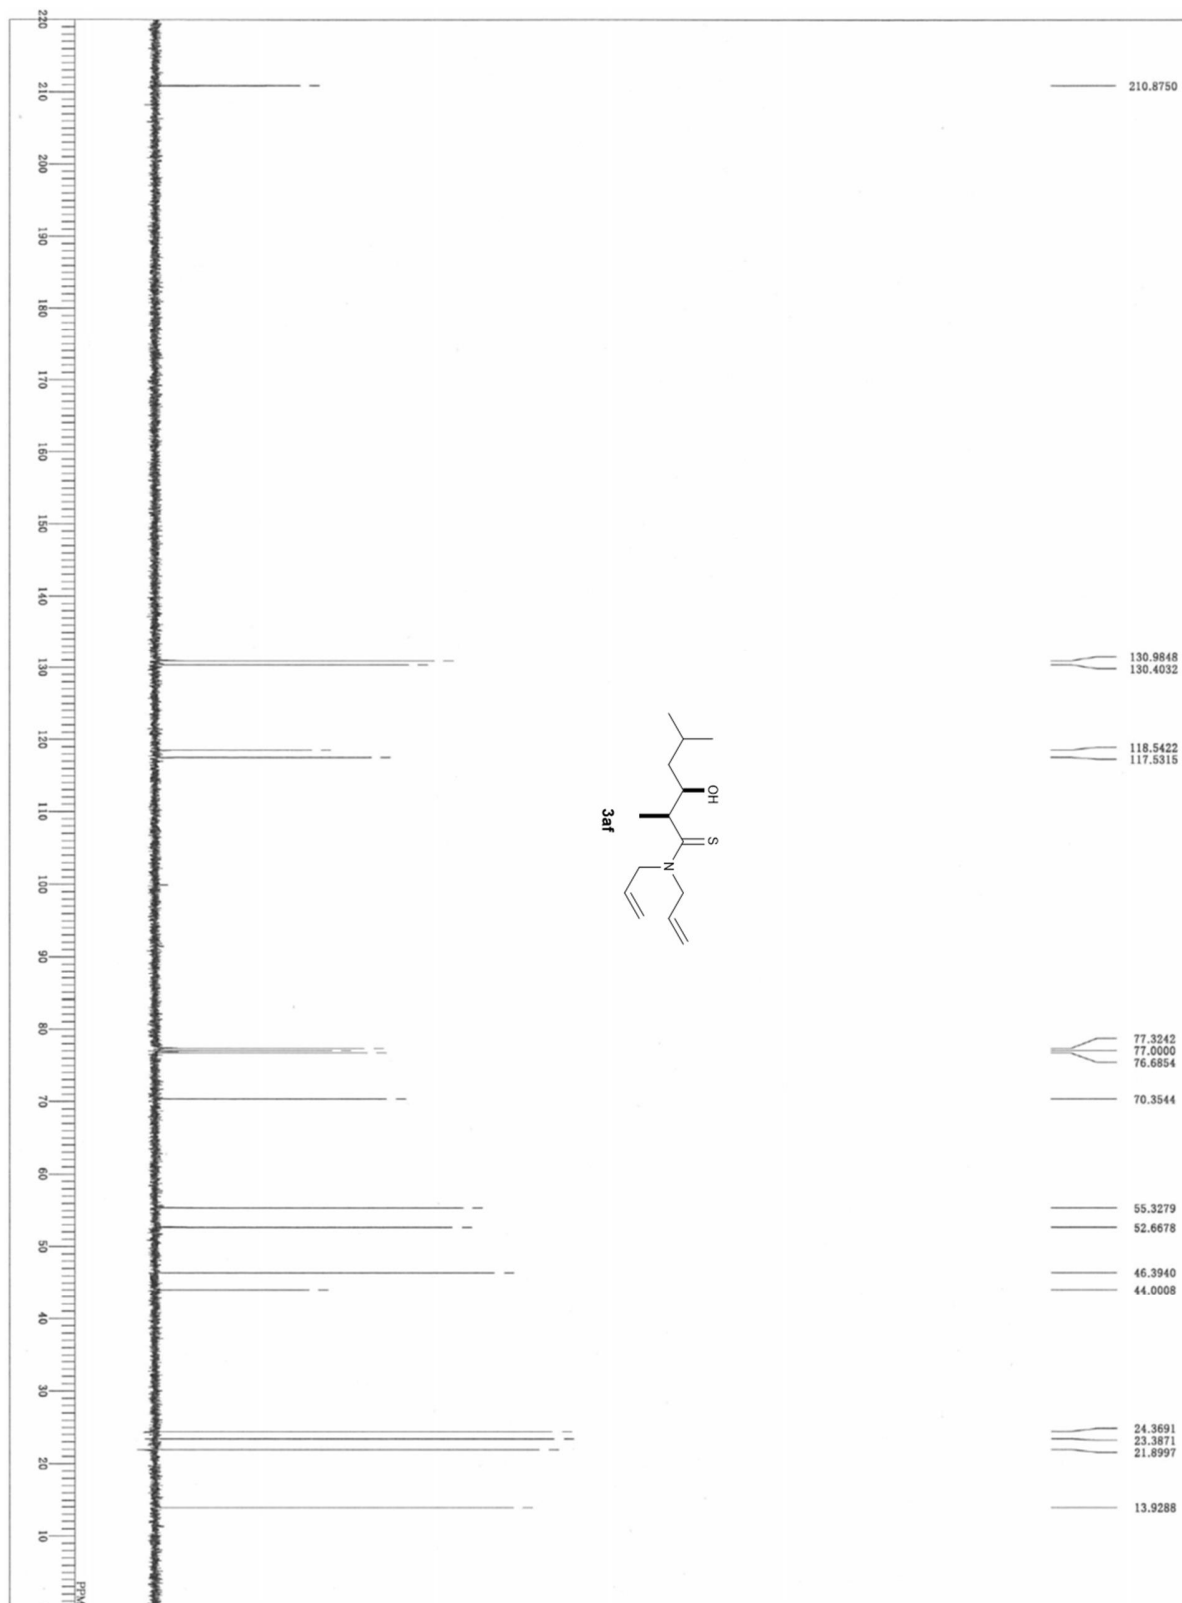

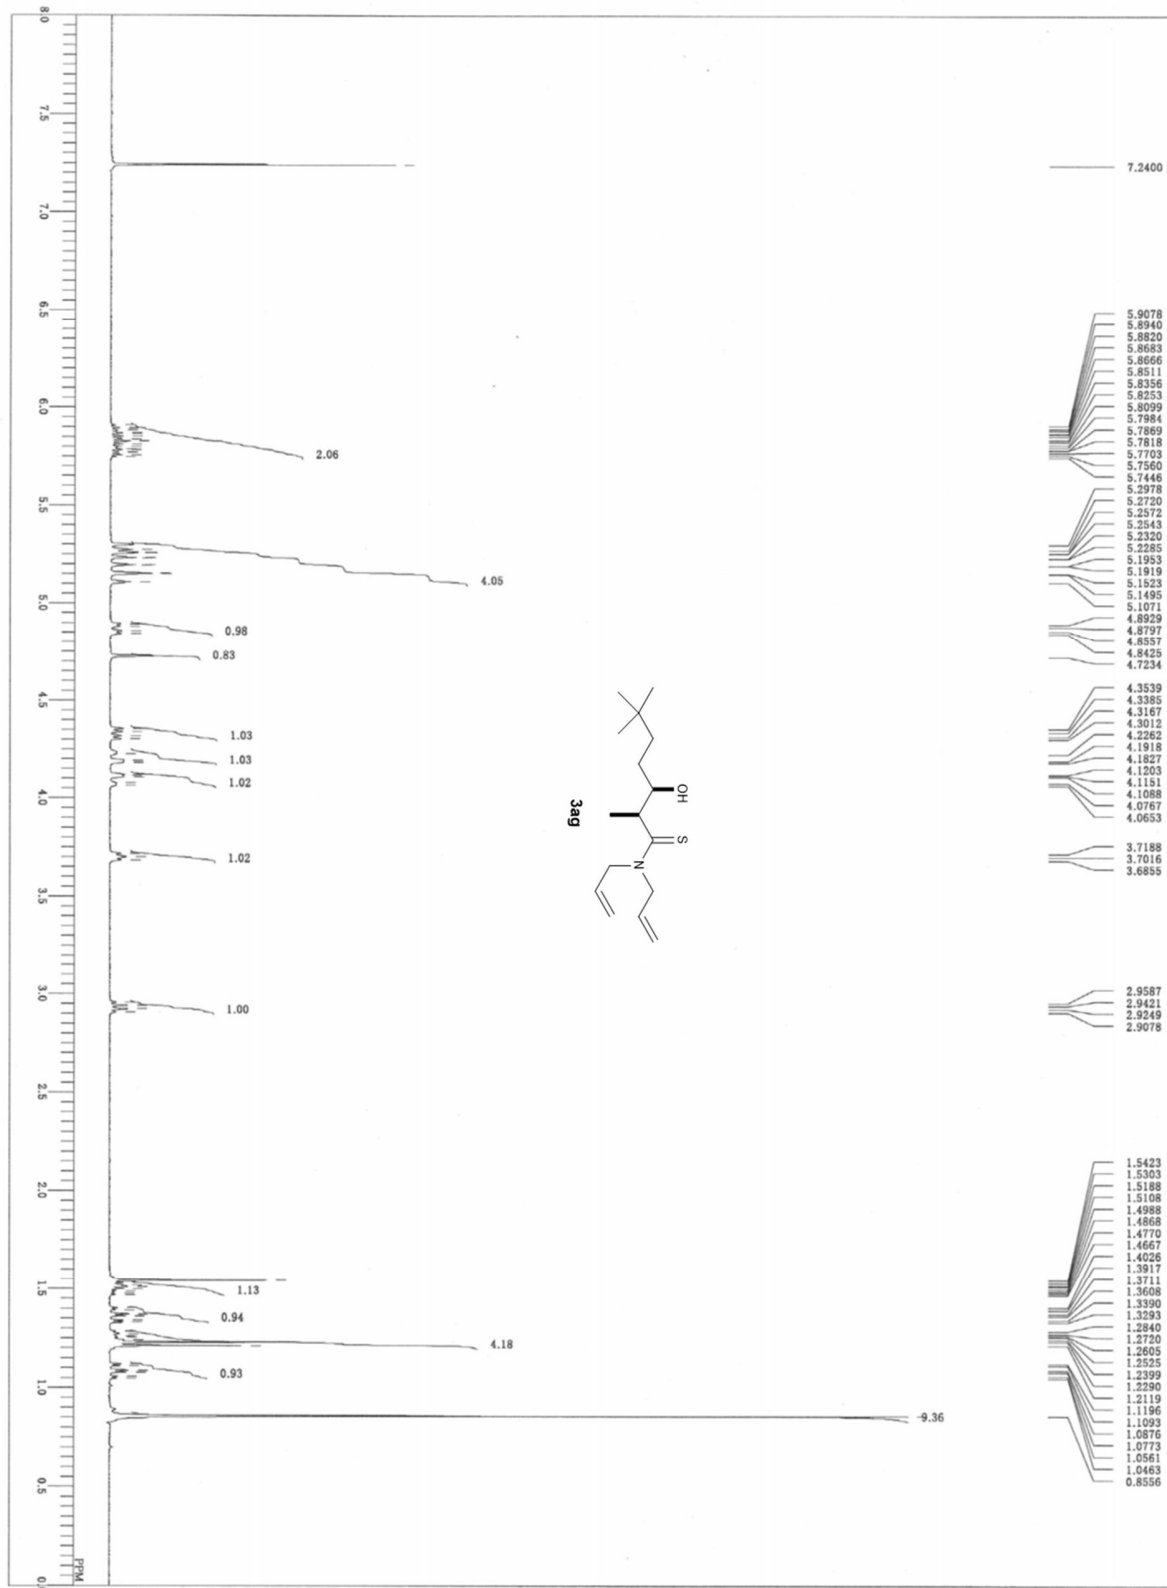

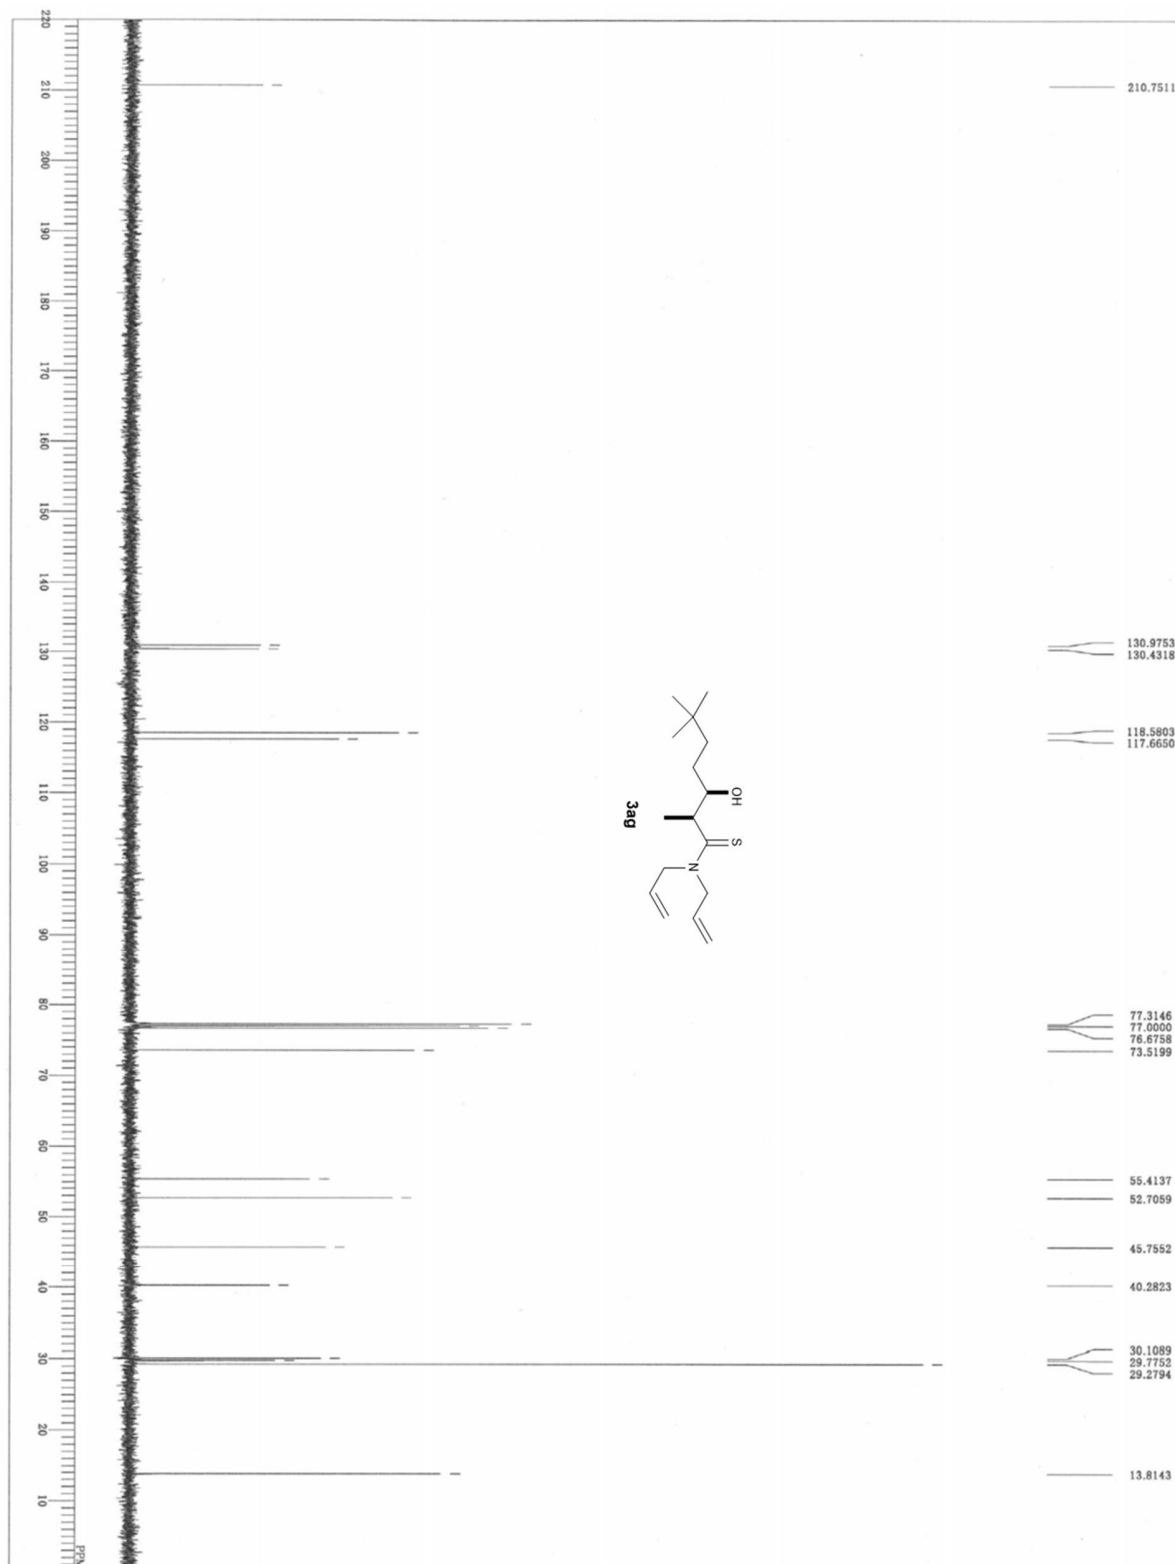

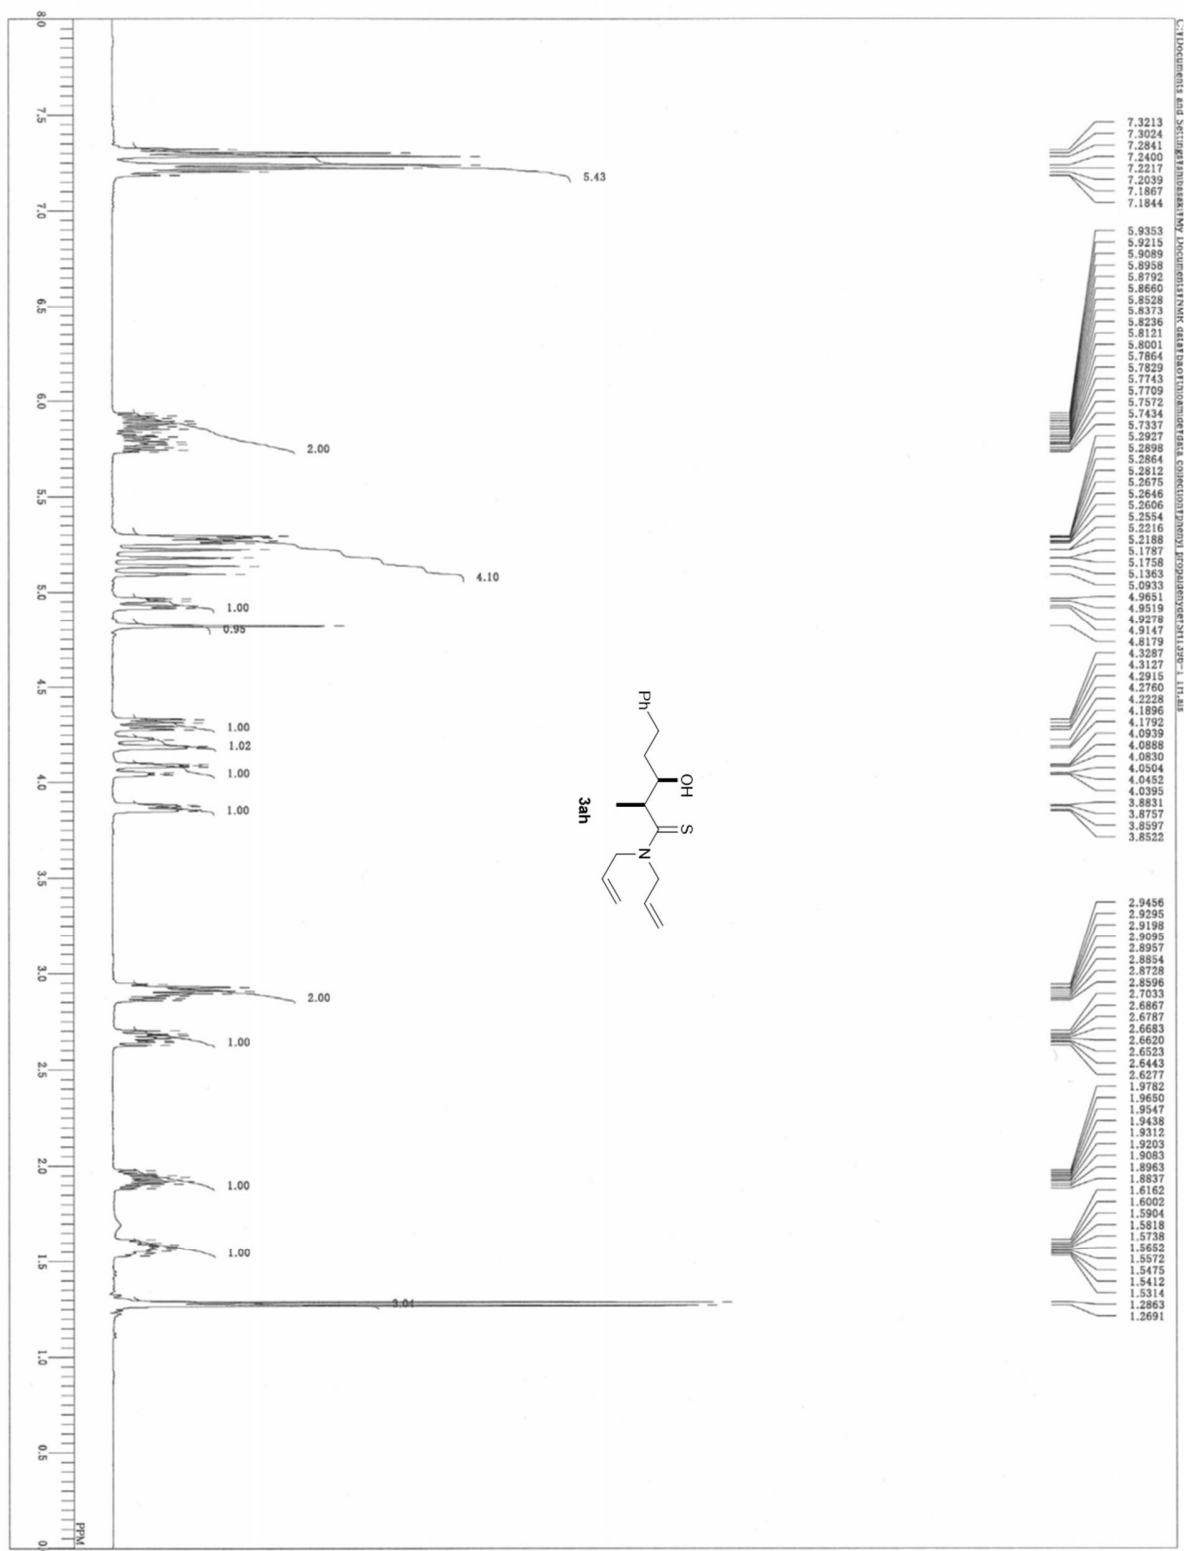

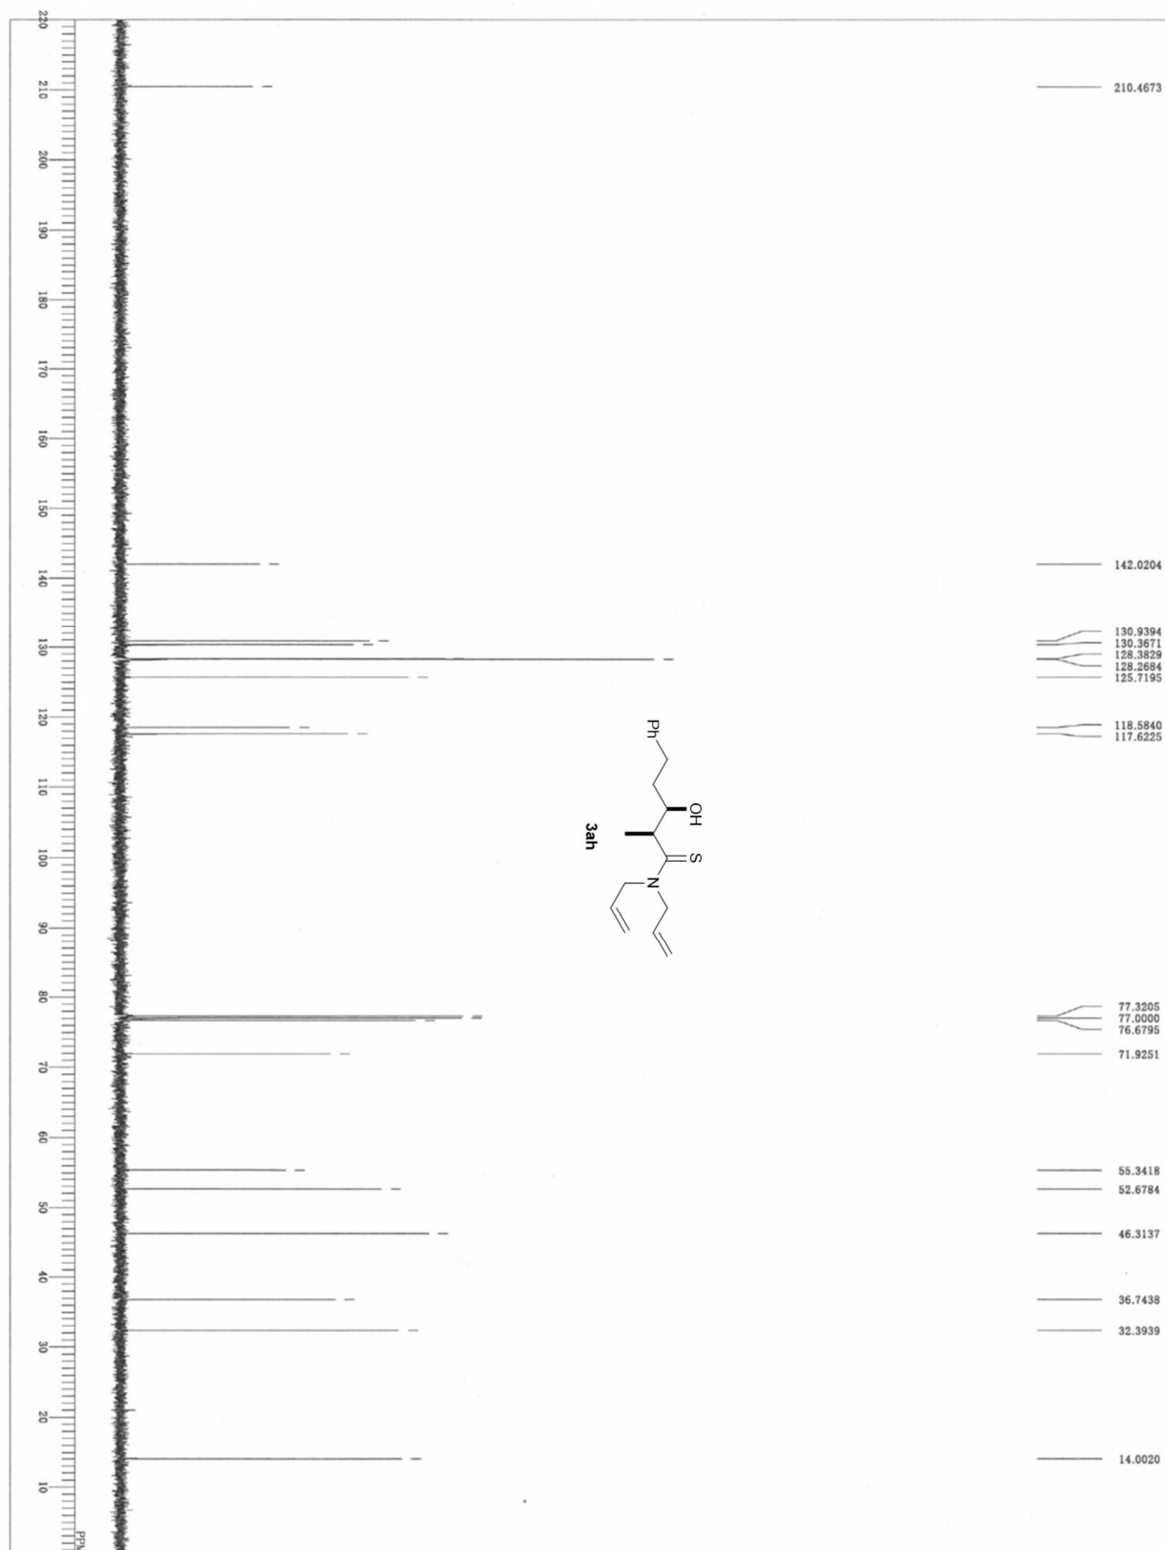

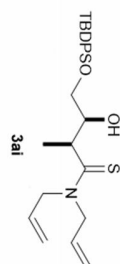

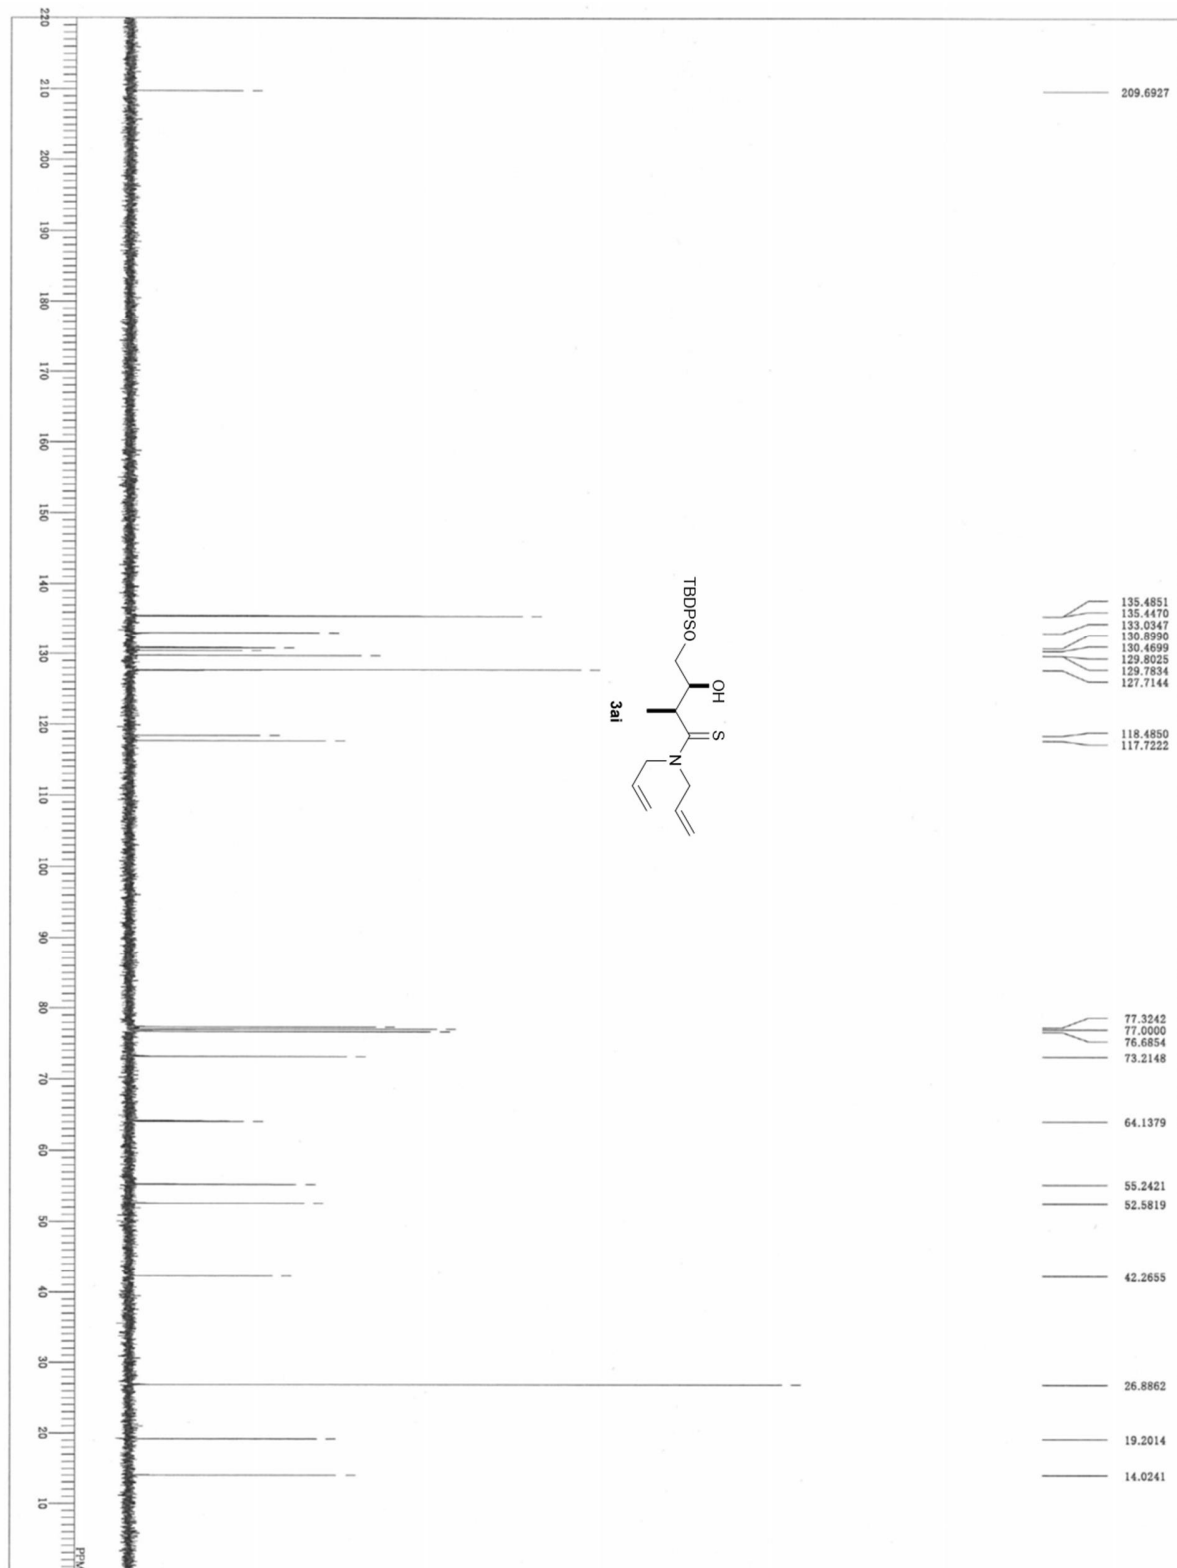



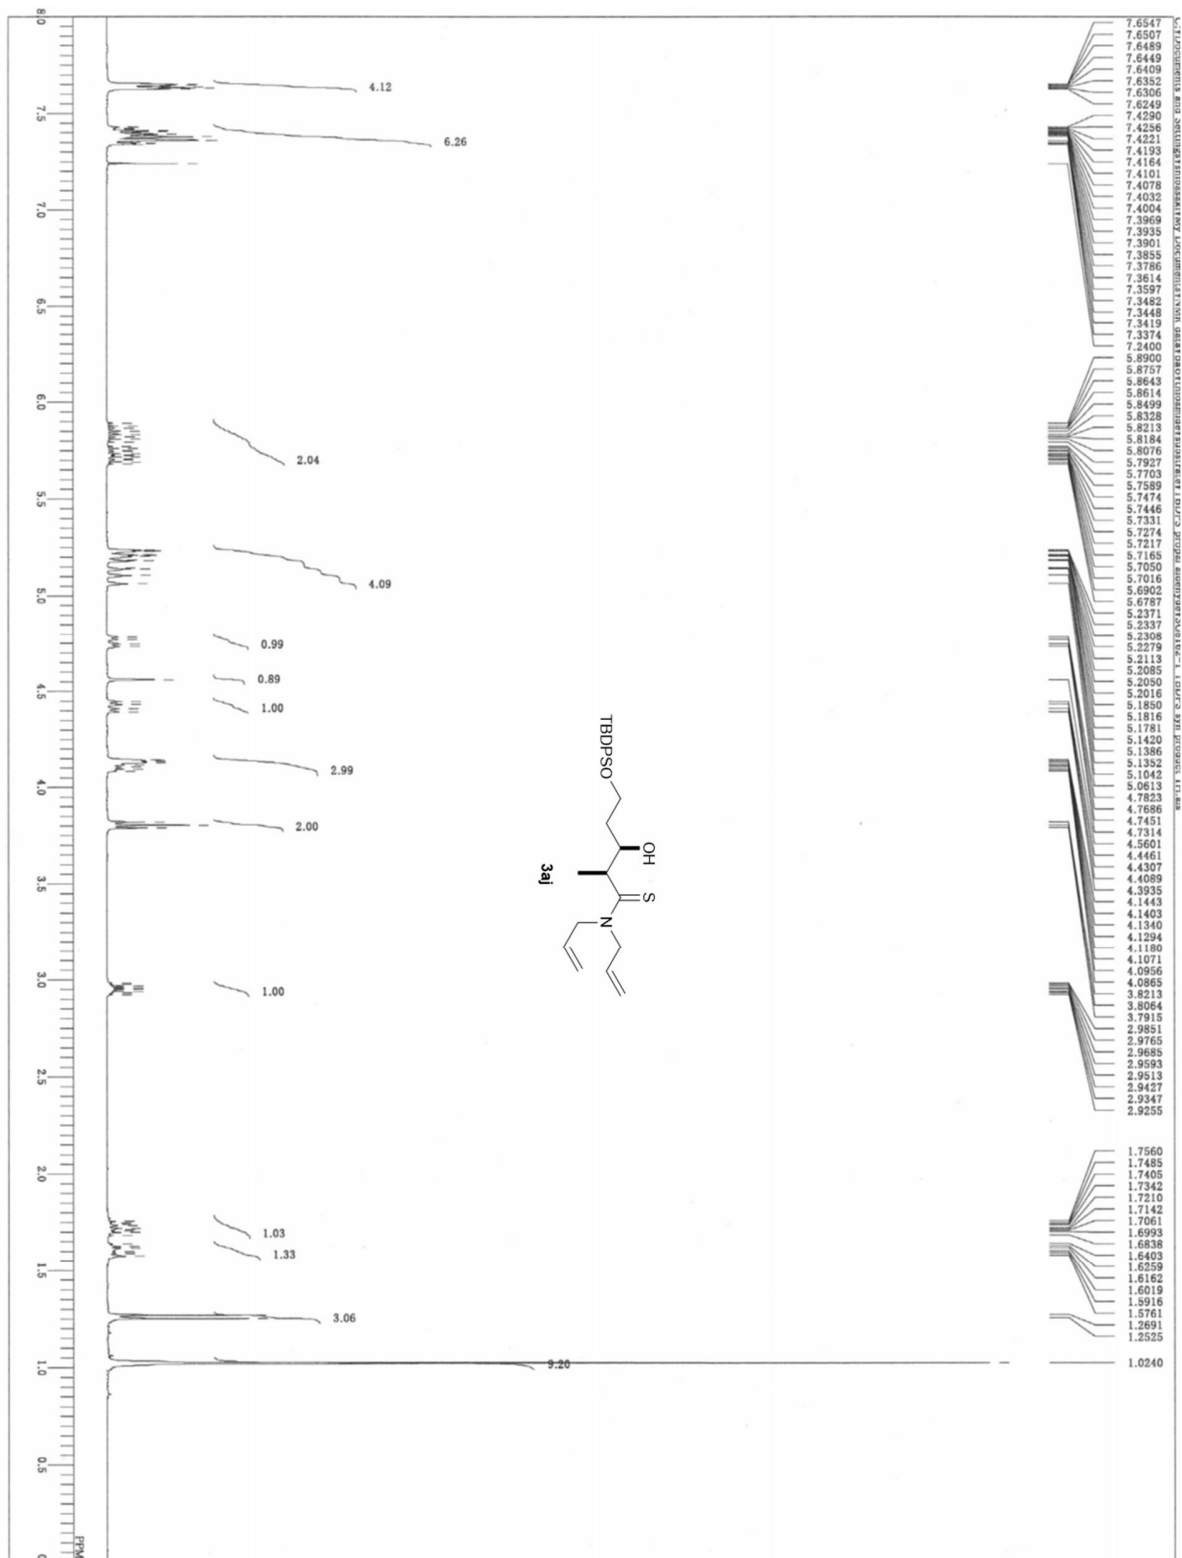

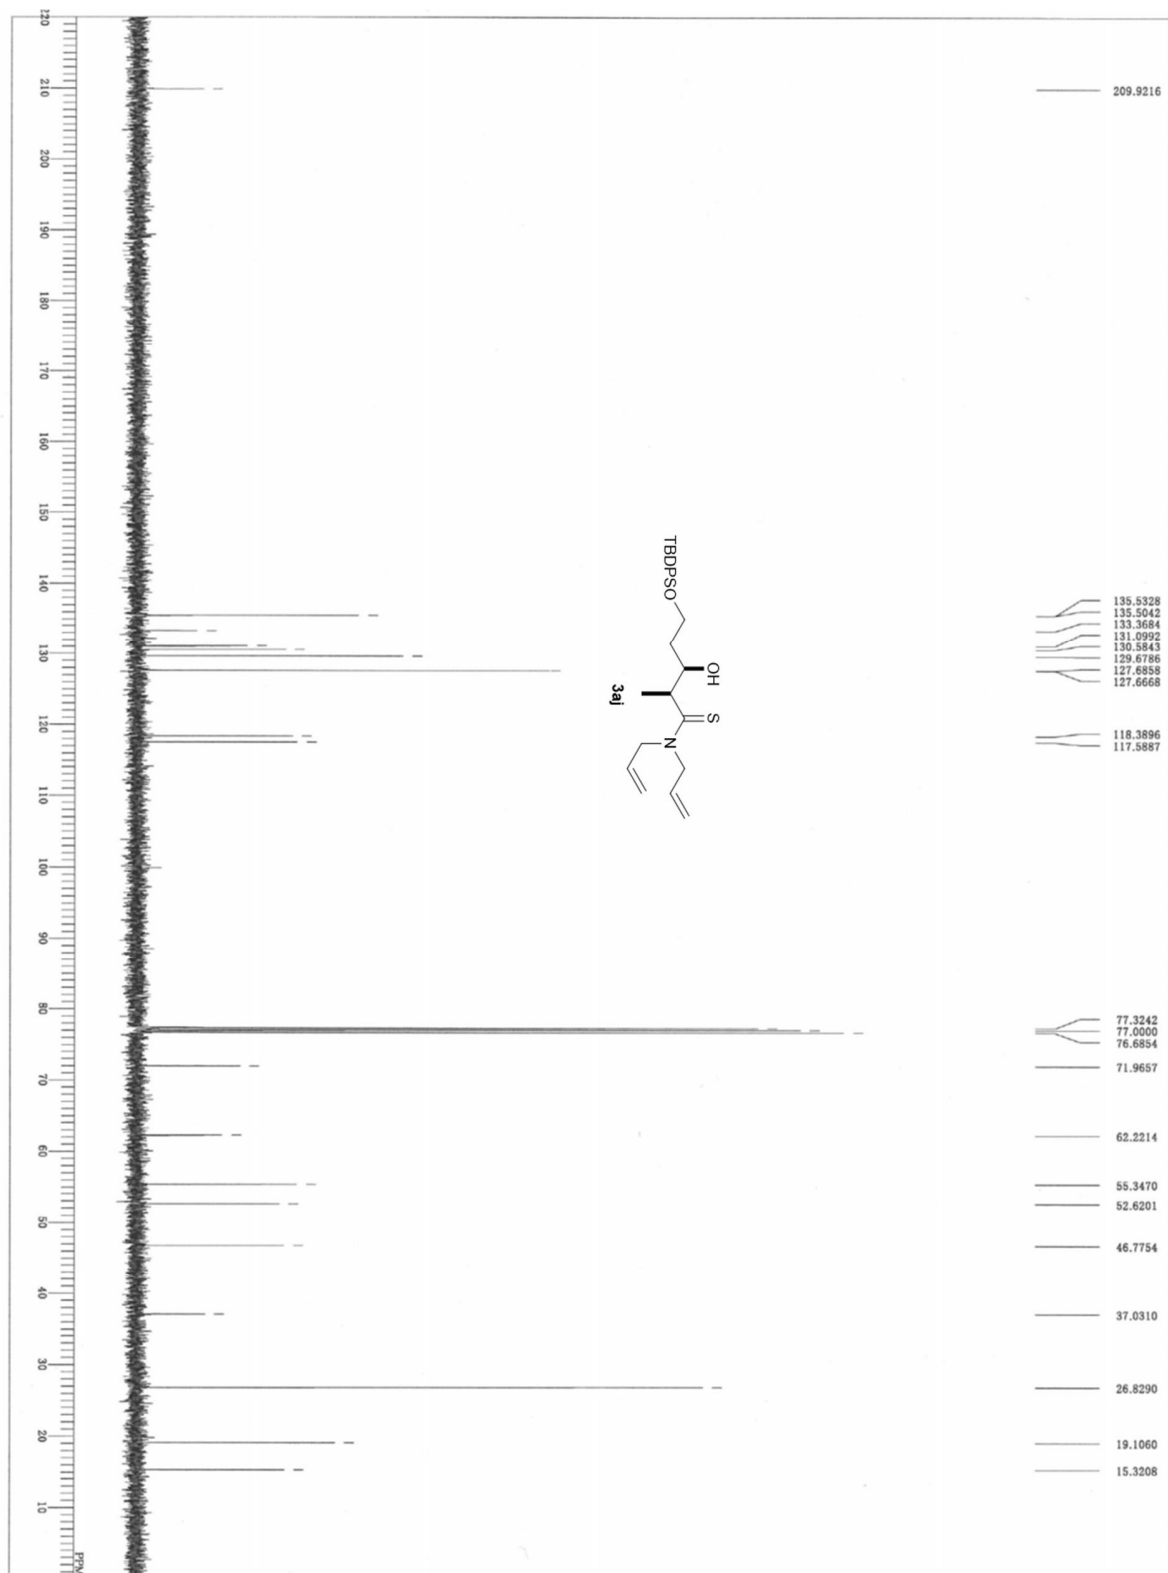

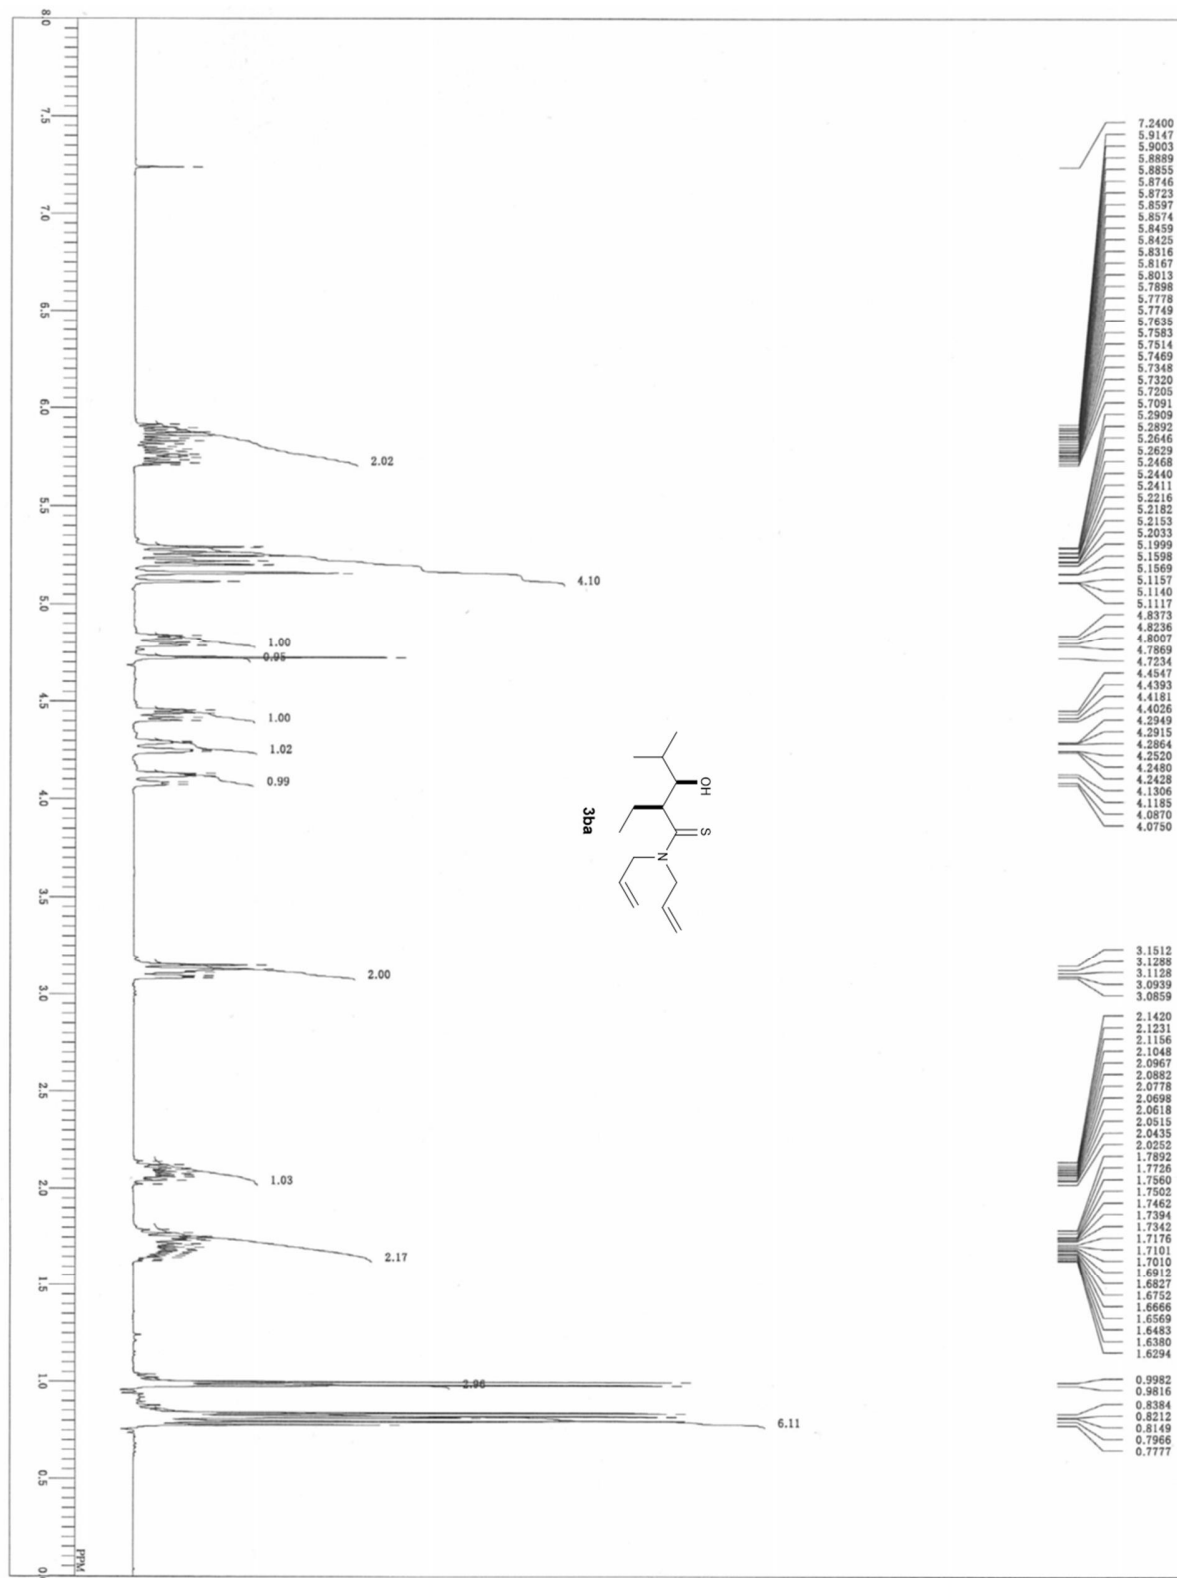

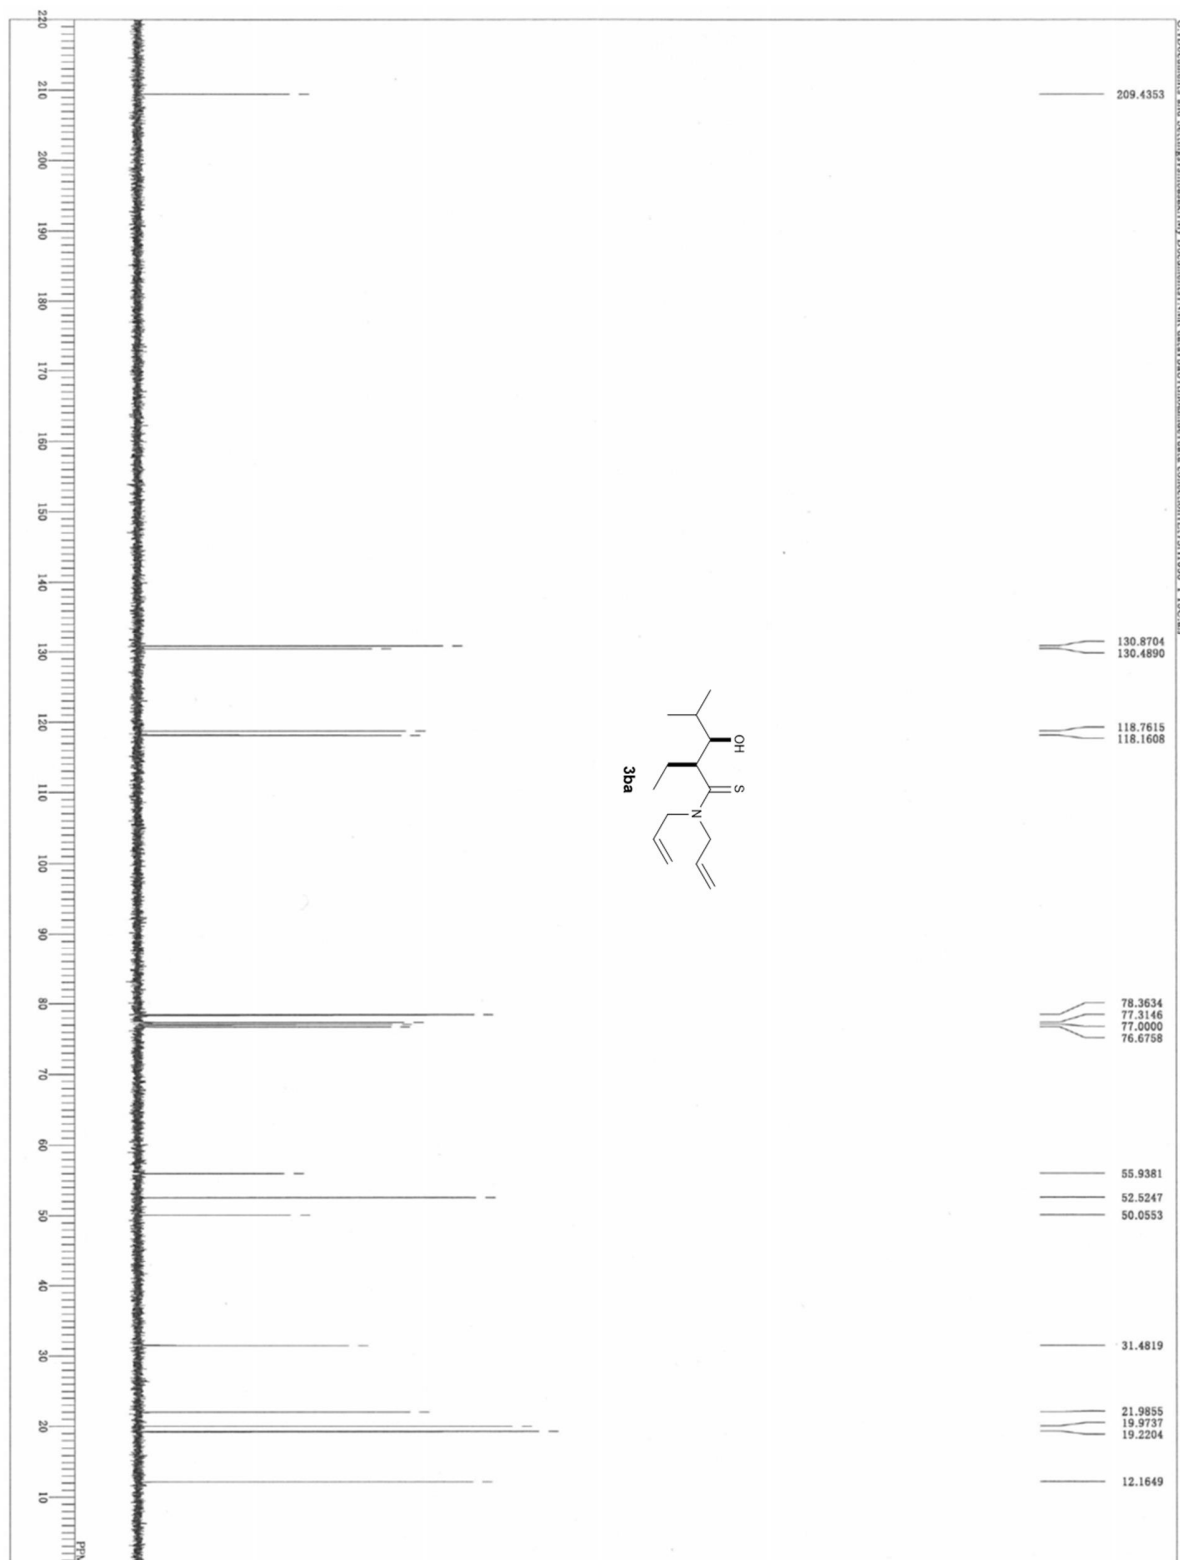

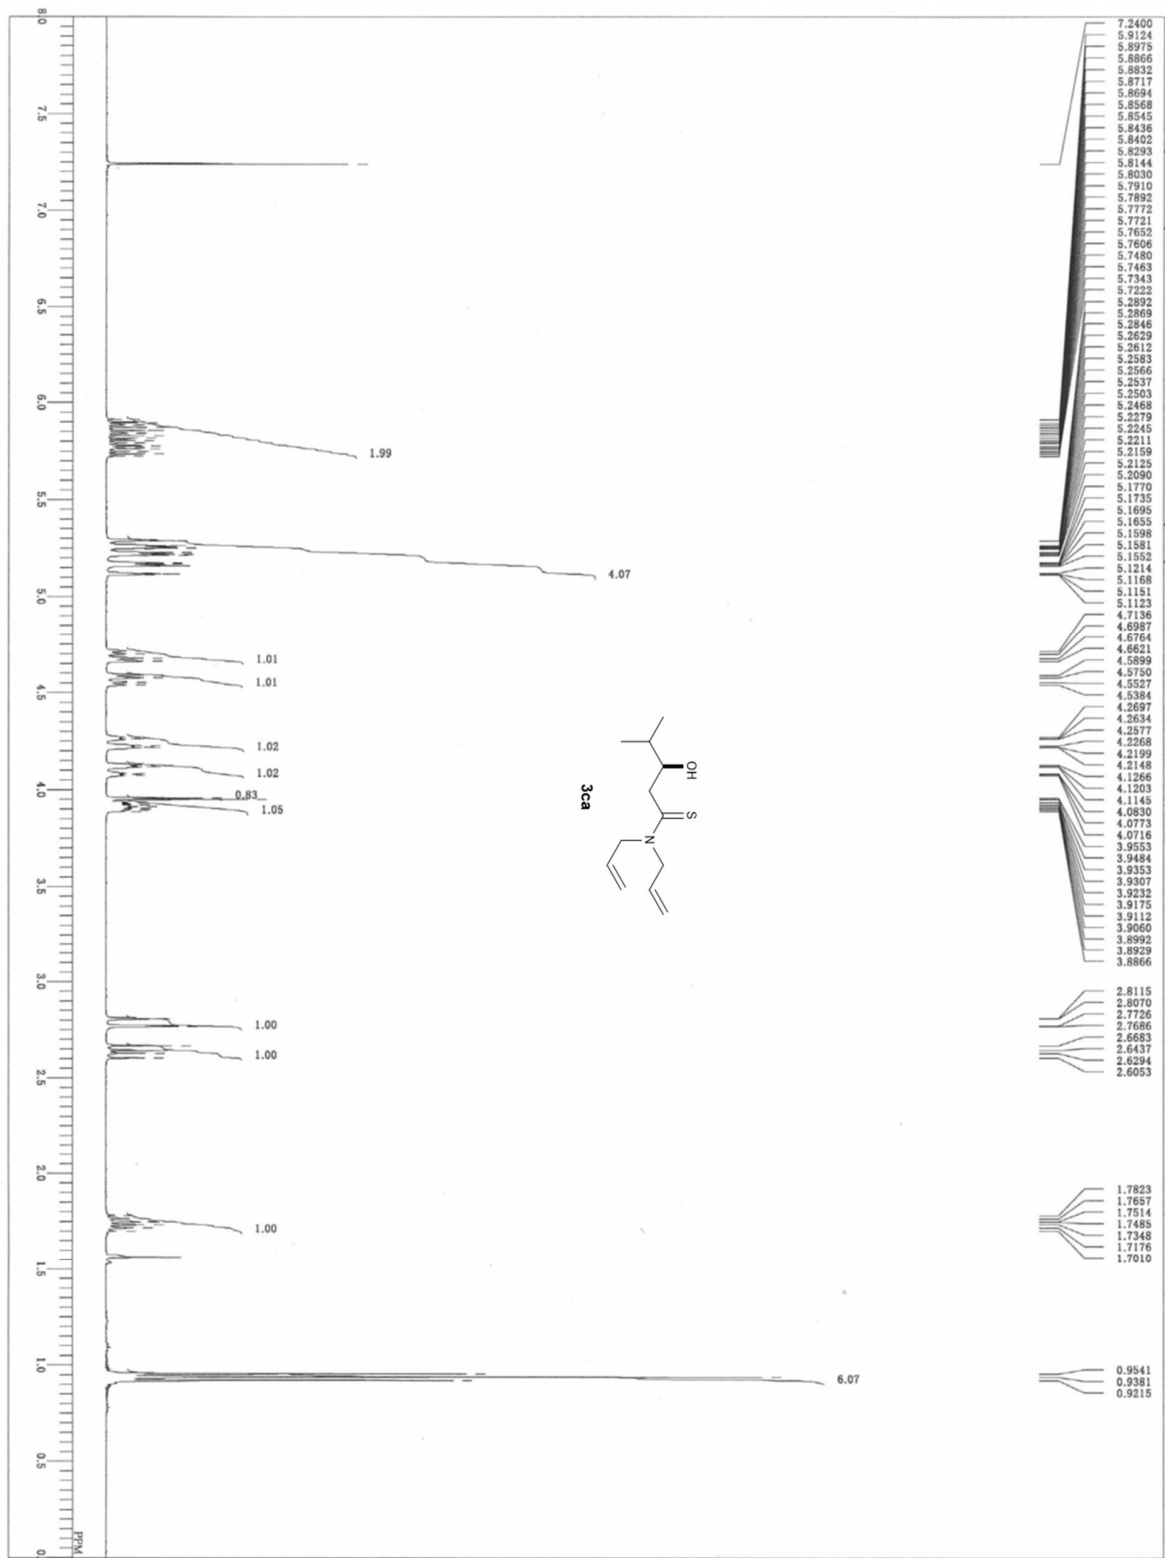

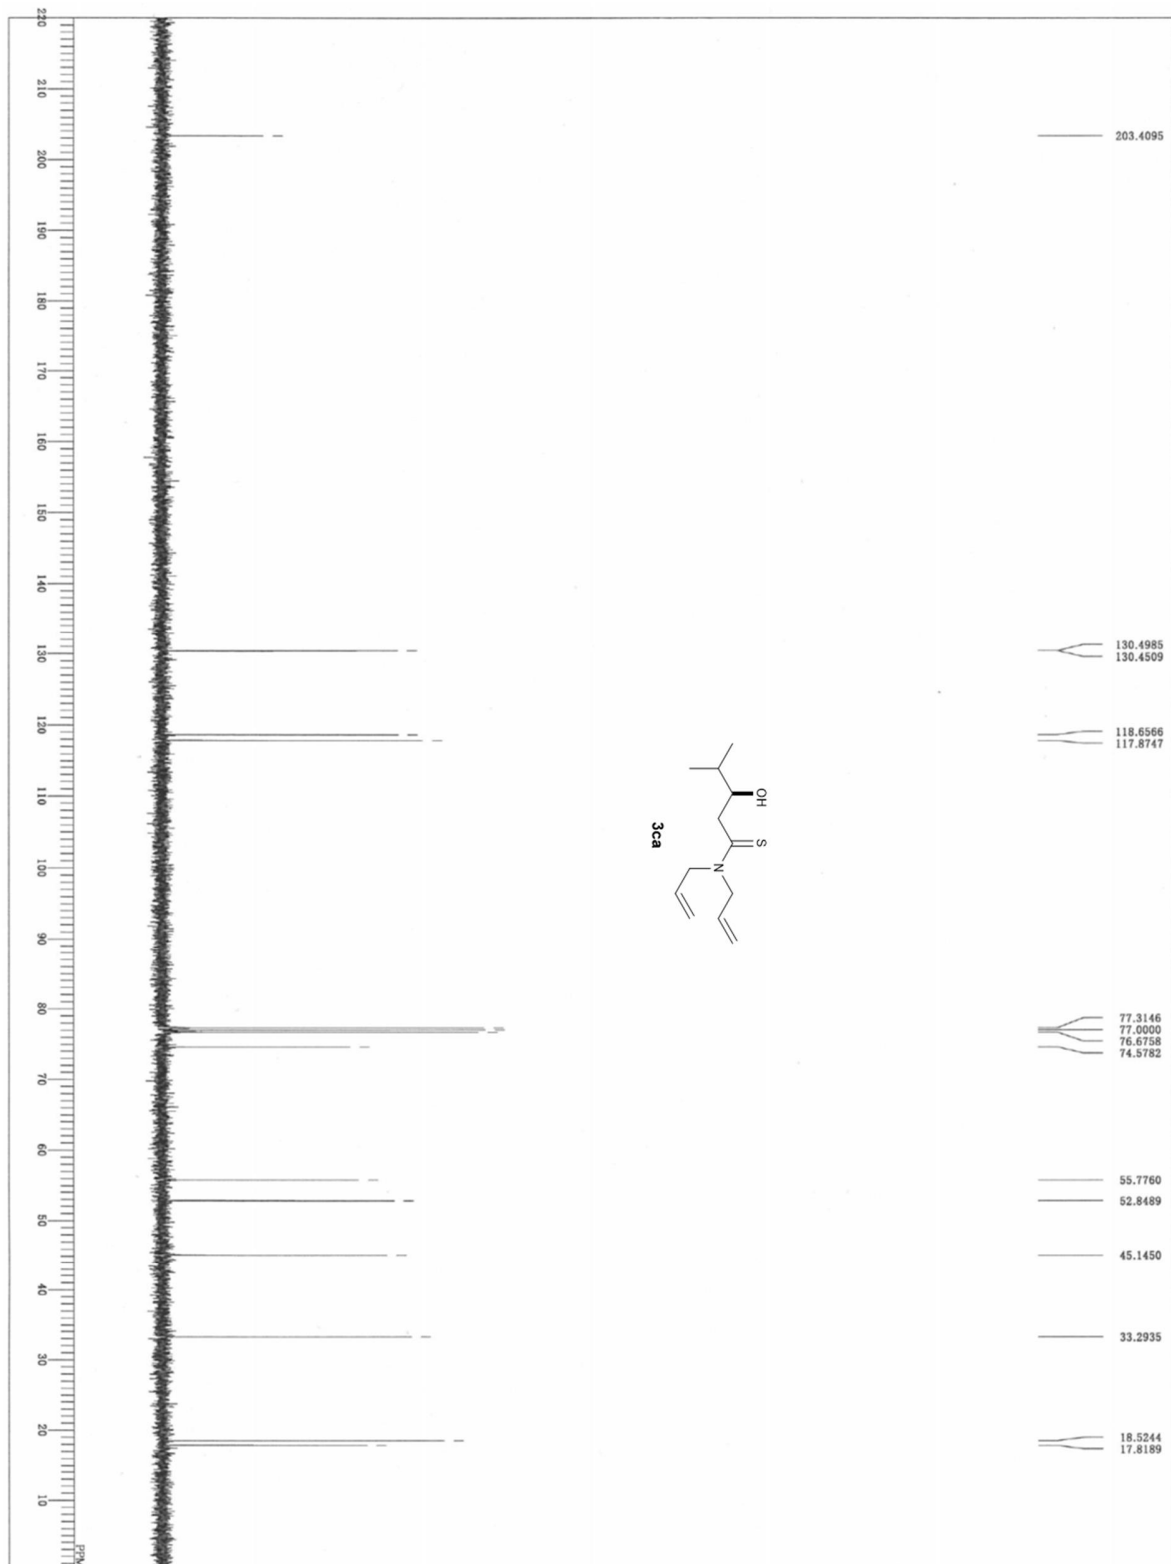

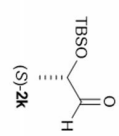

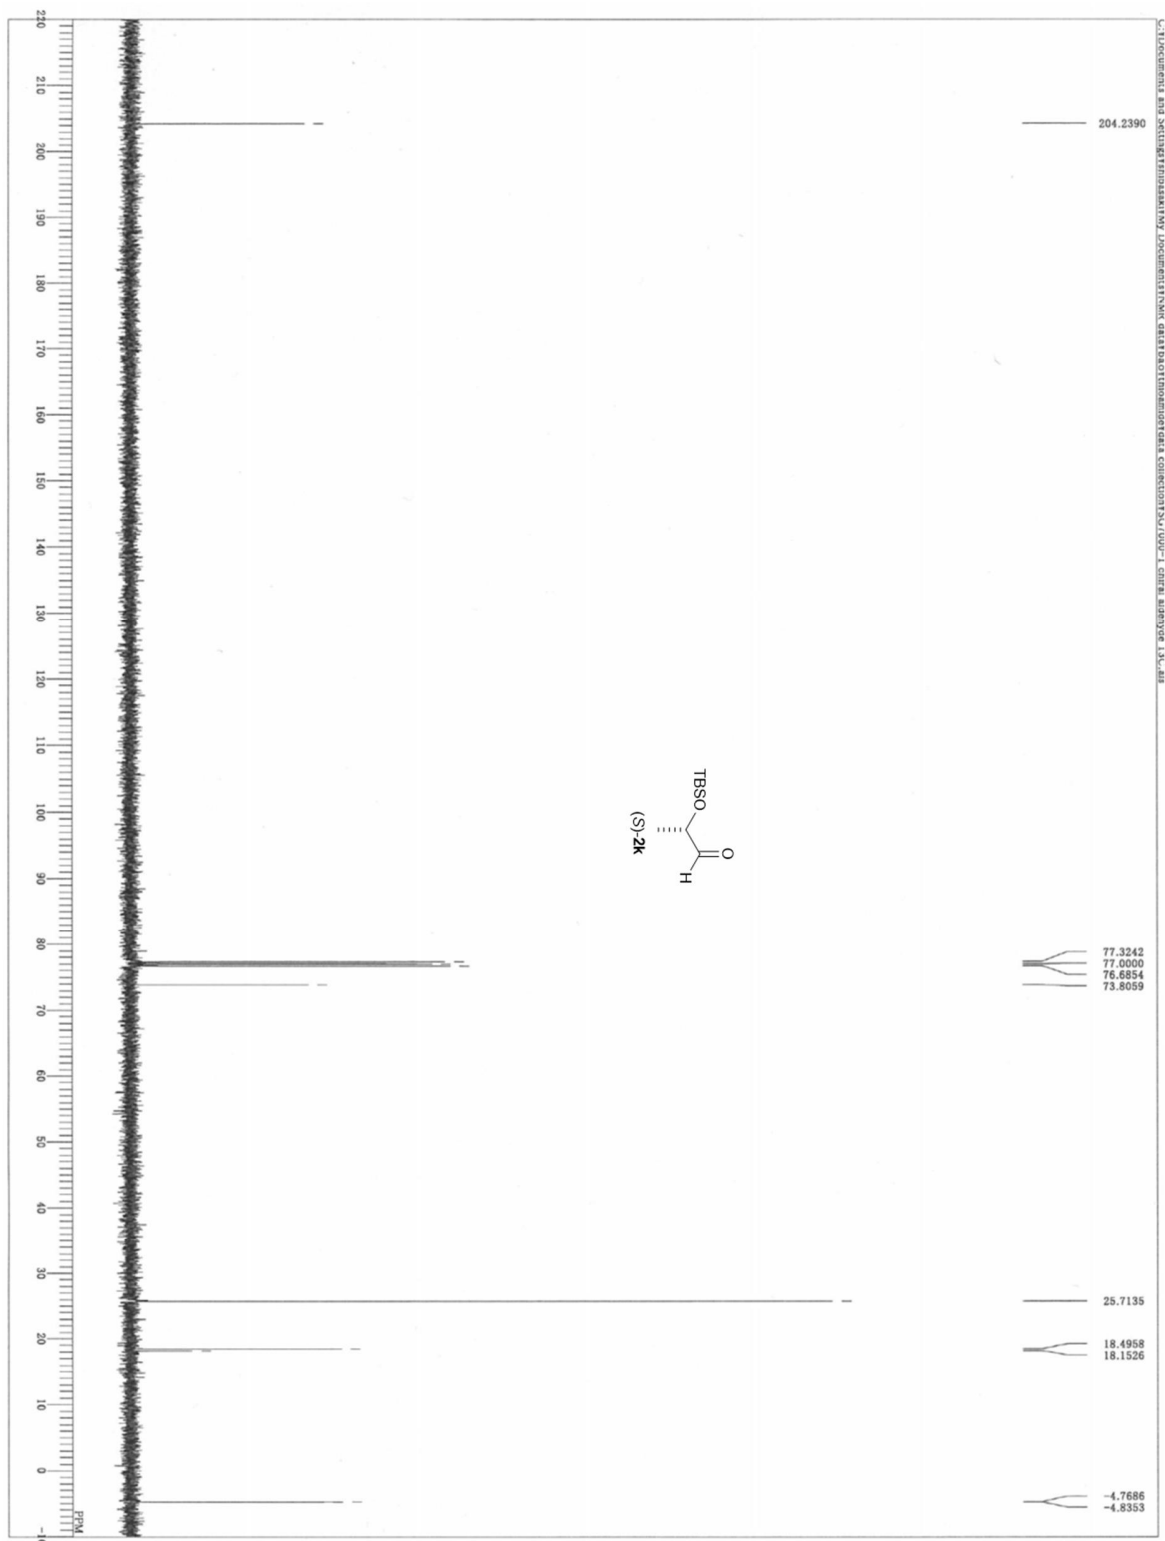



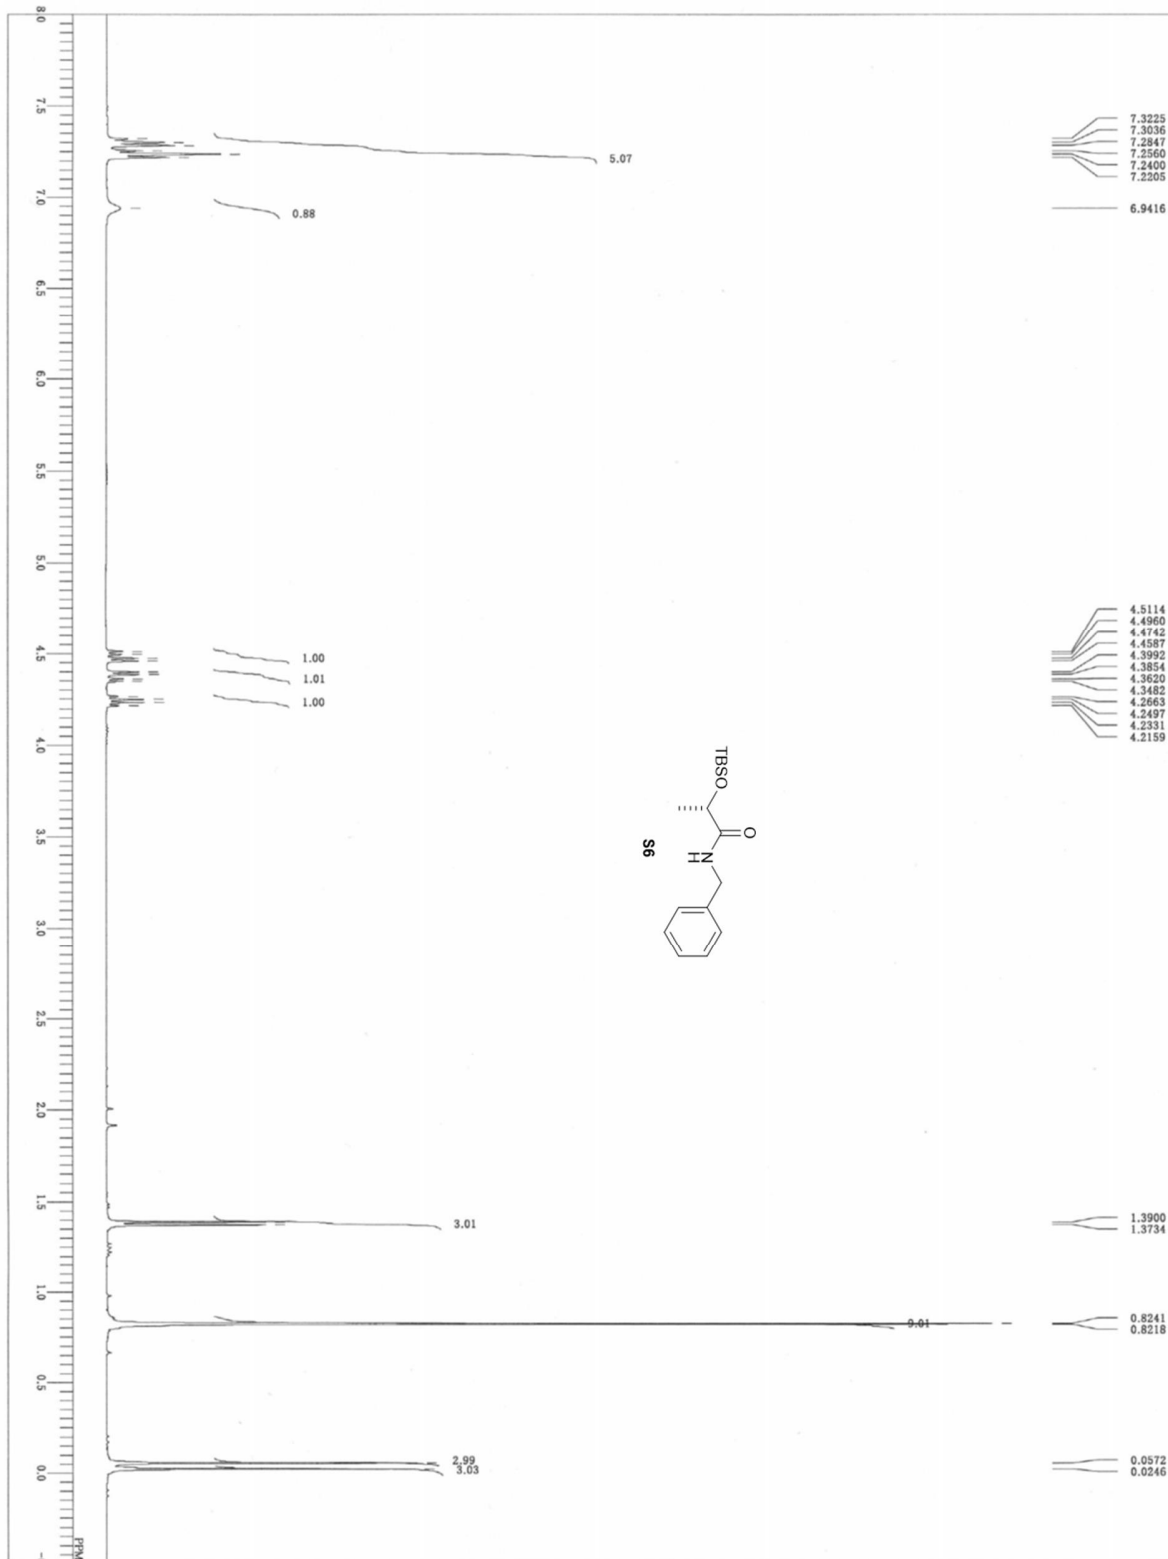

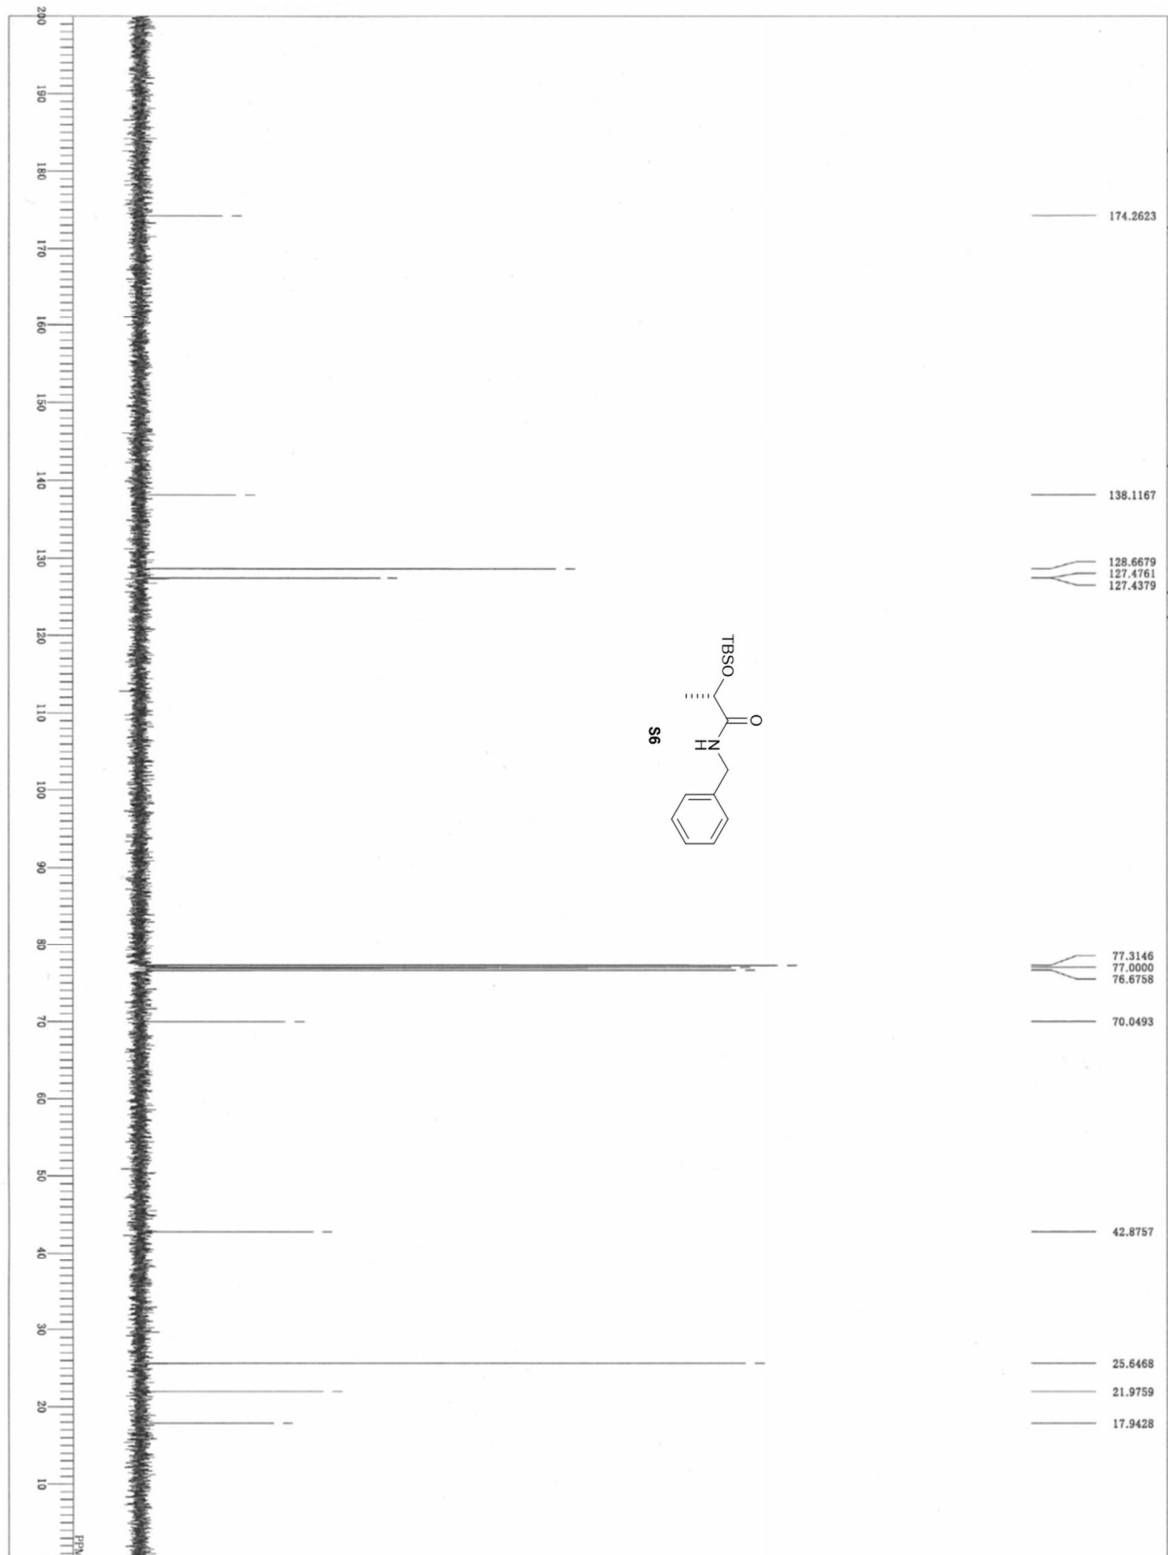

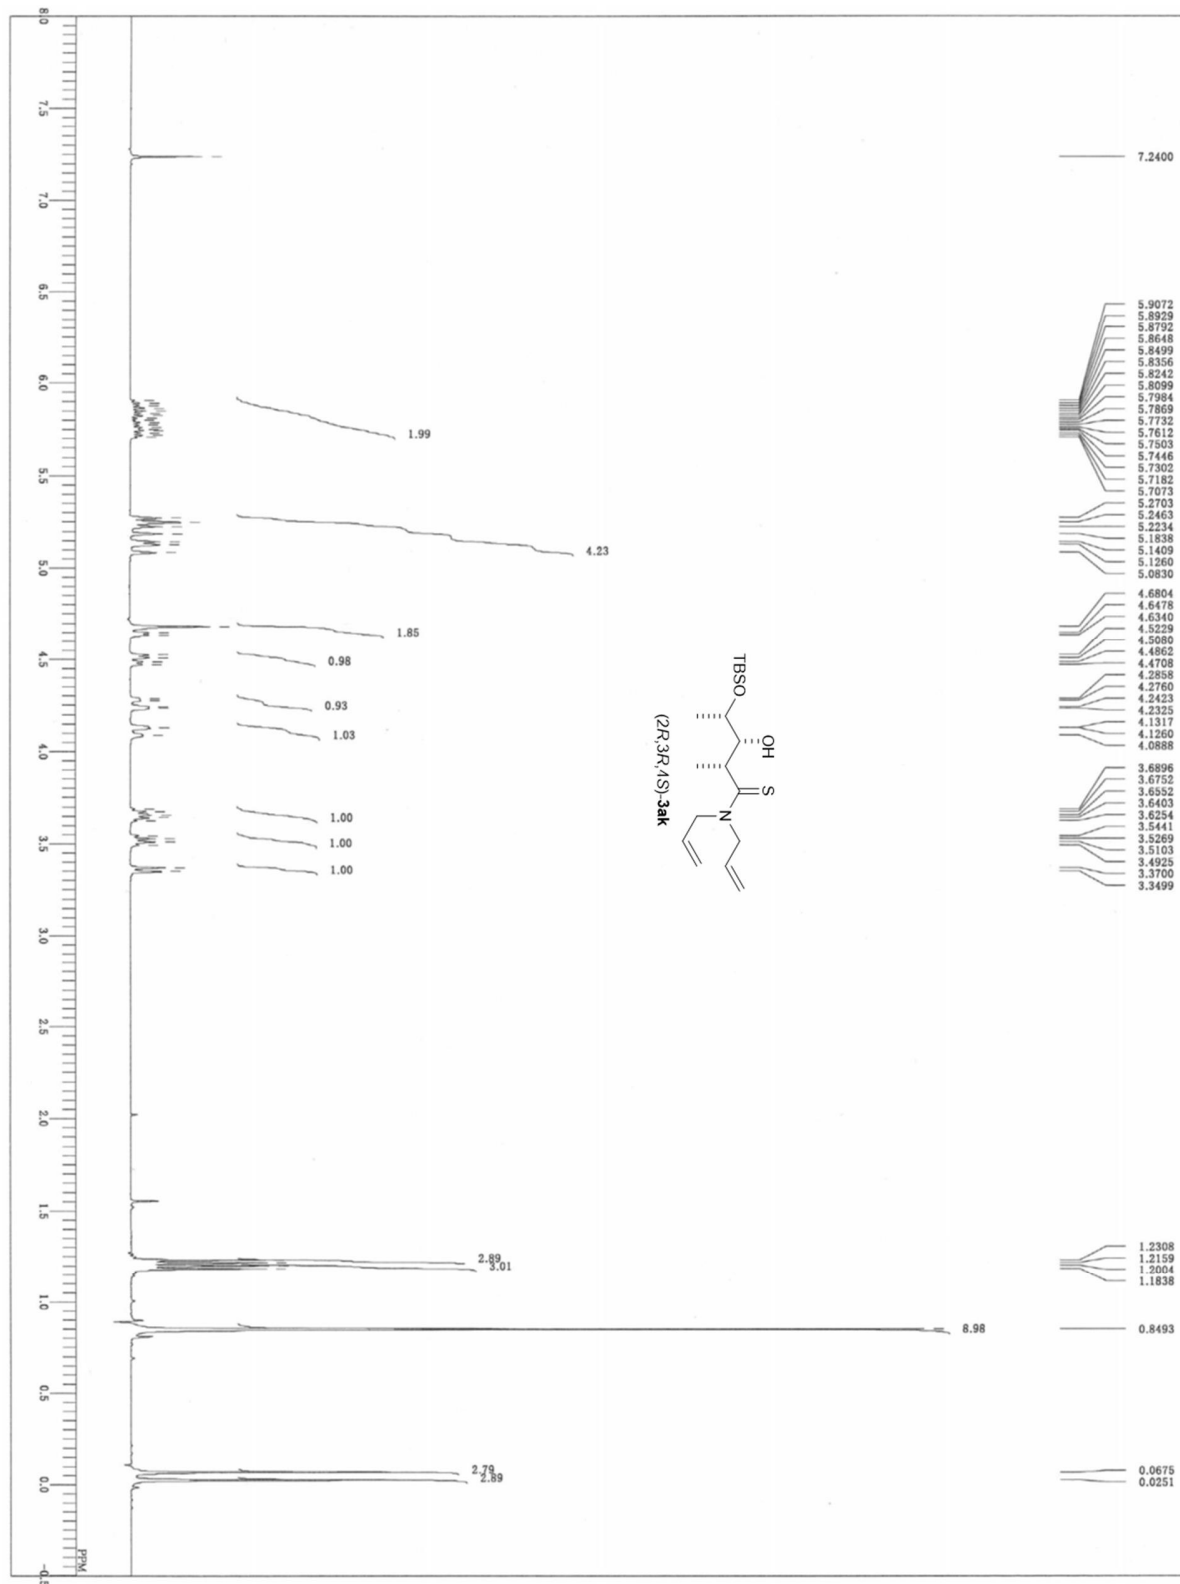

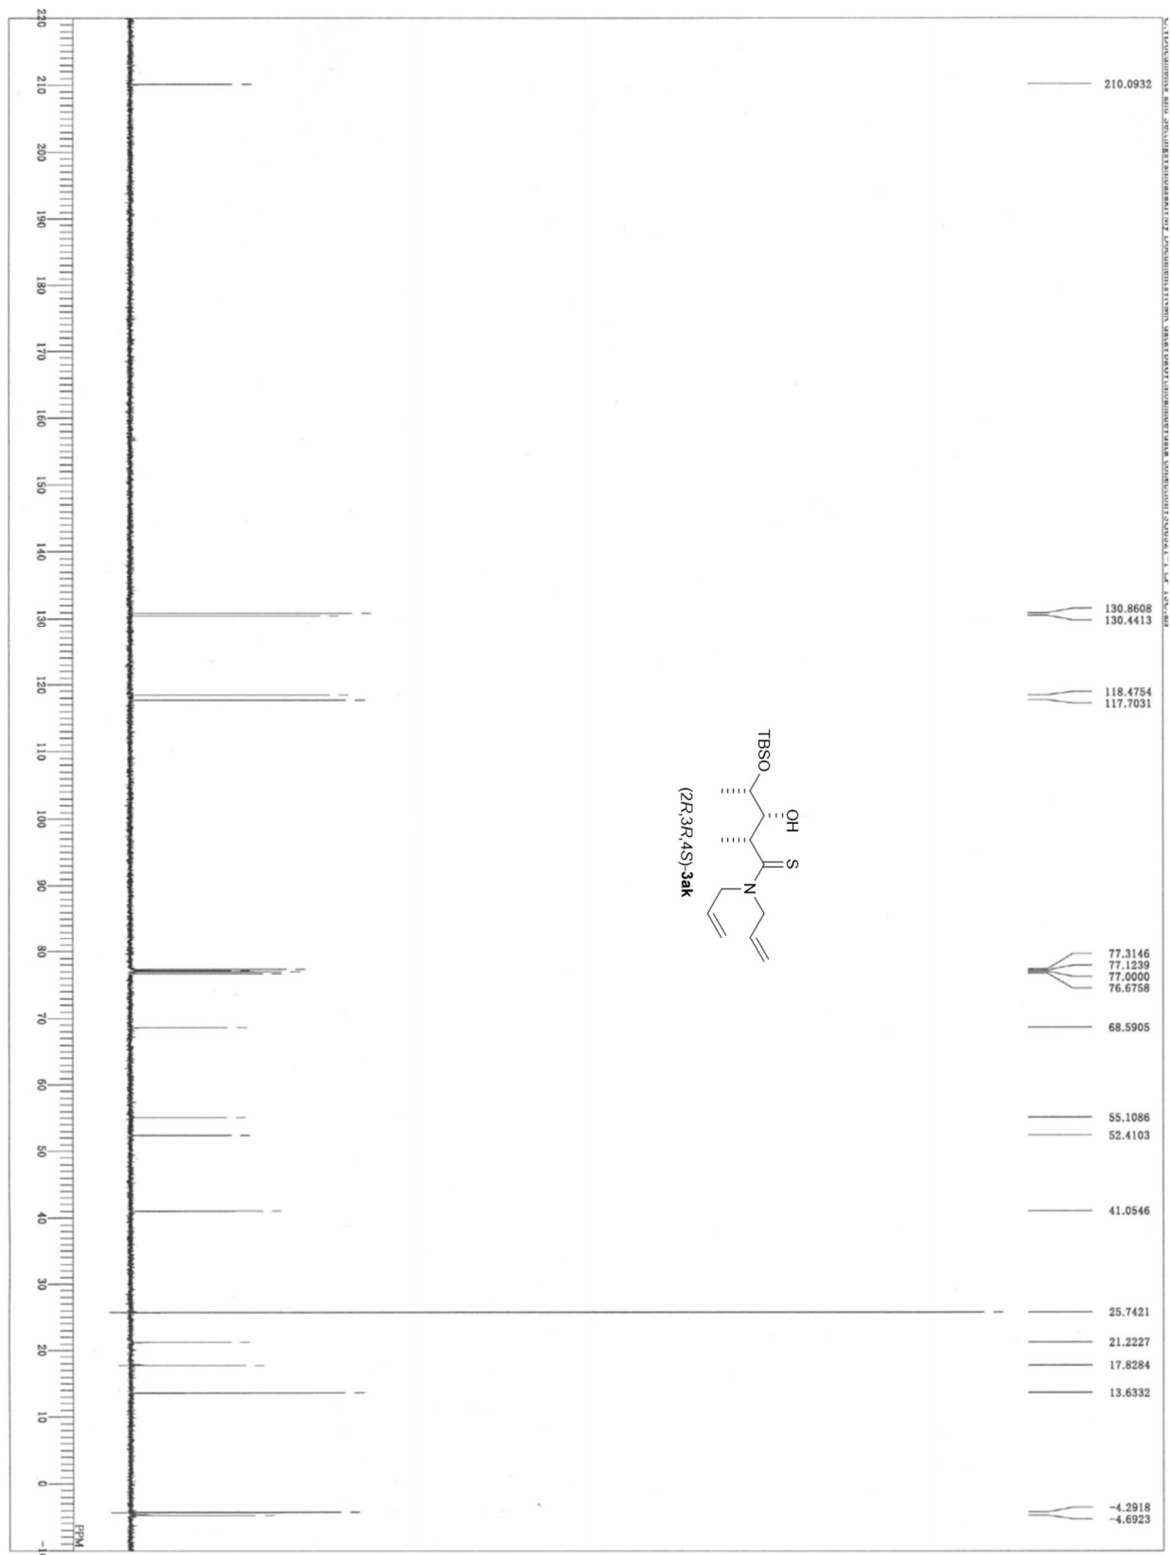

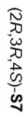

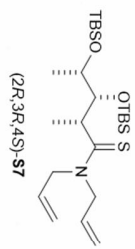

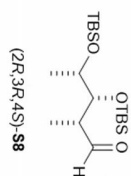

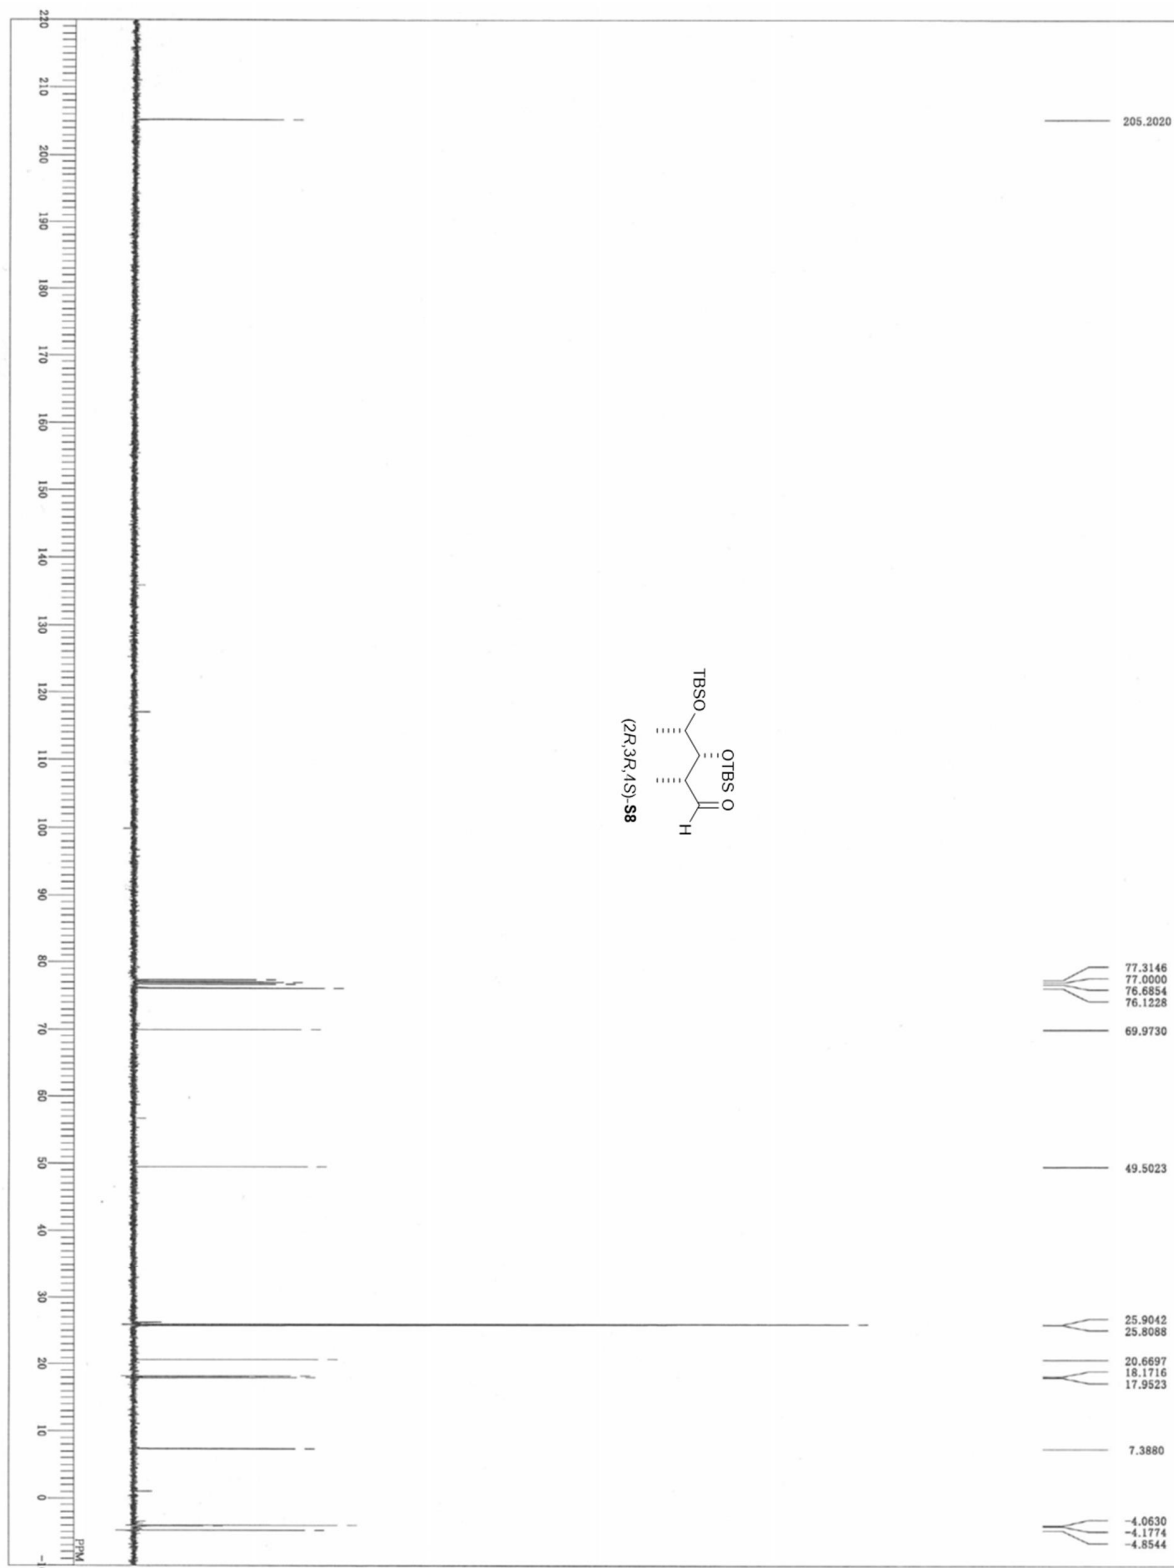



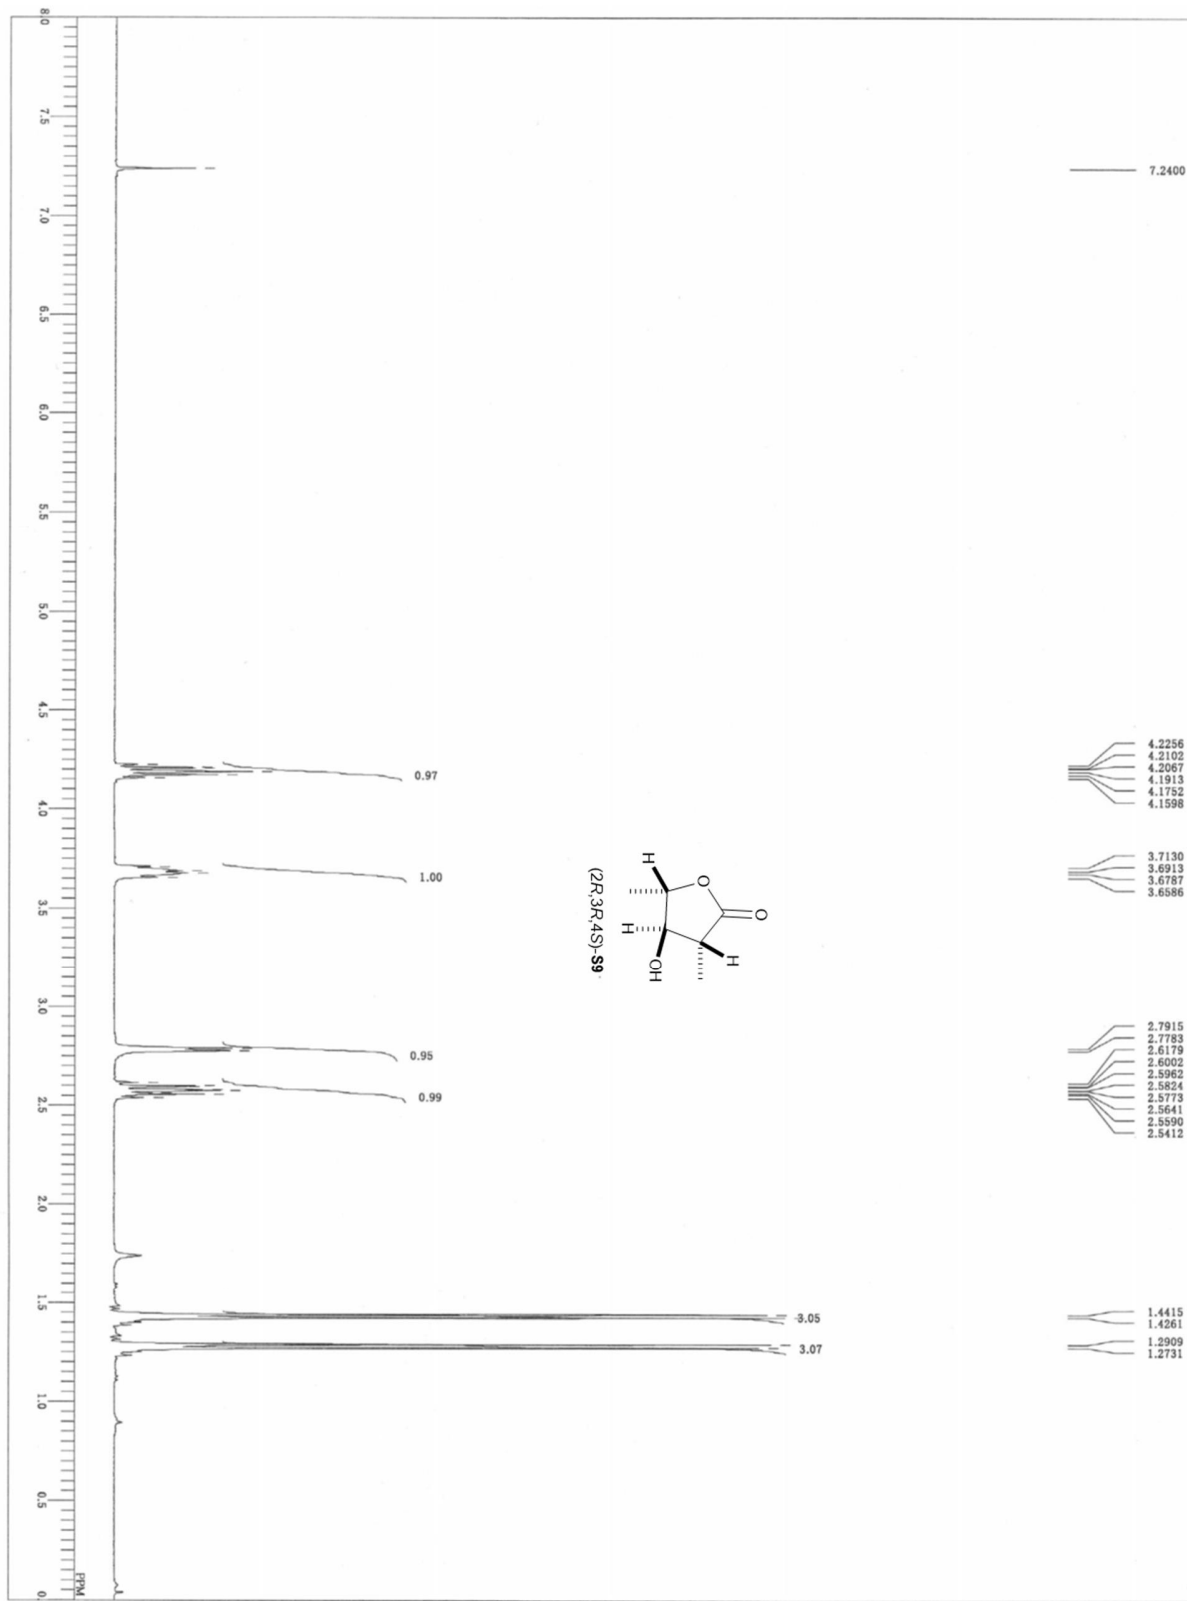

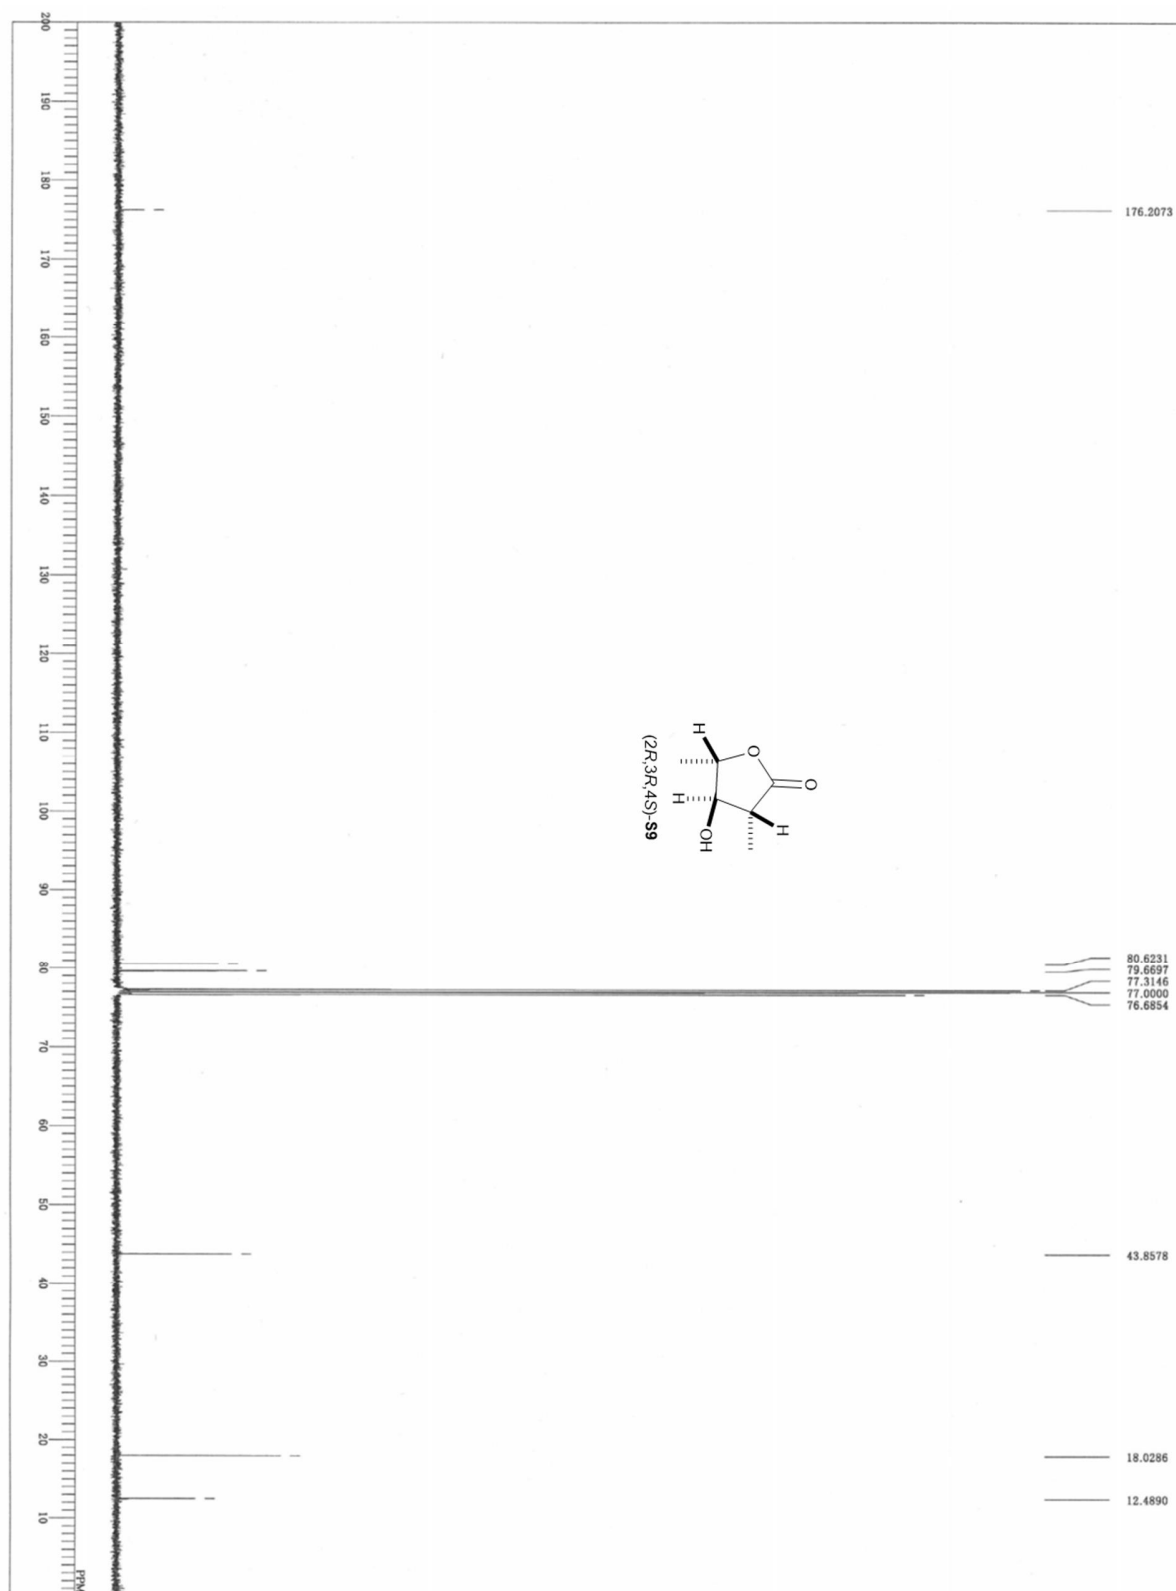

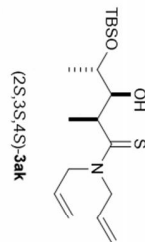

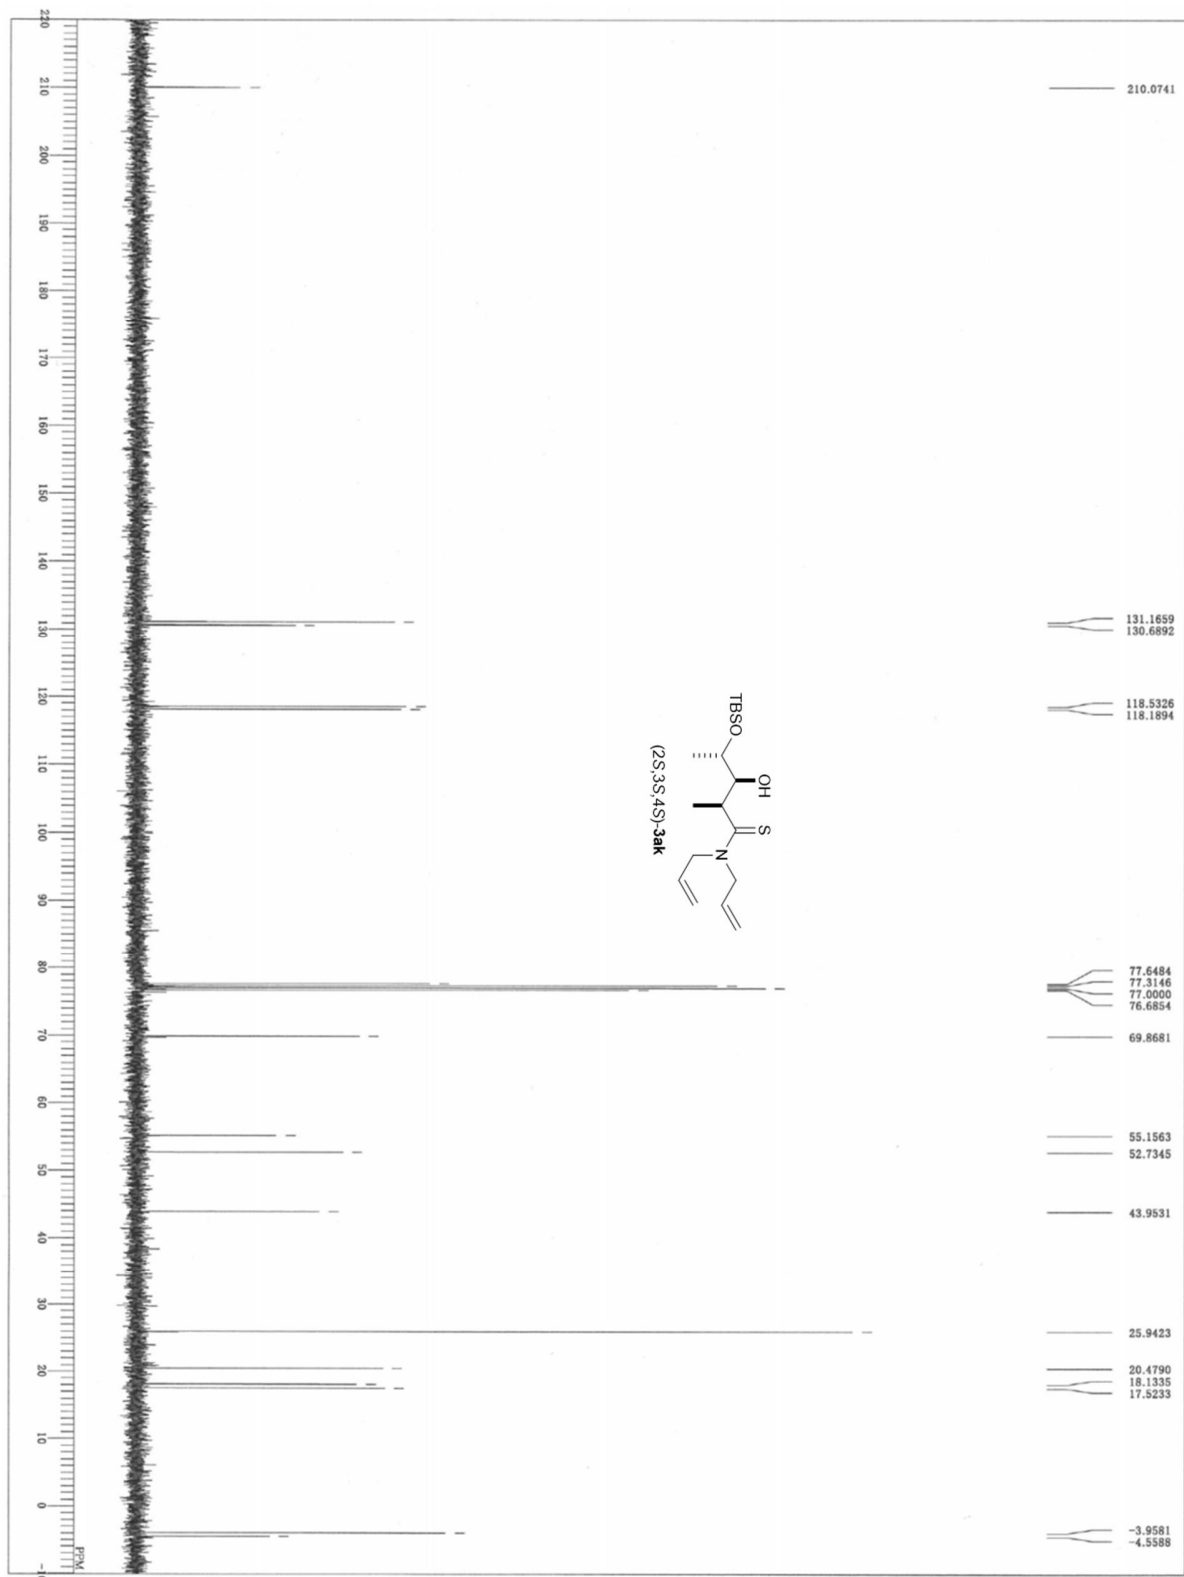

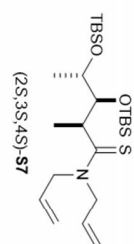

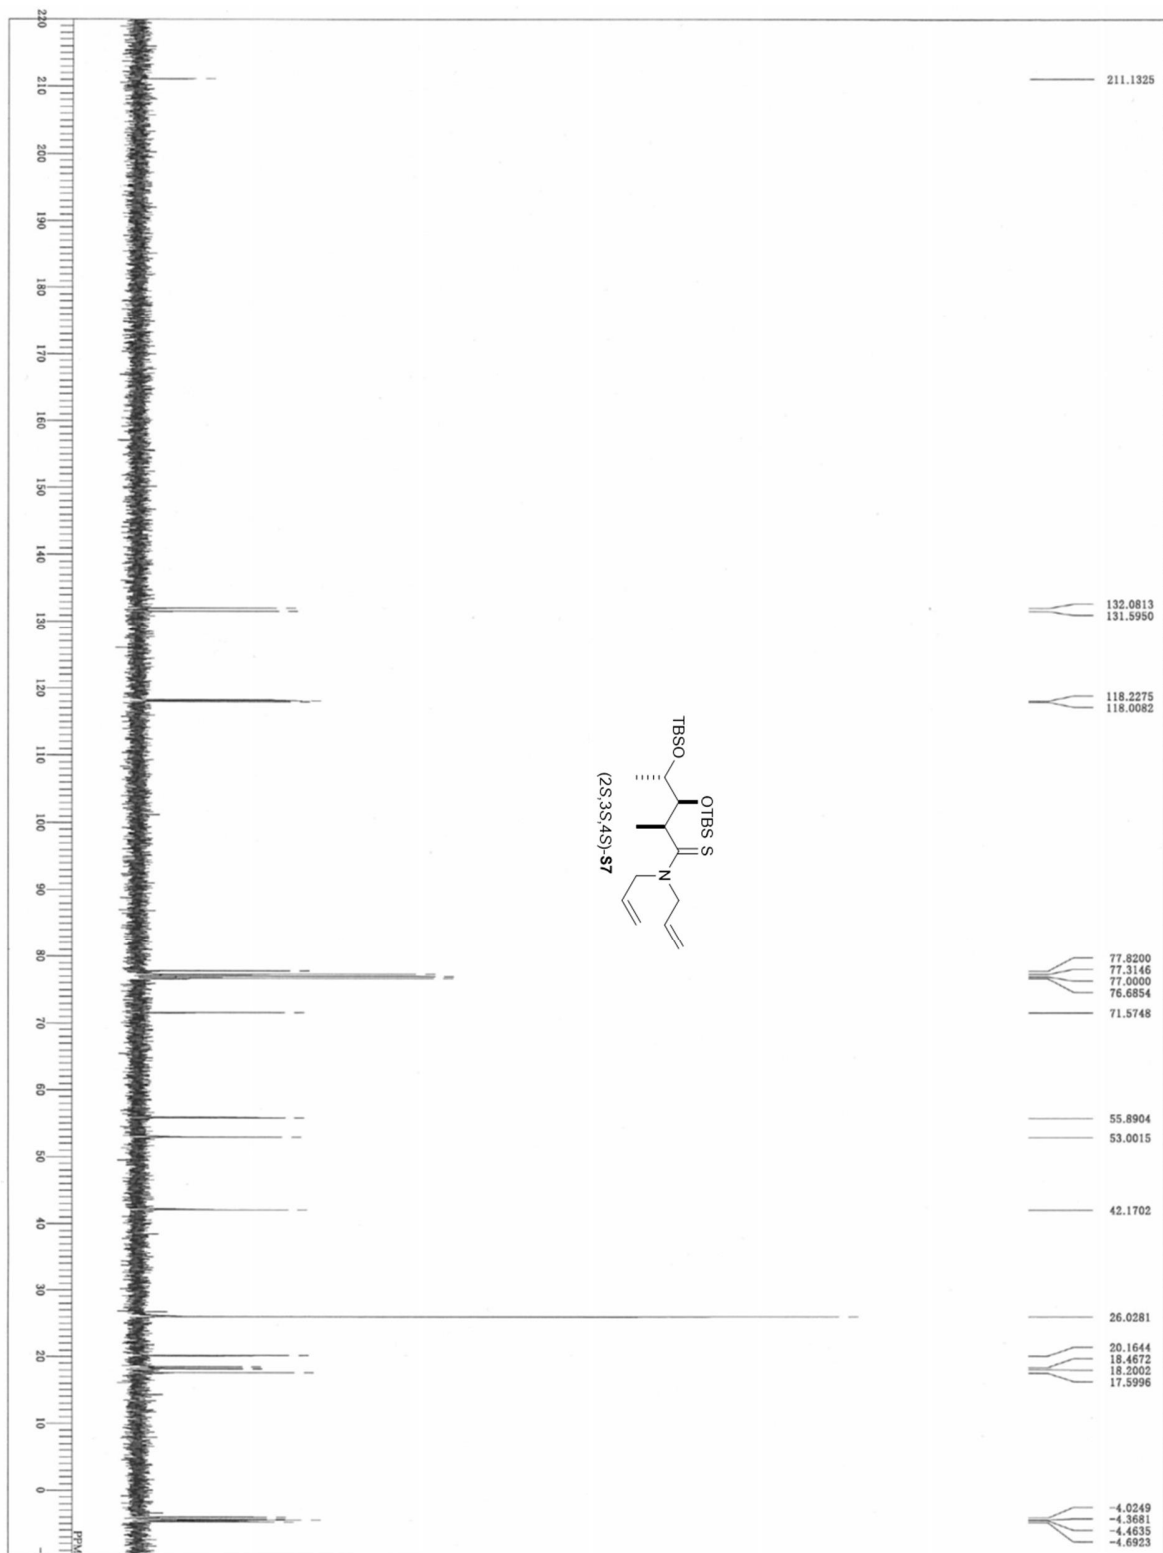

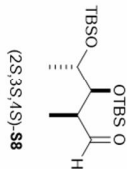

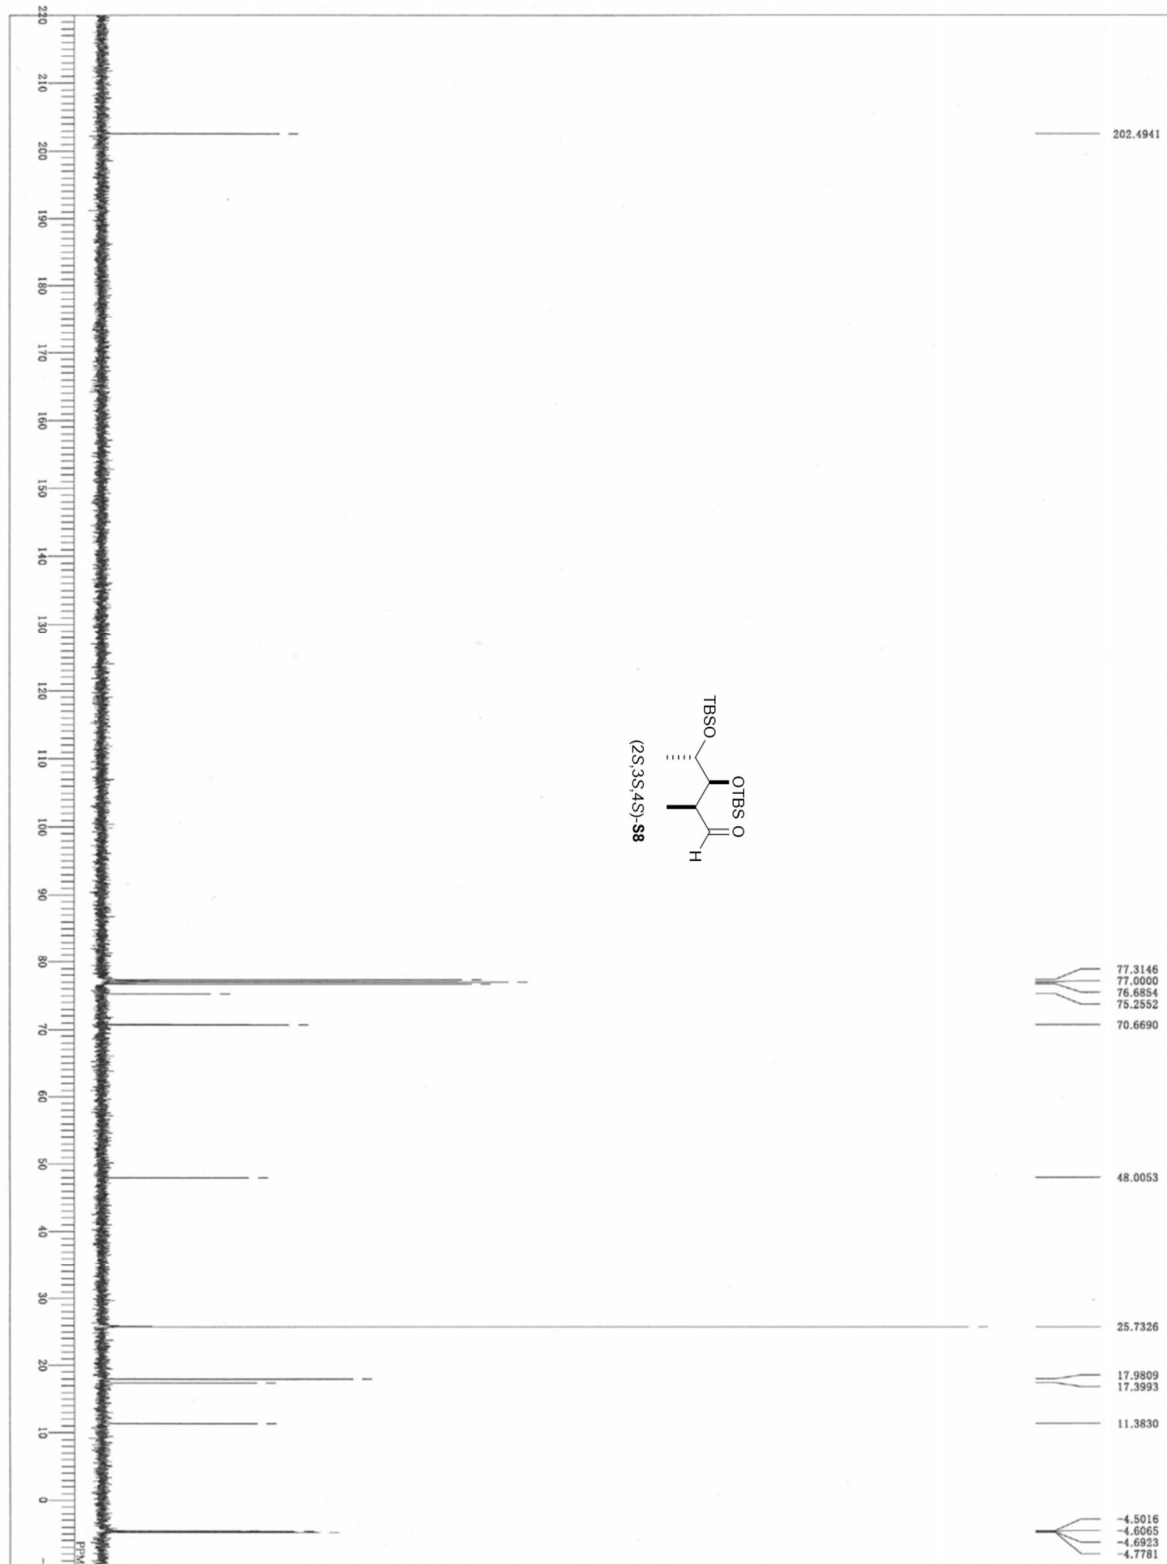



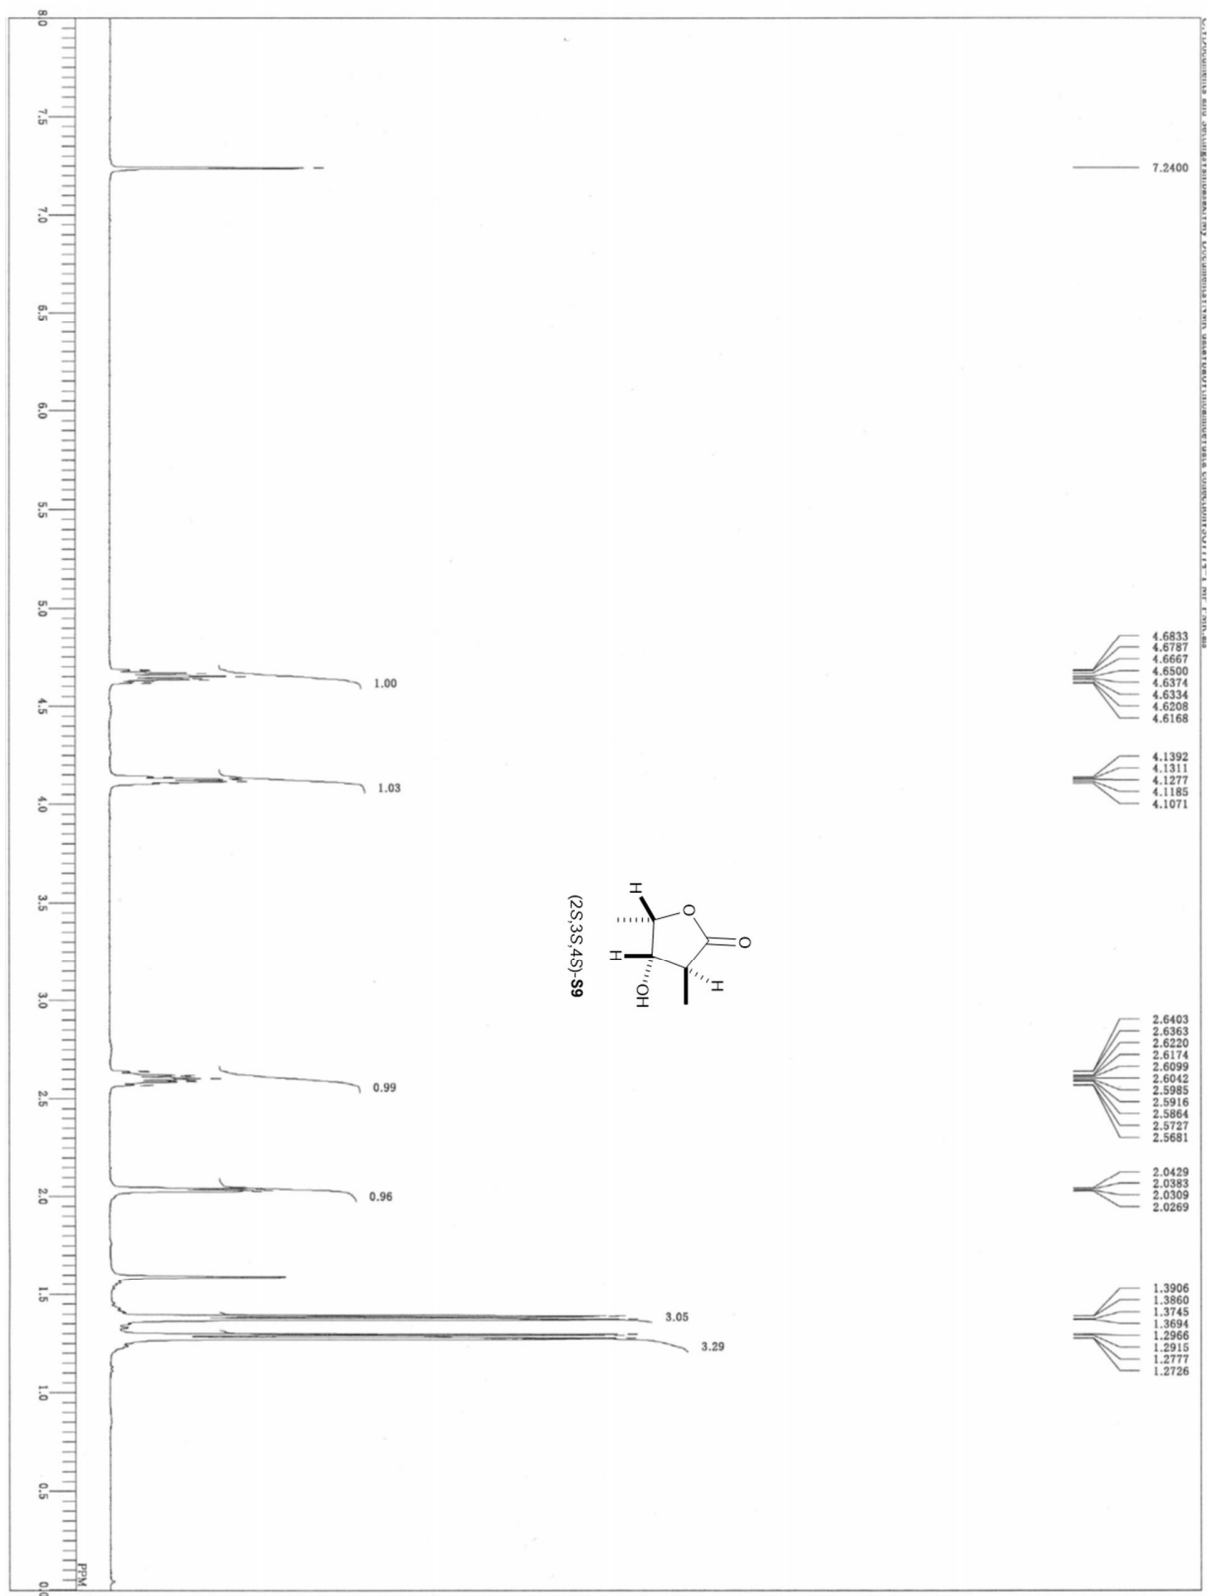

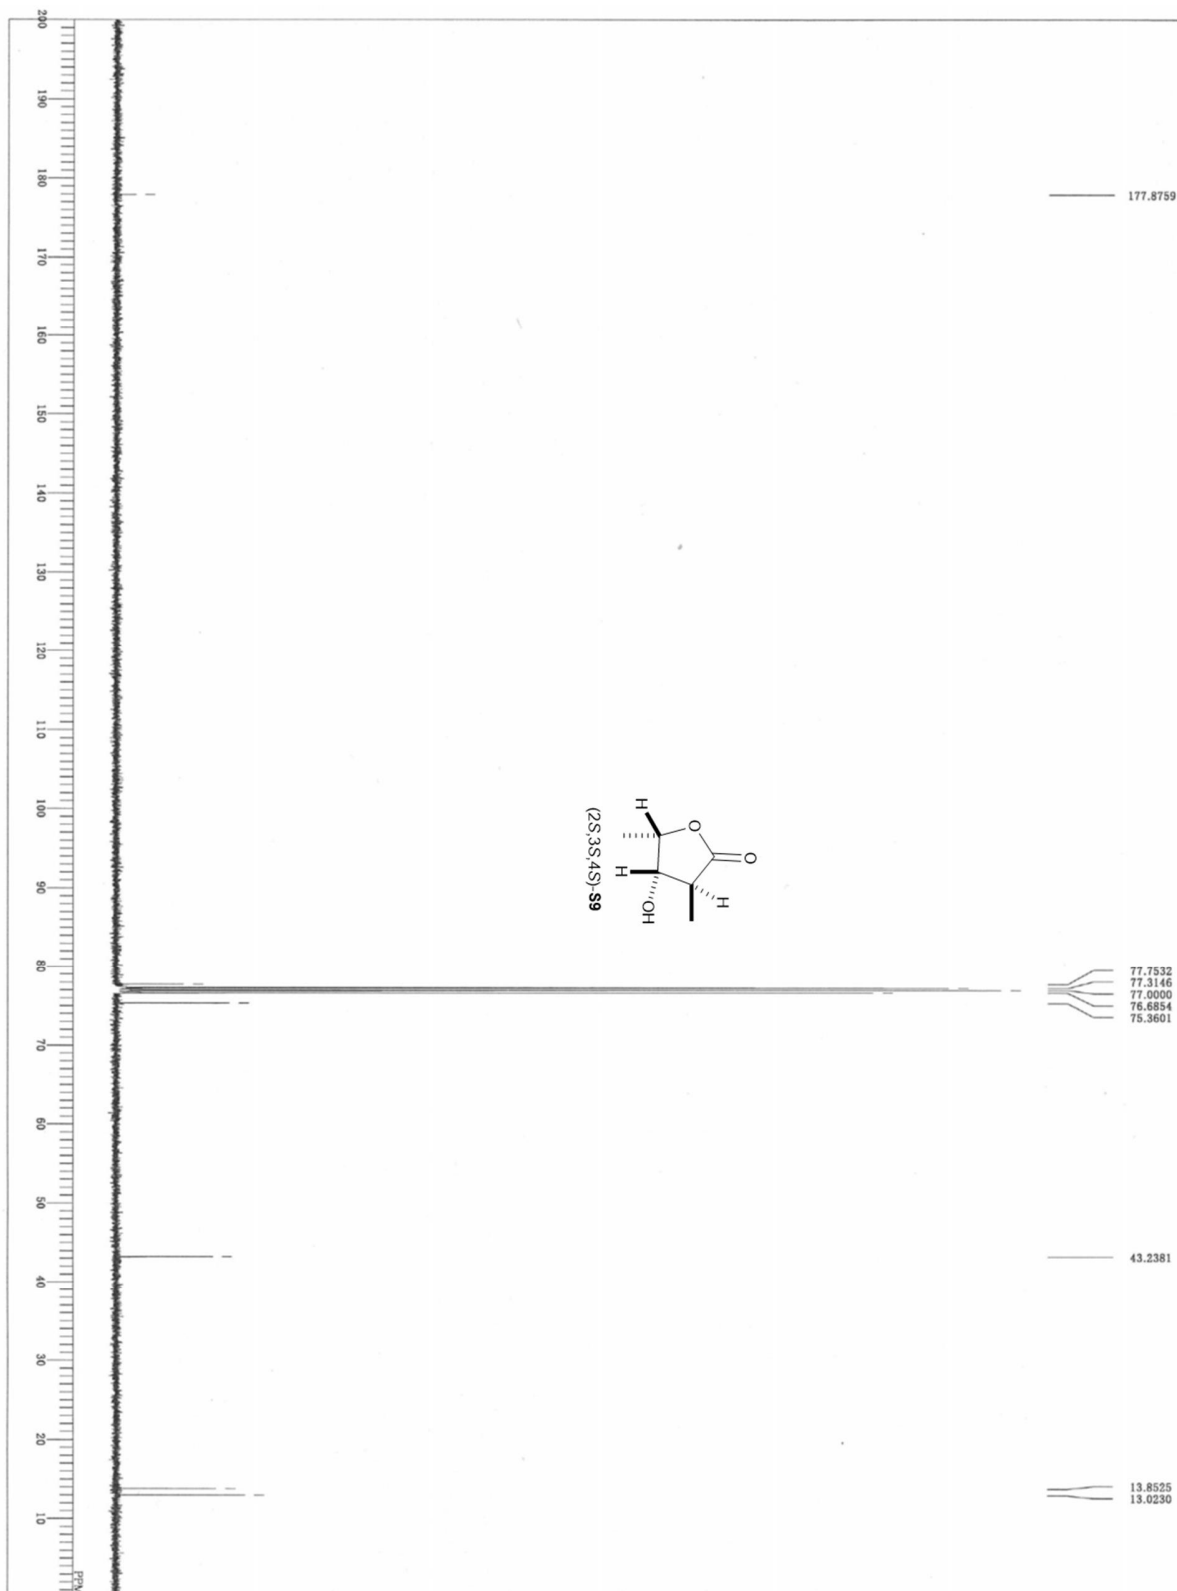

Supplement: c5sc02218e1.pdf [file c5sc02218e1.pdf]
